# Supplementary material
Source: PubMed Central journal article supplement (PMC4422401)
Supplement: NIHMS685564-supplement-01.pdf [file NIHMS685564-supplement-01.pdf]

**SIRPA Protects against Cardiac Hypertrophy via the Disruption of  
TLR4 Signaling**

Ding-Sheng Jiang<sup>1,2</sup>; Xiao-Fei Zhang<sup>3</sup>; Lu Gao<sup>4</sup>; Jing Zong<sup>1,2</sup>; Heng Zhou<sup>1,2</sup>; Yu Liu<sup>1,2</sup>; Yan Zhang<sup>1,2</sup>;  
Zhou-Yan Bian<sup>1,2</sup>; Li-Hua Zhu<sup>1,2</sup>; Guo-Chang Fan<sup>3,5</sup>; Xiao-Dong Zhang<sup>3\*</sup>; Hongliang Li<sup>1,2\*</sup>

<sup>1</sup>Department of Cardiology, Renmin Hospital of Wuhan University, Wuhan 430060, China; <sup>2</sup>Cardiovascular Research Institute of Wuhan University, Wuhan 430060, China; <sup>3</sup>College of Life Sciences, Wuhan University, Wuhan 430072, China; <sup>4</sup>Department of Cardiology, Institute of Cardiovascular Disease, Union Hospital, Tongji Medical College, Huazhong University of Science and Technology, Wuhan, PR China; <sup>5</sup>Department of Pharmacology and Cell Biophysics, University of Cincinnati, Cincinnati, OH 45267, USA

**Ding-Sheng Jiang, Xiao-Fei Zhang, and Lu Gao are co-first authors**

**\* Hongliang Li and Xiao-Dong Zhang contributed equally to this article**

**Running Title:** SIRPA negatively regulates cardiac hypertrophy

**\*Correspondence to**

Hongliang Li, MD, PhD

Department of Cardiology

Renmin Hospital of Wuhan University;

Cardiovascular Research Institute, Wuhan University,

Jiefang Road 238, Wuhan 430060, PR China

Tel/Fax: 86-27-88076990

E-mail: [lihl@whu.edu.cn](mailto:lihl@whu.edu.cn)

## Supplemental Material

### Materials and Methods

#### Reagents

Antibodies against MCP-1 (2029, 1:1000 dilution), TNF $\alpha$  (3707, 1:1000 dilution), p-I $\kappa$ Ba<sup>ser32/36</sup> (9246, 1:1000 dilution), I $\kappa$ Ba (4814, 1:1000 dilution), P65 (4764, 1:1000 dilution), and p-P65<sup>ser536</sup> (3033, 1:1000 dilution) were purchased from Cell Signaling Technology (Danvers, MA, USA). Antibodies against TLR4 (sc30002, 1:200 dilution),  $\beta$ -MHC (sc53090, 1:200 dilution), and ANP (sc20158, 1:200 dilution) were purchased from Santa Cruz (Dallas, TX, USA). The antibody against IL-1 $\beta$  (AF-401-NA) was provided by R&D Systems (Minneapolis, MN, USA). The antibodies against GAPDH (MB001) and SIRPA (BS1324) were ordered from Bioworld Technology (Harrogate, UK). The antibody against Flag (F3165, 1:1000 dilution) was purchased from Sigma (St. Louis, MO, USA). The antibody against Myc (11814150001, 1:1000 dilution) was ordered from Roche (Mannheim, Germany). The BCA protein assay kit was obtained from Pierce (Rockford, IL, USA). We used IRDye<sup>®</sup> 800CW-conjugated secondary antibodies (LI-COR Biosciences, Lincoln, NE, USA) for visualization. Fetal calf serum (FCS) was ordered from Hyclone (Waltham, MA, USA). Eritoran was supplied by Eisai, Inc. (Andover, MA, USA). Lipopolysaccharide (LPS, stock number L4391), cell culture reagents, and all other experimental reagents were purchased from Sigma.

#### Mouse Models

All of the experimental procedures involving animals were approved by the Animal Care and Use Committee of Renmin Hospital of Wuhan University. The experiments of this study were performed with male mice that were 8 to 10 weeks of age and exhibited body weights of 24-27 g. All mice were anesthetized using pentobarbital (50mg/kg, Sigma, delivered intraperitoneally) or 1.5-2% Isoflurane (inhaled). The following animals were utilized in this study.

#### ***SIRPA Knockout and Cardiac-Specific SIRPA Overexpressing Mice***

SIRPA knockout (SIRPA<sup>-/-</sup>) mice (B6.129P2-Sirpa<sup><tm1Nog></sup>, C57BL/6 background) were kindly provided by Takashi Matozaki (Gunma University) and shipped by RIKEN (RBRC01544)<sup>1</sup>. Exons 7 and 8 of SIRPA were replaced with a neomycin selection cassette to produce SIRPA<sup>-/-</sup> mice. The following PCR primers were used to identify SIRPA<sup>-/-</sup> mice: primer 1, 5'-TAGTACAGACCA CAGCCCCATTCACTTCCT-3'; primer 2, 5'-TCGTGCTTTACGGTATCGCCGCTCCCGAAT-3'; and primer 3, 5'-ATACCATTGGCTGAGCCCCACTGGGAAAGAA-3'. Primers 1 and 2 were used to identify SIRPA<sup>-/-</sup> mice, whereas primers 1 and 3 were utilized to detect wild-type mice. Cardiac-specific SIRPA transgenic mice were generated by cloning full-length mouse SIRPA cDNA (OriGene, MC218099) downstream of the alpha myosin heavy chain ( $\alpha$ -MHC) promoter. The SIRPA transgenic mice were identified by PCR analyses of tail genomic DNA, using the forward primer 5'-ATCTCCCCCATAAGAGTTTGAGTC-3' and the reverse primer 5'-GTGTCAGGCTCT GAT GATCCTTT-3'. Four independent lines were generated and studied.

#### ***TLR4 Knockout Mice and SIRPA/TLR4 Double Knockout Mice***

TLR4 knock-out (TLR4<sup>-/-</sup>) mice (B6.B10ScN-*Tlr4*<sup>lps-del</sup>/JthJ) were ordered from Jackson Laboratory (stock number 007227). The knock-out mice were identified through PCR analyses of tail genomic

DNA. The following primers were utilized for these analyses: knock-out forward, 5'-GCAAGTTTC TATATGCATTCTC-3', knock-out reverse, 5'-CCTCCATTTCCAATAGGTAG-3'; wild-type forward, 5'-ATATGCATGATCAACACCACAG-3'; and wild-type reverse, 5'-TTTCCATTGCTG CCCTATAG-3'. The SIRPA knockout mice were crossed with TLR4 knockout mice to generate SIRPA/TLR4 double knockout mice.

### **Aortic Banding and Human Heart Samples**

We established a model of pressure overload-induced cardiac hypertrophy via aortic banding (AB) as previously described<sup>2-4</sup>. Briefly, mice were anesthetized with pentobarbital sodium, and the left chest was opened to identify the thoracic aorta through blunt dissection in the second intercostal space after absence of reflexes was observed. A 7-0 silk suture was used to tie the thoracic aorta to a 27G (for body weights of 24-25 g) or 26G (for body weights of 26-27 g) needle, followed by needle removal and closing of the thoracic cavity. Finally, Doppler analysis was used to determine whether adequate constriction of the aorta had been produced. In particular, pressure gradients (mm Hg) were calculated from the peak blood velocity ( $V_{max}$ , measured in m/s;  $PG=4 \times V_{max}^2$ ) that had been determined by Doppler measurements across the AB region. And these pressure gradients were equivalent in all of the groups of AB-operated mice. The sham group underwent a similar procedure without aortic constriction.

Samples of failing human hearts were collected from the left ventricles of DCM patients who were undergoing heart transplants. Control samples were obtained from the left ventricles of normal heart donors who died of accidental causes, but their hearts were not suitable for transplantation (for non-cardiac reasons). Written informed consent was obtained from the families of prospective heart donors. All of the procedures involving human samples conformed to the principles outlined in the Declaration of Helsinki and were approved by the Renmin Hospital of Wuhan University Review Board, Wuhan, China.

### **Echocardiography and Hemodynamic Measurements**

Echocardiography was performed on mice in M-mode using a Mylab30CV (ESAOTE) machine with a 15-MHz probe as described previously<sup>2-6</sup>. First, all of the mice were anesthetized with 2% isoflurane by inhalation. M-mode tracings derived from the short axis of the left ventricle (LV) at the level of the papillary muscles were recorded for measurements of LV end-diastolic dimension (LVEDD), LV end-systolic dimension (LVESD) and LV fractional shortening [ $LVFS(\%)=(LVEDD-LVESD)/LVEDD \times 100\%$ ]. All of the parameters were obtained from at least three beats and then averaged. To obtain invasive hemodynamic measurements, a 1.4-French catheter-tip micromanometer catheter (SPR-839; Millar Instruments) was inserted into the left ventricle via the right carotid artery. Pressure and dp/dt values were recorded continuously with an Aria pressure-volume conductance system that was coupled to a Powerlab/4SP A/D converter; these values were then stored and displayed on a personal computer.

### **Histological Analysis**

Animal hearts were harvested and arrested with 1M KCl, fixed for > 24 hours in 10% formalin, and then embedded in paraffin. Subsequently, these hearts were transversely sectioned at 5 $\mu$ m. Using

standard staining procedures, heart sections were subjected to hematoxylin-eosin (HE) staining for histopathological analyses or picosirius red (PSR) staining for fibrosis assessments. Heart sections were also stained with FITC-conjugated wheat germ agglutinin (WGA, Invitrogen Corp.). Myocyte cross-sectional area was measured using a quantitative digital image analysis system (Image-Pro Plus 6.0); more than 100 myocytes in the examined sections were outlined for each group of mice.

### **Recombinant Adenoviral Vectors**

Replication-defective adenoviral vectors were used to overexpress rat SIRPA (AdSIRPA) under the control of the cytomegalovirus (CMV) promoter, and a similar adenoviral vector expressing GFP was used as a control. To knockdown SIRPA expression, three rat shSIRPA adenoviral constructs were purchased from SABiosciences (KR50731G), and the one that produced the most significant reduction in SIRPA levels was selected for our experiments (designated AdshSIRPA). AdshRNA was used as a non-targeting control. Cells were infected with the indicated adenoviruses diluted in media at a multiplicity of infection (MOI) of 10.

### **Cultured Neonatal Rat Cardiac Myocytes and Treatment**

Neonatal rat cardiomyocytes (NRCMs) were prepared as previously described<sup>3</sup>. Briefly, neonatal hearts were removed from the thoracic cavities of 1- to 2-day-old Sprague-Dawley rats after euthanization, and the heart tissue was finely minced and digested in PBS containing 0.03% trypsin and 0.04% collagenase type II. After removing fibroblasts using a differential attachment technique, NRCMs were seeded at a density of  $1 \times 10^6$  cells/well onto gelatin-coated six-well culture plates. Medium that consisted of DMEM/F12 medium supplemented with 20% FCS, BrdU (0.1 mM, to inhibit the proliferation of fibroblasts), and penicillin/streptomycin was then added to these six-well plates. After 48 hours, the culture medium was replaced with serum-free DMEM/F12 for 12 hours prior to stimulation with Ang II (1  $\mu$ M) or phenylephrine (PE, 100  $\mu$ M). To identify the role of TLR4 in SIRPA-regulated cardiac hypertrophy, we treated AdSIRPA-infected cardiomyocytes with Ang II (1  $\mu$ M) in the presence or absence of the TLR4 agonist lipopolysaccharide (LPS, 100 ng/mL) or TLR4 inhibitor eritoran (10 ng/mL) for 48 hours, respectively.

### **Measurement of the Protein/DNA Ratio**

Cultured NRCMs were washed twice with PBS for determining total cellular protein and DNA content after stimulated with Ang II or PBS for 48 hours. The samples were centrifuged for 10 min at 10,000 g at 4°C after adding 0.2N perchloric acid (1 ml) to each well. The precipitates were incubated for 20 min at 60 °C with 250  $\mu$ l of 0.3 N KOH. Protein content was assessed by using BCA Protein Assay Kit (Pierce, CAT: 23225), and DNA content was determined by Hoechst dye 33258 (Invitrogen, CAT: H3569) with salmon sperm DNA (Sigma, CAT: D1626) as a standard.

### **Immunofluorescence**

NRCMs, which were infected with AdSIRPA or AdshSIRPA were cultured on cover slips and treated with Ang II (1  $\mu$ M) for 48 hours. The cardiomyocytes were then fixed with 3.7% formaldehyde in PBS for 15 min at room temperature, washed three times, and then permeabilized

with 0.1% Triton X-100 in PBS for 40 min. Finally, NRCMs were stained with  $\alpha$ -actinin (1:100 dilution) using standard immunofluorescence staining techniques.

### **Quantitative Real-Time PCR and Western Blotting**

Total mRNA was extracted from primary cells and ventricles using TRIzol reagent (Invitrogen), and then cDNA was synthesized with oligo (dT) primers using the Transcriptor First Strand cDNA Synthesis Kit (Roche). Quantitative real-time PCR was performed using SYBR green (Roche) in order to determine the expression levels of our genes of interest, and the results were normalized against GAPDH expression. In addition, lysis buffer was used to extract the total protein from the ventricles and primary cells, and the concentration of protein was determined using the Pierce<sup>®</sup> BCA Protein Assay kit (Pierce). Protein (50  $\mu$ g) was loaded and separated through SDS-PAGE (Invitrogen) followed by transfer to PVDF membranes (Millipore), which were then blocked (5% BSA in TBS, 90 min at room temperature) and incubated with various primary antibodies (overnight at 4°C). Membranes were washed three times and then incubated with a secondary IRDye<sup>®</sup> 800CW-conjugated antibody (Li-Cor Biosciences, 1:10,000 dilution) for 60 min. Finally, signals were visualized using an Odyssey Imaging System (Li-Cor Biosciences), and the specific protein expression levels were normalized to GAPDH on the same PVDF membrane.

### **SIRPA-Luciferase Reporter Assays**

Nucleotides -1341 to +644 of the mouse SIRPA gene were amplified from the genome of mouse heart tissue by PCR with Platinum Taq DNA polymerase High Fidelity and inserted into the pGL3 basic vector. H9C2 cells ( $2 \times 10^5$  per well) were seeded on 24-well plates the day before transfection. Cells at 50-80% confluence were transfected with 1  $\mu$ g of pGL3-SIRPA using a FUGENE<sup>®</sup> HD Transfection reagent. After 24 hours, cells were harvested, washed three times with PBS and lysed in 100  $\mu$ l of the passive lysis buffer (PLB) according to the manufacturer's instructions (Promega). Luciferase activity was measured using a Dual-Luciferase<sup>®</sup> Reporter Assay System kit (Promega), and a Single-Mode SpectraMax Microplate Reader (Molecular Devices) after removing cell debris by centrifugation.

### **Microarray Data Acquisition**

Two weeks after AB surgery, TRIzol was used to isolate RNA from the ventricles of three SIRPA knockout and three wildtype hearts, and the total RNA from these heart samples was used for 12 hybridizations on the mouse 430GeneChip Set (Affymetrix, Santa Clara, CA). The samples were prepared for hybridization in accordance with the manufacturer's instructions. The chips were scanned using the GeneArray scanner (Affymetrix), and output files were visually inspected for hybridization artifacts. Arrays lacking artifacts were then analyzed using GeneChip Operating System (GCOS; Affymetrix), and the expression analysis files created by GCOS were then transferred to GeneSpring 7.0 (Agilent) for further analysis. In particular, statistically significant changes in mean expression values were determined by importing the data from GCOS into GeneSpring 7.0. The data were normalized using a robust multichip analysis (RMA) followed by an ANOVA, and genes with statistically significant changes in expression between groups ( $P < 0.05$ ) were selected for further analysis.

### **Immunoprecipitation**

Mammalian expression plasmids for SIRPA and TLR4 were ordered from Addgene. A Flag-cherry-TLR4 recombinant was constructed by subcloning the encoding region of mouse TLR4 into the *Bam*HI and *Xho*I sites of the pSicoR-Flag-cherry-C1 vector. Mouse TLR4 cDNA was amplified by PCR using the TLR4-Forward (5'-CGCGGATCCATGATGCCTCCCTGGCTCCT-3') and TLR4-Reverse (5'-ACGCGTCTGACTCAGGTCCAAGTTGCCGTTT-3') primers; digested by *Bam*HI and *Sall*I; and ligated into a pSicoR-Flag-cherry-C1 vector. The EGFP-myc-SIRPA recombinant was constructed by subcloning the encoding region of mouse SIRPA into the *Bam*HI and *Xho*I sites of this pSicoR-Flag-cherry-C1 vector. Mouse SIRPA cDNA was amplified by PCR using the SIRPA-Forward (5'-CGCGGATCCATGGAGCCCGCCGGCCCGG-3') and SIRPA-Reverse (5'-ACGCGTCTGACTCACTTCTCTGGACCTGGAC-3') primers; digested by *Bam*HI and *Sall*I; and ligated into the pSicoR-EGFP-myc-C1 vector.

To perform the transient transfection and coimmunoprecipitation experiments, cultured HEK293T cells were cotransfected with pSicoR-Flag-cherry-TLR4 and pSicoR-EGFP-myc-SIRPA for 48 h, lysed in immunoprecipitation buffer (20 mM Tris-HCl (pH 8.0), 100 mM NaCl, 1 mM EDTA, and 0.5% NP-40, supplemented with protease inhibitor cocktail) for 20 min and then centrifuged to remove cell debris. In accordance with manufacturer recommendations, for each immunoprecipitation, 500  $\mu$ l of the sample was incubated with 10  $\mu$ l of protein A/G-agarose beads (Roche) and 1  $\mu$ g of antibody on a rocking platform overnight at 4°C. Finally, the immunoprecipitates were washed 5 to 6 times with cold immunoprecipitation buffer and dissolved in 1x loading buffer. The cell lysates and immunoprecipitates were immunoblotted using the indicated primary antibodies, corresponding secondary antibodies, and the SuperSignal chemiluminescence kit (Millipore).

### **Confocal Microscopy**

HEK293T cells were seeded in a 24-well plate containing cover slips. At 48 h after pSicoR-EGFP-myc-SIRPA and pCherry-TLR4 cotransfection, these cells were fixed in 200  $\mu$ l of 4% fresh paraformaldehyde for 15 min, permeabilized with 0.2% Triton X-100 in PBS for 5 min, and then incubated in Image-IT™ FX signal enhancer (I36933, Invitrogen) for 30 min. The cells were washed with TBS-T three times, stained with DAPI (1 g/ml, 15 min), and mounted onto slides with mounting solution (D2522, Sigma). Images were obtained with a confocal laser scanning microscope (Fluo view 1000, Olympus).

### **Statistical Analysis**

Data are represented as means $\pm$ SD. Two-tailed Student t-tests were used to compare the means of two sample groups, and one-way ANOVA tests with LSD (equal variances assumed) or Tamhane's T2 (equal variances not assumed) were applied to multiple groups. Statistical significance was set at  $P < 0.05$ .

## References

1. Inagaki K, Yamao T, Noguchi T, Matozaki T, Fukunaga K, Takada T, Hosooka T, Akira S, Kasuga M. Shps-1 regulates integrin-mediated cytoskeletal reorganization and cell motility. *EMBO J.* 2000;19:6721-6731.
2. Lu J, Bian ZY, Zhang R, et al. Interferon regulatory factor 3 is a negative regulator of pathological cardiac hypertrophy. *Basic Res Cardiol.* 2013;108:326.
3. Li H, He C, Feng J, Zhang Y, Tang Q, Bian Z, Bai X, Zhou H, Jiang H, Heximer SP, Qin M, Huang H, Liu PP, Huang C. Regulator of G protein signaling 5 protects against cardiac hypertrophy and fibrosis during biomechanical stress of pressure overload. *Proc Natl Acad Sci U S A.* 2010;107:13818-13823.
4. Huang H, Tang QZ, Wang AB, Chen M, Yan L, Liu C, Jiang H, Yang Q, Bian ZY, Bai X, Zhu LH, Wang L, Li H. Tumor suppressor a20 protects against cardiac hypertrophy and fibrosis by blocking transforming growth factor-beta-activated kinase 1-dependent signaling. *Hypertension.* 2010;56:232-239.
5. Li HL, Zhuo ML, Wang D, Wang AB, Cai H, Sun LH, Yang Q, Huang Y, Wei YS, Liu PP, Liu DP, Liang CC. Targeted cardiac overexpression of a20 improves left ventricular performance and reduces compensatory hypertrophy after myocardial infarction. *Circulation.* 2007;115:1885-1894.
6. Xiao J, Moon M, Yan L, Nian M, Zhang Y, Liu C, Lu J, Guan H, Chen M, Jiang D, Jiang H, Liu PP, Li H. Cellular flice-inhibitory protein protects against cardiac remodeling after myocardial infarction. *Basic Res Cardiol.* 2012;107:239.

## Supplemental Tables

**Table S1:** Information of human DCM hearts and donor hearts

| n  | Type  | Age | Sex | Cardiac Function |           | Therapy before transplatation |              |           |         |
|----|-------|-----|-----|------------------|-----------|-------------------------------|--------------|-----------|---------|
|    |       |     |     | LVEF(%)          | LVEDD(mm) | ACEI                          | Beta-Blocker | Diuretics | Digoxin |
| 1  | Donor | 37  | F   | N/A              | N/A       | N/A                           | N/A          | N/A       | N/A     |
| 2  | Donor | 30  | F   | N/A              | N/A       | N/A                           | N/A          | N/A       | N/A     |
| 3  | Donor | 28  | M   | N/A              | N/A       | N/A                           | N/A          | N/A       | N/A     |
| 4  | Donor | 43  | M   | N/A              | N/A       | N/A                           | N/A          | N/A       | N/A     |
| 5  | Donor | 25  | M   | N/A              | N/A       | N/A                           | N/A          | N/A       | N/A     |
| 6  | Donor | 53  | M   | N/A              | N/A       | N/A                           | N/A          | N/A       | N/A     |
| 7  | DCM   | 65  | M   | 23               | 74        | Y                             | N            | Y         | Y       |
| 8  | DCM   | 39  | F   | 17               | 80        | Y                             | Y            | Y         | Y       |
| 9  | DCM   | 41  | M   | 9                | 84        | Y                             | N            | Y         | Y       |
| 10 | DCM   | 44  | F   | 22               | 76        | Y                             | Y            | Y         | Y       |
| 11 | DCM   | 56  | M   | 23               | 90        | Y                             | Y            | Y         | Y       |
| 12 | DCM   | 64  | M   | 11               | 104       | N                             | N            | Y         | Y       |
| 13 | DCM   | 74  | M   | 36               | 88        | Y                             | N            | Y         | Y       |

DCM: Dilated cardiomyopathy; LVEF: Left ventricular ejection fraction; LVEDD: Left ventricular end-diastolic diameter. F: Female; M: Male. N/A: not available. Y: YES; N: NO



**Table S2** Anatomic and Echocardiographic Analysis in 16 Weeks Old Mice.

| <b>Parameters</b> | <b>SIRPA<sup>+/+</sup> mice<br/>( n=13 )</b> | <b>SIRPA<sup>-/-</sup> mice<br/>( n=15 )</b> | <b>NTG mice<br/>( n=13 )</b> | <b>TG mice<br/>( n=14 )</b> |
|-------------------|----------------------------------------------|----------------------------------------------|------------------------------|-----------------------------|
| BW(g)             | 30.45±1.45                                   | 31.03±1.53                                   | 30.02±1.18                   | 30.78±1.45                  |
| HW/BW(mg/g)       | 4.36±0.24                                    | 4.31±0.34                                    | 4.42±0.24                    | 4.34±0.22                   |
| LW/BW(mg/mg)      | 5.10±1.20                                    | 5.06±1.10                                    | 4.95±0.25                    | 4.97±0.39                   |
| HW/TL(mg/mm)      | 7.26±0.34                                    | 7.22±0.40                                    | 7.20±0.43                    | 7.24±0.51                   |
| HR (beats/min)    | 546.71±35.28                                 | 541.88±39.66                                 | 583.00±40.28                 | 528.00±31.39                |
| LVEDD(mm)         | 3.61±0.09                                    | 3.73±0.18                                    | 3.72±0.21                    | 3.70±0.11                   |
| LVESD(mm)         | 2.07±0.05                                    | 2.16±0.23                                    | 2.12±0.25                    | 2.00±0.13                   |
| FS (%)            | 43.43±1.27                                   | 42.25±5.42                                   | 43.17±3.31                   | 46.00±2.28                  |

BW=body weight; HW=heart weight; LW=lung weight; TL=tibiae length; HR=heart rate; LVEDD=left ventricular end-diastolic diameter; LVESD=left ventricular end-systolic diameter; FS=fractional shortening, LVESP=Left ventricular End-systolic Pressure. LVEF=Left ventricular ejection fraction. All values are presented as means ± SD.

**Table S3** Parameters in SIRPA<sup>-/-</sup> and SIRPA<sup>+/+</sup> mice at 4 weeks after sham operation or AB

| Parameters              | Sham                      |                           | AB                        |                           |
|-------------------------|---------------------------|---------------------------|---------------------------|---------------------------|
|                         | SIRPA <sup>+/+</sup> mice | SIRPA <sup>-/-</sup> mice | SIRPA <sup>+/+</sup> mice | SIRPA <sup>-/-</sup> mice |
|                         | ( n=15 )                  | ( n=16 )                  | ( n=13 )                  | ( n=15 )                  |
| BW (g)                  | 28.68±2.06                | 28.03±1.90                | 28.12±1.48                | 26.50±2.77                |
| HR (beats/min)          | 554.75±21.74              | 491.64±39.32              | 518.29±31.16              | 492.36±32.41              |
| LVEDD(mm)               | 3.60±0.12                 | 3.62±0.09                 | 4.53±0.13*                | 5.06±0.25*†               |
| LVESD(mm)               | 1.99±0.06                 | 2.05±0.09                 | 3.13±0.13*                | 3.92±0.25*†               |
| FS (%)                  | 44.75±1.39                | 43.55±2.58                | 31.00±1.53*               | 22.82±2.23*†              |
| LVESP(mmHg)             | 112.00±8.26               | 113.69±13.41              | 156.87±5.99*              | 125.68±14.24*†            |
| LVEF (%)                | 52.91±3.22                | 54.82±3.83                | 37.58±4.90*               | 25.02±4.35*†              |
| dp/dt max<br>(mmHg/sec) | 10160.29±966.34           | 9931.33±1248.38           | 7871.00±848.54*           | 6095.63±1017.39*†         |
| dp/dt min<br>(mmHg/sec) | -8514.86±948.64           | -8410.50±874.56           | -6782.67±1650.98*         | -4738.50±831.57*†         |

\**P*<0.05 vs. SIRPA<sup>+/+</sup> sham operation. †*P*<0.05 vs. SIRPA<sup>+/+</sup> AB after 4 weeks AB.

All values are presented as means ± SD.

**Table S4** Parameters in SIRPA transgenic mice (TG) and non-transgenic littermates (NTG) at 8 weeks after sham operation or AB

| <b>Parameters</b>       | <b>NTG- Sham mice<br/>( n=14 )</b> | <b>TG -Sham mice<br/>( n=17 )</b> | <b>NTG-AB mice<br/>( n=14 )</b> | <b>TG -AB mice<br/>( n=15 )</b> |
|-------------------------|------------------------------------|-----------------------------------|---------------------------------|---------------------------------|
| BW (g)                  | 29.03±2.24                         | 28.76±1.78                        | 28.18±1.58                      | 28.12±1.12                      |
| HR (beats/min)          | 539.86±22.56                       | 475.90±37.41                      | 444.86±27.93                    | 483.27±23.82                    |
| LVEDD(mm)               | 3.61±0.11                          | 3.59±0.07                         | 4.96±0.22*                      | 4.18±0.17*†                     |
| LVESD(mm)               | 2.04±0.05                          | 2.04±0.07                         | 3.83±0.25*                      | 2.64±0.13*†                     |
| FS (%)                  | 43.29±1.60                         | 43.20±1.23                        | 22.71±1.80*                     | 37.18±1.17*†                    |
| ESP(mmHg)               | 115.11±5.34                        | 109.65±6.52                       | 124.54±8.77                     | 171.77±17.15*†                  |
| LVEF (%)                | 53.51±5.16                         | 58.18±7.63                        | 28.65±6.28*                     | 37.46±5.60*†                    |
| dp/dt max<br>(mmHg/sec) | 10041.00±863.01                    | 9639.14±376.82                    | 6455.38±1471.87*                | 8150.43±798.91*†                |
| dp/dt min<br>(mmHg/sec) | -8489.29±1068.27                   | -8091.71±469.52                   | -5075.38±1473.85*               | -7239.86±1100.98*†              |

\* $P < 0.05$  vs. NTG sham operation. † $P < 0.05$  vs. NTG AB after 8 weeks AB.

All values are presented as means ± SD.

**Table S5** Parameters in SIRPA<sup>+/+</sup>, TLR4<sup>-/-</sup>, SIRPA<sup>-/-</sup>, TLR4<sup>-/-</sup>/SIRPA<sup>-/-</sup> (DKO) mice at 4 weeks after AB operation.

|                   | <b>SIRPA<sup>+/+</sup> mice</b> | <b>TLR4<sup>-/-</sup> mice</b> | <b>SIRPA<sup>-/-</sup> mice</b> | <b>DKO mice</b> |
|-------------------|---------------------------------|--------------------------------|---------------------------------|-----------------|
| <b>Parameters</b> | <b>( n=13 )</b>                 | <b>( n=9 )</b>                 | <b>( n=15 )</b>                 | <b>( n=11 )</b> |
| BW (g)            | 28.12±1.48                      | 27.28±1.39                     | 26.50±2.77                      | 28.24±2.78      |
| HR (beats/min)    | 518.29±31.16                    | 496.83±30.99                   | 492.36±32.41                    | 487.60±36.43    |
| LVEDD(mm)         | 4.53±0.13                       | 4.05±0.19*                     | 5.06±0.25*                      | 4.76±0.21†      |
| LVESD(mm)         | 3.13±0.13                       | 2.60±0.13*                     | 3.92±0.25*                      | 3.34±0.11†      |
| FS (%)            | 31.00±1.53                      | 35.83±1.72*                    | 22.82±2.23*                     | 29.80±2.17†     |

\* $P < 0.05$  versus SIRPA<sup>+/+</sup> mice after 4 weeks AB. † $P < 0.05$  versus SIRPA<sup>-/-</sup> mice after 4 weeks AB. All values are means ± SD.

## Supplemental Figures

**Figure S1**

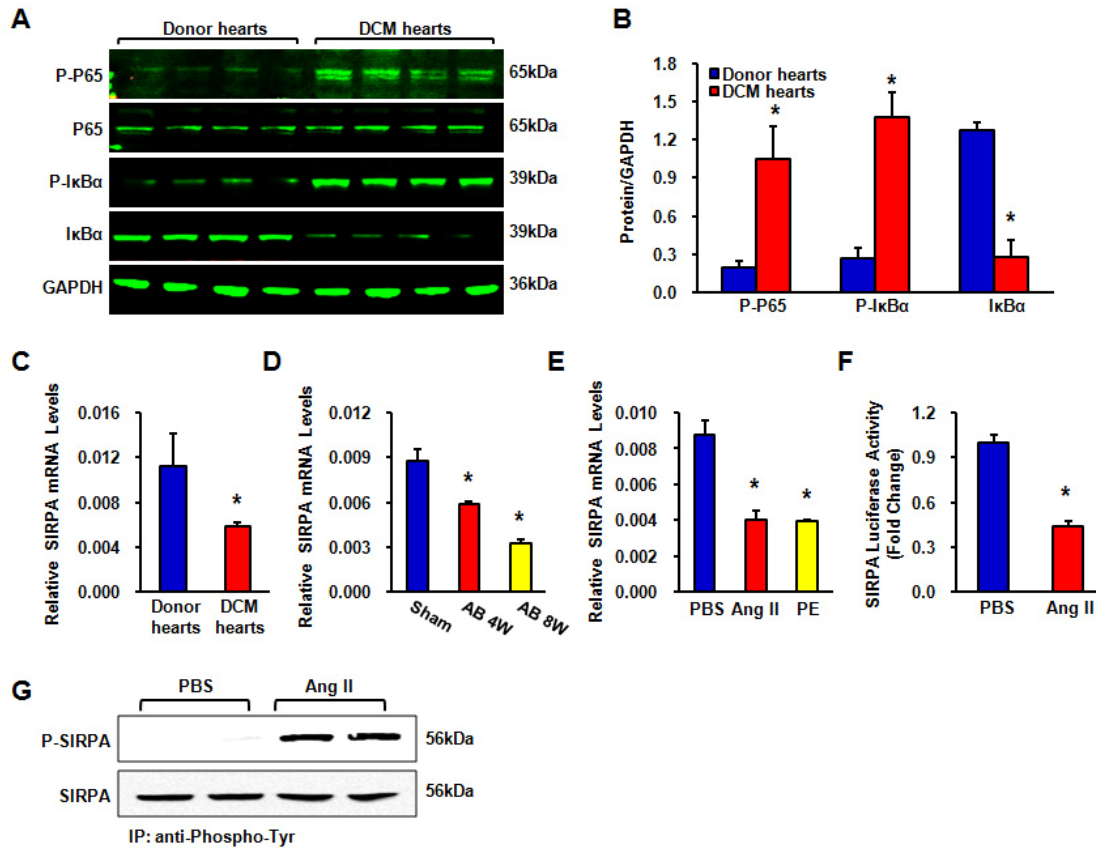

**Figure S1 (A/B)** Phosphorylation and total protein levels of IκBα and P65 expressed in human DCM and Donor Hearts. (A) Representative blots; (B) Quantitative results. (n=3, \* $P < 0.05$  vs. donor hearts). (C) The relative mRNA levels of SIRPA in DCM hearts (n=3, \* $P < 0.05$  vs. donor hearts). (D) The relative mRNA levels of SIRPA in samples from wild-type mice at the indicated times after Sham or AB surgery (n=3, \* $P < 0.05$  vs. Sham). (E) The relative mRNA levels of SIRPA in samples from NRCMs treated with Ang II (1μM) or PE (100μM) for 48 hours (n=3, \* $P < 0.05$  vs. PBS). (F) The luciferase activity of SIRPA in H9C2 cells treated with Ang II (1μM) (n=3, \* $P < 0.05$  vs. PBS). (G) The phosphorylation level of SIRPA was increased in response to Ang II stimulation in NRCMs. (n=3). n indicates number of independent experiments.

**Figure S2**

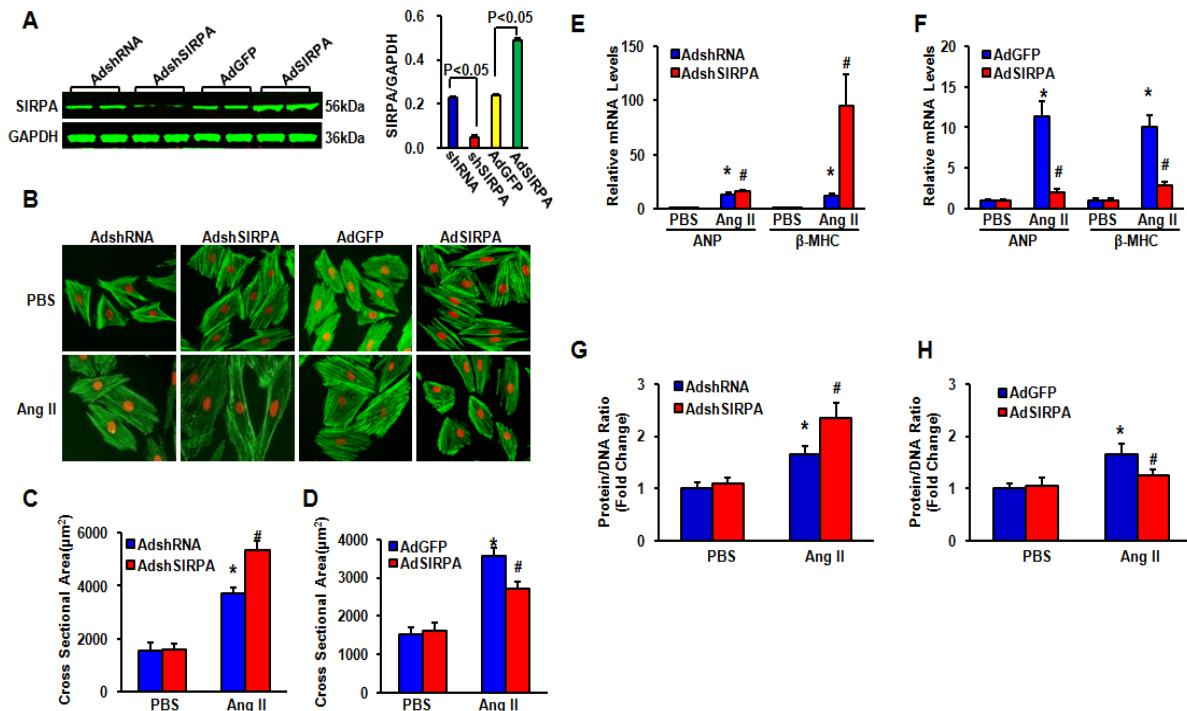

**Figure 2 SIRPA Prevents Cardiomyocyte Hypertrophy *in vitro*.** (A) SIRPA protein levels in NRCMs infected with AdshSIRPA or AdSIRPA (n=3 independent experiments); **Left:** Representative blots; **Right:** Quantitative results. (B) Representative images of NRCMs infected with AdshSIRPA or AdSIRPA and treated with Ang II (1 µM) for 48 hours. (C-D) Cell surface area of NRCMs infected with (C) AdshSIRPA or (D) AdSIRPA and treated with Ang II (1 µM) for 48 hours (n=100+ cells). (E-F) Relative mRNA levels of ANP and β-MHC in NRCMs infected with (E) AdshSIRPA or (F) AdSIRPA and treated with Ang II (1 µM) for 48 hours (n=3 independent experiments). (G-H) The ratio of protein/DNA was determined in AdshRNA- and AdshSIRPA-infected neonatal rat cardiomyocytes, as well as in AdGFP- and AdSIRPA-myocytes upon the treatment with either PBS or Ang II (1 µM) for 48 h (n=6). \*P<0.05 vs. AdshRNA or AdGFP/PBS; #P<0.05 vs. AdshRNA or AdGFP/Ang II.

**Figure S3**

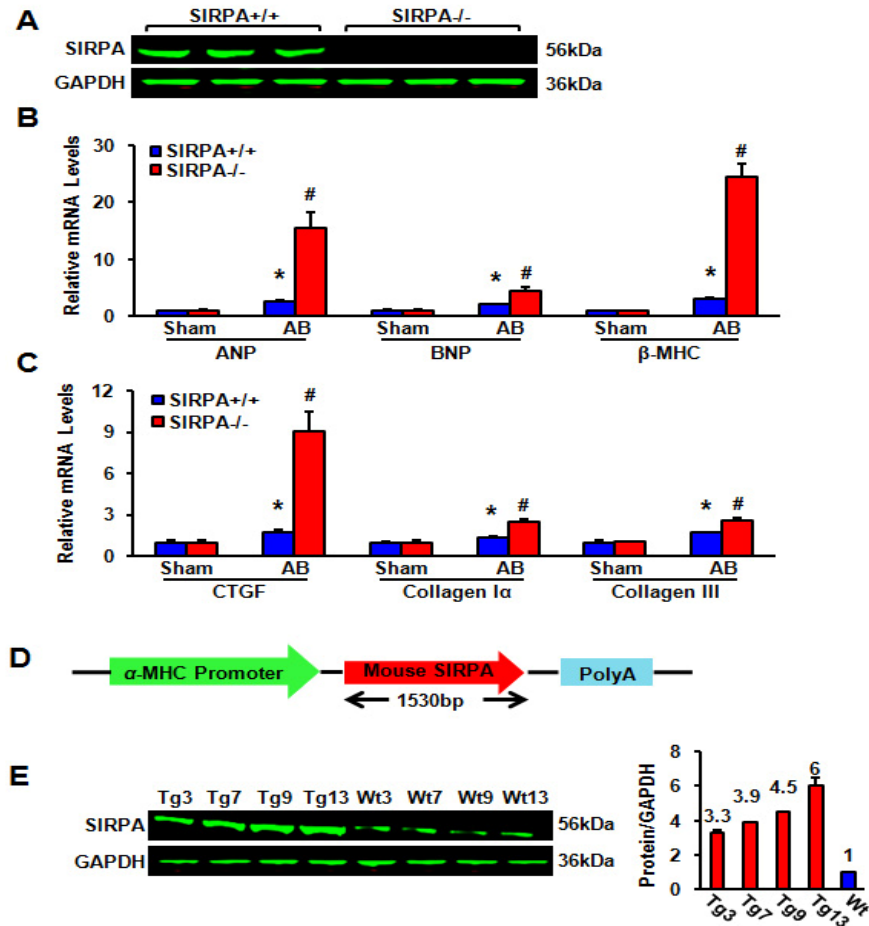

**Figure S3 SIRPA Inhibits Pressure Overload-induced Cardiac Hypertrophy and Fibrosis.** (A) Protein levels of SIRPA in samples from the ventricles of SIRPA<sup>+/+</sup> (WT) and SIRPA<sup>-/-</sup> (KO) mice. (B) Relative mRNA levels of ANP, BNP and β-MHC in samples from WT and KO mice (n=4 mice per experimental group). (C) Relative mRNA levels of CTGF, Collagen Iα and Collagen III in samples from WT and KO mice (n=4 mice per experimental group). \**P*<0.05 vs. WT/Sham; #*P*<0.05 vs. WT/AB. (D) A schematic diagram illustrating the construction of transgenic mice with full-length mouse SIRPA cDNA under the control of the α-myosin heavy chain promoter. (E) Protein levels of SIRPA in samples from four independent transgenic lines and their wild-type littermates. Left: Representative blots; Right: Quantitative results.

Figure S4

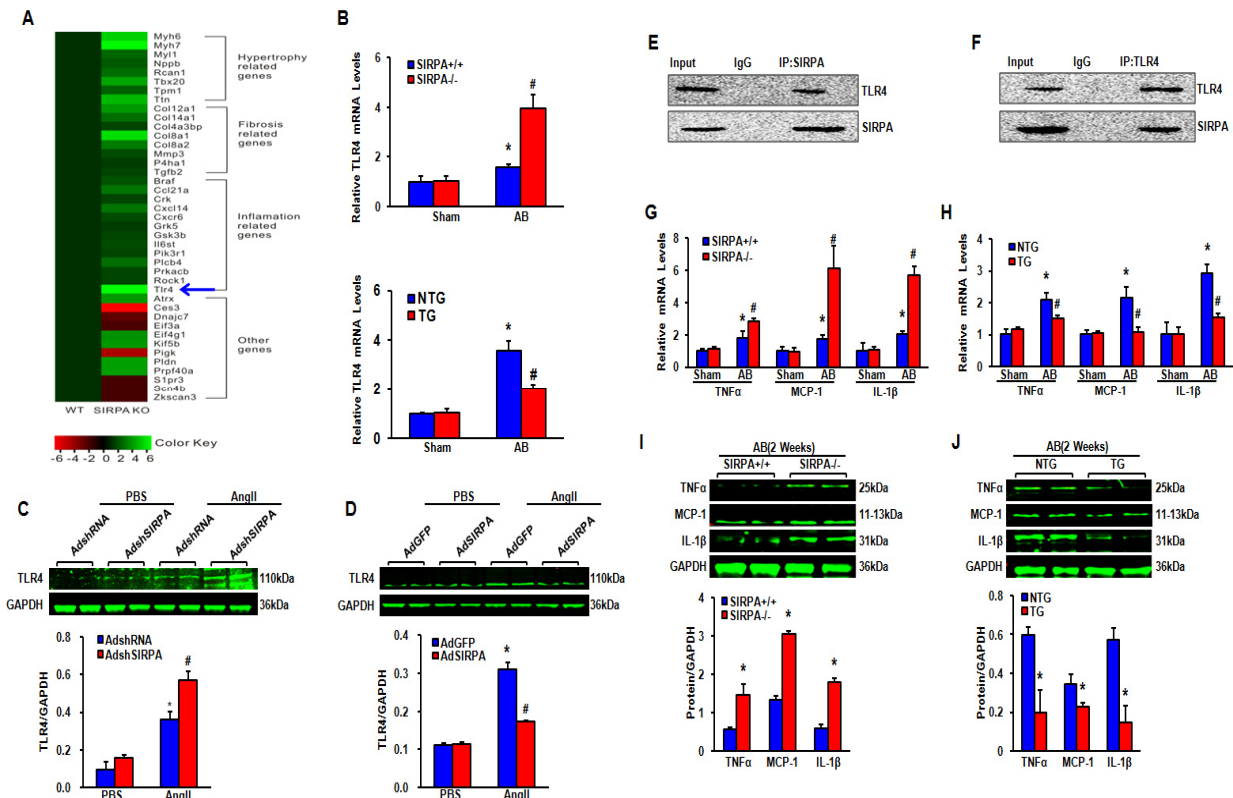

**Figure S4 SIRPA Inhibits the TLR4 Signaling Pathway.** (A) Heat map of the differentially expressed genes in the hearts of WT and SIRPA KO mice at 2 weeks after AB surgery. Red indicates low expression, and green indicates high expression. (B) TLR4 mRNA levels in (top bar graph) WT and SIRPA KO mice and (bottom bar graph) NTG and SIRPA TG mice 2 weeks after Sham or AB surgery (n=3). (C-D) Confirmation of the *in vivo* results using NRCMs infected with AdshSIRPA or AdSIRPA and treated with Ang II for 48 hours (n=3, \* $P < 0.05$  vs. AdshRNA or AdGFP/PBS; # $P < 0.05$  vs. AdshRNA or AdGFP/Ang II). Top: Representative blots; Bottom: Quantitative results. (E-F) Co-IP was performed for endogenous interaction between SIRPA and TLR4 using the total protein of neonatal rat cardiomyocytes (NRCMs). Our results demonstrated that SIRPA interacted with TLR4. (E) Western blotting performed with SIRPA or TLR4 antibody after co-immunoprecipitation of SIRPA from NRCM lysates using a SIRPA antibody. (F) Western blot performed with SIRPA or TLR4 antibody after co-immunoprecipitation of TLR4 from NRCM lysates using a TLR4 antibody. (G) The levels of TNF $\alpha$ , MCP-1 and IL-1 $\beta$  mRNA in samples from WT and SIRPA KO mice 2 weeks after Sham or AB surgery. (H) The levels of TNF $\alpha$ , MCP-1 and IL-1 $\beta$  mRNA in samples from NTG and SIRPA TG mice 2 weeks after Sham or AB surgery. n=4 mice per experimental group, \* $P < 0.05$  vs. WT or NTG/Sham; #  $P < 0.05$  vs. WT or NTG/AB. (I-J) Protein levels of TNF $\alpha$ , MCP-1 and IL-1 $\beta$  in samples from (I) WT and SIRPA KO mice and (J) NTG and SIRPA TG mice 2 weeks after AB surgery (n=3, \* $P < 0.05$  vs. WT or NTG/AB). Top: Representative blots; Bottom: Quantitative results. n indicates number of independent experiments.



**Figure S5**

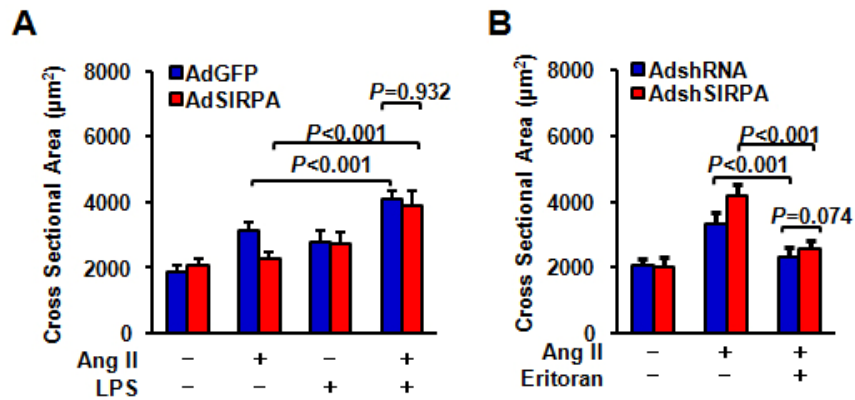

**Figure S5 SIRPA-mediated Anti-hypertrophic Effects are largely Dependent on the Inactivation of TLR4.** (A) NRCMs infected with AdSIRPA were treated with Ang II (1µM) and stimulation with or without the TLR4 activator LPS for 48 hours. The results of the cell size analysis revealed that the inhibition of myocyte hypertrophy by the overexpression of SIRPA was released by treatment with LPS. (B) Knockdown of the SIRPA-mediated promotion of myocyte hypertrophy was attenuated by the TLR4 inhibitor eritoran. n=100+ cells.

**Figure S6**

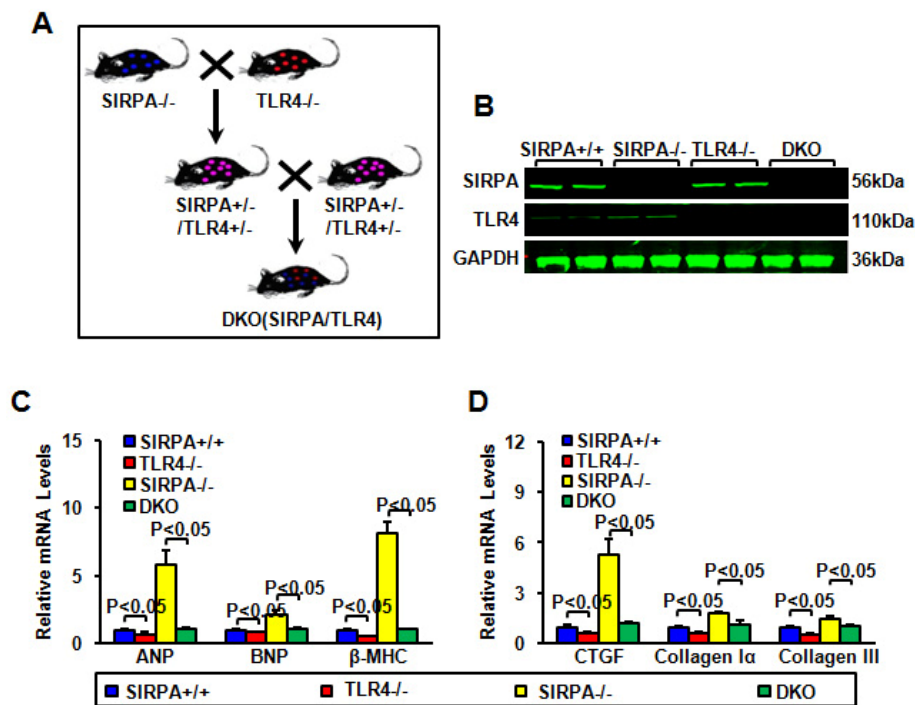

**Figure S6 The Disruption of TLR4 Rescued the Adverse Effect of SIRPA Deficiency on Cardiac Hypertrophy.** (A) Breeding strategy for the production of the SIRPA/TLR4 double-knockout (DKO) mice. (B) Protein levels of SIRPA and TLR4 in samples from the indicated groups 4 weeks after AB surgery. (C) The mRNA levels of the hypertrophic markers ANP, BNP and  $\beta$ -MHC in samples from the indicated groups (n=4). (D) The mRNA levels of the fibrotic markers CTGF, collagen I $\alpha$  and collagen III in samples from the indicated groups (n=4). n indicates number of mice per experimental group.

| <b>Gene Symbol</b> | <b>RefSeq Transcript ID</b> | <b>p-value(KO-AB vs. WT-AB)</b> | <b>Fold-Change(KO-AB vs. WT-AB)</b> |
|--------------------|-----------------------------|---------------------------------|-------------------------------------|
| Malat1             | NR_002847                   | 2.48E-07                        | 23.8089                             |
| Malat1             | NR_002847                   | 9.00E-07                        | 19.659                              |
| Malat1             | NR_002847                   | 2.33E-07                        | 16.2883                             |
| Dbp                | NM_016974                   | 4.35E-06                        | 8.20226                             |
| Itsn2              | NM_011365                   | 2.74E-07                        | 7.64874                             |
| Tlr4               | NM_021297                   | 7.50E-05                        | 6.48605                             |
| Ddx6               | NM_001110826                | 0.00105832                      | 6.30305                             |
| Myh7               | NM_001085378                | 0.00965294                      | 6.25891                             |
| Akap13             | NM_029332                   | 5.77E-06                        | 6.20819                             |
| Malat1             | NR_002847                   | 0.000139442                     | 6.1829                              |
| Col8a1             | NM_007739                   | 1.08E-05                        | 5.51025                             |
| 2810474O19Rik      | NM_026054                   | 0.000141888                     | 5.26131                             |
| Myh6               | NM_001164171                | 4.63E-05                        | 5.24986                             |
| Gpbp1              | NM_001122963                | 0.00031659                      | 5.23994                             |
| Dbp                | NM_016974                   | 2.10E-05                        | 4.86273                             |
| Jak1               | NM_146145                   | 0.000184095                     | 4.73753                             |
| Wdfy1              | NM_001111279                | 1.09E-05                        | 4.71329                             |
| Nedd4              | NM_010890                   | 2.01E-07                        | 4.67178                             |
| Ttn                | NM_011652                   | 1.30E-06                        | 4.58442                             |
| Hdlbp              | NM_133808                   | 2.58E-06                        | 4.45115                             |
| Itgb1bp3           | NM_027120                   | 0.000533128                     | 4.35086                             |
| Akap9              | NM_194462                   | 0.000425636                     | 4.3245                              |
| Tmem87a            | NM_001110496                | 3.54E-05                        | 4.27191                             |
| Wdfy1              | NM_001111279                | 6.30E-05                        | 4.24885                             |
| Vcan               | NM_001081249                | 2.98E-06                        | 4.24841                             |
| Hdlbp              | NM_133808                   | 6.03E-05                        | 4.23998                             |
| Ddx6               | NM_001110826                | 1.32E-05                        | 4.1653                              |
| ---                | ---                         | 1.03E-05                        | 4.12114                             |
| Wdfy1              | NM_001111279                | 1.78E-05                        | 4.05557                             |
| Tbx20              | NM_020496                   | 8.25E-06                        | 4.02477                             |
| Kctd12b            | NM_175429                   | 0.000272331                     | 3.99547                             |
| Smg1               | NM_001031814                | 8.03E-06                        | 3.99223                             |
| Esco1              | NM_001081222                | 5.60E-07                        | 3.97212                             |
| Prpf40a            | NM_018785                   | 0.000214226                     | 3.97068                             |
| ---                | ---                         | 0.00189834                      | 3.92891                             |
| Ptpn11             | NM_001109992                | 2.76E-06                        | 3.91442                             |
| Rblcc1             | NM_009826                   | 3.91E-07                        | 3.88345                             |
| Pldn               | NM_019788                   | 0.000161466                     | 3.85832                             |
| Atrx               | NM_009530                   | 2.19E-05                        | 3.8182                              |
| Col12a1            | NM_007730                   | 6.00E-05                        | 3.77973                             |

|               |              |             |         |
|---------------|--------------|-------------|---------|
| Kif5b         | NM_008448    | 0.000203057 | 3.70003 |
| Eif4g1        | NM_001005331 | 1.94E-06    | 3.50492 |
| LOC100046693  | NM_001033529 | 0.00013886  | 3.47866 |
| Pabpn1        | NM_019402    | 0.000545726 | 3.46646 |
| Pdlim5        | NM_019808    | 7.37E-06    | 3.4436  |
| Tmx4          | NM_029148    | 0.00026493  | 3.38675 |
| Dlc1          | NM_015802    | 0.00537448  | 3.37843 |
| Star          | NM_011485    | 0.000148784 | 3.36429 |
| Nucks1        | NM_001145804 | 0.000172551 | 3.36395 |
| Arfgef1       | NM_001102430 | 3.09E-06    | 3.34462 |
| Gmfb          | NM_022023    | 0.000176874 | 3.27977 |
| Secisbp2l     | NM_177608    | 2.41E-06    | 3.27432 |
| Dnmt3a        | NM_007872    | 1.50E-05    | 3.26737 |
| Vcan          | NM_001081249 | 2.38E-05    | 3.25133 |
| Akap9         | NM_194462    | 9.32E-06    | 3.25095 |
| Serpine1      | NM_008871    | 0.000827879 | 3.23788 |
| Pcmt1         | NM_183028    | 0.00106295  | 3.22797 |
| 4933411K20Rik | NM_025747    | 0.000131025 | 3.20764 |
| Clip1         | NM_019765    | 3.59E-05    | 3.18863 |
| Cep350        | NM_001039184 | 0.000521254 | 3.17751 |
| Gm3579        | XM_001477842 | 8.45E-06    | 3.17403 |
| Acbd3         | NM_133225    | 0.000877801 | 3.1572  |
| 4921513D23Rik | NM_001081154 | 0.0330365   | 3.11348 |
| Rrm2b         | NM_199476    | 0.000707658 | 3.11302 |
| Wnk1          | NM_198703    | 5.32E-05    | 3.09397 |
| ---           | ---          | 3.68E-06    | 3.09182 |
| Sprr1a        | NM_009264    | 0.000611138 | 3.08901 |
| Rrm2b         | NM_199476    | 1.16E-05    | 3.05221 |
| Xiap          | NM_009688    | 3.75E-06    | 3.04126 |
| Col8a2        | NM_199473    | 0.00293465  | 3.01363 |
| Nox4          | NM_015760    | 0.0277003   | 2.97923 |
| Vps35         | NM_022997    | 5.69E-05    | 2.94892 |
| Hspa4         | NM_008300    | 0.00167403  | 2.94694 |
| Cxcl14        | NM_019568    | 0.00250135  | 2.91925 |
| Clip1         | NM_019765    | 1.06E-05    | 2.91734 |
| Lims1         | NM_026148    | 0.000139128 | 2.90441 |
| Inpp4b        | NM_001024617 | 5.28E-05    | 2.86944 |
| Ldb3          | NM_001039071 | 3.53E-05    | 2.86717 |
| Ccl21a        | NM_011124    | 0.0130708   | 2.85431 |
| Rab14         | NM_026697    | 0.000422926 | 2.84076 |
| Prkg1         | NM_001013833 | 0.000311295 | 2.8127  |
| Cysltr1       | NM_021476    | 0.000428182 | 2.80715 |

|               |              |             |         |
|---------------|--------------|-------------|---------|
| AI317158      | ---          | 0.0253236   | 2.80514 |
| Pdlim5        | NM_019808    | 4.98E-05    | 2.79891 |
| Mid1          | NM_010797    | 0.00797188  | 2.79305 |
| Aplp2         | NM_001102455 | 0.00318844  | 2.77237 |
| Ceacam1       | NM_001039185 | 2.04E-05    | 2.77172 |
| Rdx           | NM_001104616 | 0.000104964 | 2.76789 |
| Plcb4         | NM_013829    | 0.000185511 | 2.76307 |
| Spc25         | NM_025565    | 0.00779986  | 2.73189 |
| Zfp770        | NM_175466    | 9.37E-05    | 2.72525 |
| Rcan1         | NM_001081549 | 0.0017568   | 2.72307 |
| 2810474O19Rik | NM_026054    | 0.00133211  | 2.69662 |
| Timp1         | NM_001044384 | 0.000362784 | 2.68659 |
| Tbc1d15       | NM_025706    | 0.000976679 | 2.68243 |
| Col14a1       | NM_181277    | 5.40E-05    | 2.66536 |
| Kdm5a         | NM_145997    | 0.0003337   | 2.65845 |
| Cp            | NM_001042611 | 0.000249932 | 2.63273 |
| Endod1        | NM_028013    | 0.00114971  | 2.63177 |
| ---           | ---          | 0.00014987  | 2.58826 |
| Amd1          | NM_009665    | 0.000116435 | 2.56593 |
| Qk            | NM_001159516 | 0.000109229 | 2.54604 |
| Emp2          | NM_007929    | 1.81E-05    | 2.53682 |
| Rab4a         | NM_009003    | 4.91E-05    | 2.53568 |
| Myl1          | NM_001113387 | 0.000120876 | 2.52029 |
| Rbm5          | NM_148930    | 0.00709287  | 2.50206 |
| Tmx4          | NM_029148    | 0.000252308 | 2.49308 |
| Msi2          | NM_054043    | 0.000627749 | 2.49148 |
| Dusp18        | NM_173745    | 0.00114145  | 2.48799 |
| Pggt1b        | NM_172627    | 0.003346    | 2.4761  |
| Klhl24        | NM_029436    | 0.00172599  | 2.47535 |
| Smc6          | NM_025695    | 0.000526206 | 2.47312 |
| Prrx1         | NM_001025570 | 0.000278933 | 2.46649 |
| G530011O06Rik | NM_001039559 | 0.00722142  | 2.4478  |
| Bach1         | NM_007520    | 8.63E-05    | 2.43543 |
| Rap2b         | NM_028712    | 1.66E-05    | 2.43161 |
| Kitl          | NM_013598    | 0.00455002  | 2.4262  |
| Eid1          | NM_025613    | 8.54E-06    | 2.42457 |
| Bclaf1        | NM_001025392 | 0.000155041 | 2.42282 |
| Cenpp         | NM_025495    | 0.00318431  | 2.37892 |
| Dnmt3a        | NM_007872    | 9.72E-05    | 2.37522 |
| Dzip3         | NM_001110017 | 0.000798122 | 2.3388  |
| Rsrc2         | NM_001005523 | 0.000263743 | 2.3319  |
| Acbd3         | NM_133225    | 0.00167309  | 2.33168 |

|               |              |             |         |
|---------------|--------------|-------------|---------|
| Sspn          | NM_010656    | 0.00212726  | 2.32674 |
| Cks2          | NM_025415    | 0.0104984   | 2.32643 |
| Per2          | NM_011066    | 0.00630975  | 2.31032 |
| Fubp1         | NM_057172    | 0.000386223 | 2.30872 |
| Papola        | NM_011112    | 0.0102874   | 2.30779 |
| Zfp91         | NM_053009    | 0.000345206 | 2.30732 |
| 1200015M12Rik | NR_002860    | 0.00229765  | 2.30394 |
| Slc12a2       | NM_009194    | 0.000552301 | 2.30018 |
| Dzip3         | NM_001110017 | 0.00010873  | 2.30017 |
| Tpm1          | NM_001164248 | 0.0110317   | 2.29592 |
| Plcx2         | NM_001134480 | 0.00778052  | 2.29436 |
| Lman1         | NM_001172062 | 1.38E-05    | 2.29208 |
| Rab4a         | NM_009003    | 0.0016265   | 2.2892  |
| LOC100046891  | NM_001164041 | 0.000125108 | 2.28561 |
| Hspa1b        | NM_010478    | 0.00974591  | 2.28547 |
| Hmgxb4        | NM_178017    | 0.000261996 | 2.27966 |
| Rrm2          | NM_009104    | 0.00315562  | 2.27369 |
| Nr1d2         | NM_011584    | 1.06E-05    | 2.26926 |
| Thoc2         | NM_001033422 | 2.96E-05    | 2.26077 |
| Prkaa2        | NM_178143    | 0.00105125  | 2.25436 |
| Sfrp1         | NM_013834    | 0.000133967 | 2.24107 |
| Acp1          | NM_001110239 | 3.98E-05    | 2.24082 |
| Lrrcc1        | NM_001163579 | 0.0106022   | 2.23525 |
| Ubxn4         | NM_026390    | 0.000297943 | 2.2279  |
| Tmod3         | NM_016963    | 0.000142978 | 2.22774 |
| Ammecr1       | NM_019496    | 0.0205166   | 2.21961 |
| Dnajc2        | NM_009584    | 0.000284001 | 2.2192  |
| Slc6a6        | NM_009320    | 3.05E-05    | 2.21441 |
| Nppb          | NM_008726    | 0.00286831  | 2.21335 |
| Cacna2d1      | NM_001110843 | 0.00314632  | 2.2117  |
| Ceacam1       | NM_001039185 | 0.000915566 | 2.20863 |
| Cks2          | NM_025415    | 0.00467499  | 2.20276 |
| Ube2c         | NM_026785    | 0.00146685  | 2.1925  |
| Luzp1         | NM_024452    | 0.000750161 | 2.1846  |
| Ednrb         | NM_001136061 | 0.00146727  | 2.18331 |
| Tmod3         | NM_016963    | 0.00094629  | 2.18064 |
| Klhl24        | NM_029436    | 0.000640552 | 2.16735 |
| Pdlim5        | NM_019808    | 2.28E-06    | 2.16301 |
| Gprc5b        | NM_022420    | 0.00137785  | 2.15669 |
| Smarca5       | NM_053124    | 4.05E-05    | 2.15551 |
| Npr3          | NM_001039181 | 0.00440336  | 2.15534 |
| Cntd1         | NM_026562    | 0.00509558  | 2.15233 |

|               |              |             |         |
|---------------|--------------|-------------|---------|
| Far1          | NM_026143    | 3.40E-05    | 2.14397 |
| ---           | ---          | 0.00104848  | 2.14252 |
| Ppm1k         | NM_175523    | 0.00213065  | 2.13861 |
| Zfp644        | NM_026856    | 0.000174913 | 2.13554 |
| Lpgat1        | NM_001134829 | 6.03E-06    | 2.11581 |
| Zbtb7a        | NM_010731    | 0.00400226  | 2.1141  |
| 1110057K04Rik | NM_001167767 | 0.0126342   | 2.11147 |
| Slc8a1        | NM_001112798 | 6.41E-05    | 2.11129 |
| Ap3b1         | NM_009680    | 3.42E-05    | 2.1111  |
| Ankrd11       | NM_001081379 | 8.82E-05    | 2.11012 |
| Cpd           | NM_007754    | 0.000640175 | 2.10999 |
| Smc4          | NM_133786    | 0.000193022 | 2.10793 |
| Rora          | NM_013646    | 0.000647888 | 2.09812 |
| Zwint         | NM_025635    | 0.00210555  | 2.09659 |
| Shisa3        | NM_001033415 | 0.0262209   | 2.09581 |
| Zc3h15        | NM_026934    | 0.000740445 | 2.09523 |
| Ankrd32       | NM_134071    | 0.0123039   | 2.09112 |
| Nupr1         | NM_019738    | 0.0149056   | 2.08999 |
| Lgals3        | NM_001145953 | 0.0192424   | 2.08441 |
| Sdpr          | NM_138741    | 0.000826946 | 2.0834  |
| Taok1         | NM_144825    | 0.00456135  | 2.07711 |
| Usp1          | NM_146144    | 0.0152439   | 2.07423 |
| Arid4b        | NM_194262    | 0.000618213 | 2.07239 |
| Lpgat1        | NM_001134829 | 5.52E-06    | 2.0713  |
| Nmral1        | NM_026393    | 0.00125697  | 2.06521 |
| Kif1b         | NM_008441    | 0.000347092 | 2.06463 |
| AI225934      | ---          | 0.000108357 | 2.06378 |
| Kdm5a         | NM_145997    | 0.000515417 | 2.05679 |
| Srrm2         | NM_175229    | 0.000354894 | 2.05611 |
| Hsp90aa1      | NM_010480    | 0.000106369 | 2.04758 |
| Lnpep         | NM_172827    | 0.00107594  | 2.04709 |
| Rp2h          | NM_133669    | 0.00057038  | 2.04611 |
| Stk35         | NM_001038635 | 0.00139965  | 2.04022 |
| Hbegf         | NM_010415    | 0.000450934 | 2.03811 |
| Serpina3n     | NM_009252    | 0.00963898  | 2.03724 |
| Synpo2l       | NM_175132    | 0.0136906   | 2.02957 |
| Ppp1r12a      | NM_027892    | 0.00285979  | 2.02559 |
| 1200003I10Rik | NR_002860    | 0.00598268  | 2.02382 |
| Ddx46         | NM_145975    | 0.00212833  | 2.02367 |
| Obfc2a        | NM_028696    | 3.69E-05    | 2.02279 |
| Mfap5         | NM_015776    | 0.0204091   | 2.02256 |
| Shisa3        | NM_001033415 | 0.0117766   | 2.01166 |

|              |              |             |         |
|--------------|--------------|-------------|---------|
| Per3         | NM_011067    | 0.00404068  | 2.00907 |
| Map3k2       | NM_011946    | 0.0024393   | 2.00221 |
| Snca         | NM_001042451 | 0.00669727  | 2.00059 |
| Bhlhe40      | NM_011498    | 0.000775338 | 1.99999 |
| Ceacam1      | NM_001039185 | 0.000165183 | 1.99797 |
| Hbegf        | NM_010415    | 0.000210996 | 1.99735 |
| Mef2c        | NM_001170537 | 0.00300452  | 1.99605 |
| Cul5         | NM_001161618 | 0.000373181 | 1.99263 |
| Rrm2         | NM_009104    | 0.00314755  | 1.98809 |
| No18         | NM_001081350 | 0.00231968  | 1.98792 |
| Brd2         | NM_001025387 | 0.00356456  | 1.98746 |
| Ttc3         | NM_009441    | 0.00199396  | 1.98439 |
| Ash11        | NM_138679    | 2.30E-05    | 1.98245 |
| Zfand5       | NM_009551    | 0.000955927 | 1.98159 |
| Gtpbp4       | NM_027000    | 9.68E-05    | 1.98096 |
| Trove2       | NM_013835    | 8.80E-07    | 1.97846 |
| Zc3h15       | NM_026934    | 0.000942965 | 1.9766  |
| Mpp5         | NM_019579    | 0.000190041 | 1.97649 |
| Acp1         | NM_001110239 | 6.14E-05    | 1.97322 |
| Obfc2a       | NM_028696    | 0.000501443 | 1.97299 |
| Klf6         | NM_011803    | 0.00881439  | 1.97144 |
| Slc12a2      | NM_009194    | 9.88E-05    | 1.96989 |
| LOC100043998 | NM_133780    | 0.00585733  | 1.9692  |
| Clec1a       | NM_175526    | 0.00181746  | 1.96782 |
| Arhgap5      | NM_009706    | 0.000188761 | 1.96587 |
| Ms4a6d       | NM_026835    | 0.0116675   | 1.96162 |
| Fgl2         | NM_008013    | 0.00242597  | 1.95744 |
| Smarcc1      | NM_009211    | 0.000237035 | 1.95283 |
| Mtpn         | NM_008098    | 0.000528599 | 1.95198 |
| Dep1         | ---          | 0.00694361  | 1.95142 |
| Golga1       | NM_029793    | 0.00224     | 1.94556 |
| Arid4b       | NM_194262    | 0.00138844  | 1.94402 |
| Slk          | NM_001164639 | 1.61E-05    | 1.94396 |
| Clic5        | NM_172621    | 0.000333765 | 1.93872 |
| Efh2         | NM_025994    | 0.000326255 | 1.93425 |
| Zfp445       | NM_173364    | 0.0203325   | 1.93189 |
| Clca1        | NM_009899    | 0.00883244  | 1.92998 |
| Tor1b        | NM_133673    | 0.000900728 | 1.92935 |
| Arid4b       | NM_194262    | 3.52E-05    | 1.92589 |
| Fam26e       | NM_178908    | 0.00146864  | 1.92557 |
| Nop58        | NM_018868    | 0.00105787  | 1.92465 |
| Cno          | NM_133724    | 0.00291219  | 1.91976 |



|               |              |             |         |
|---------------|--------------|-------------|---------|
| Nt5e          | NM_011851    | 0.00597931  | 1.91686 |
| Gcap14        | NM_027045    | 0.000154874 | 1.91649 |
| Braf          | NM_139294    | 0.001536    | 1.91558 |
| Xrn2          | NM_011917    | 0.0295098   | 1.91496 |
| Ino80         | NM_026574    | 7.64E-05    | 1.91427 |
| Naa15         | NM_053089    | 0.000420074 | 1.91318 |
| Nupr1         | NM_019738    | 0.0137834   | 1.90928 |
| Snca          | NM_001042451 | 0.00646163  | 1.90763 |
| Ttc14         | NM_025978    | 0.00121497  | 1.90713 |
| Cebpd         | NM_007679    | 0.0460137   | 1.90687 |
| Sfrs18        | NM_025669    | 0.000445129 | 1.90582 |
| A530088H08Rik | NM_178656    | 0.0178414   | 1.90382 |
| Hspa4l        | NM_011020    | 0.000170031 | 1.90265 |
| Ankrd11       | NM_001081379 | 0.00535774  | 1.89936 |
| Csnk2a1       | NM_007788    | 0.000518619 | 1.89823 |
| Dusp3         | NM_028207    | 0.000495052 | 1.89479 |
| Bptf          | NM_176850    | 2.50E-05    | 1.89298 |
| Ccdc80        | NM_026439    | 0.000934409 | 1.89186 |
| Gadd45g       | NM_011817    | 0.010809    | 1.89005 |
| Nr3c1         | NM_008173    | 0.000772594 | 1.88896 |
| 4932431P20Rik | NM_001111282 | 0.00261166  | 1.88816 |
| Zfp106        | NM_011743    | 0.00152321  | 1.88786 |
| Cab39         | NM_133781    | 0.000160227 | 1.88721 |
| Apod          | NM_007470    | 0.0102325   | 1.88609 |
| A230046K03Rik | NM_001033375 | 0.00171735  | 1.88558 |
| Fytd1         | NM_001159349 | 0.00125167  | 1.87821 |
| Nktr          | NM_010918    | 0.00138401  | 1.87404 |
| Cxcr6         | NM_030712    | 7.95E-05    | 1.87342 |
| Pdlim5        | NM_019808    | 0.000894988 | 1.86553 |
| Obfc2a        | NM_028696    | 0.00798188  | 1.86433 |
| Zfand5        | NM_009551    | 8.89E-05    | 1.8562  |
| Fhl1          | NM_001077361 | 1.33E-05    | 1.85524 |
| Arglu1        | NM_176849    | 0.0023722   | 1.85307 |
| Ceacam1       | NM_001039185 | 0.00227636  | 1.85238 |
| Sema3d        | NM_028882    | 0.0150598   | 1.85096 |
| Zfp809        | NM_001164624 | 0.00432028  | 1.85052 |
| Coq10b        | NM_001039710 | 2.73E-05    | 1.85009 |
| Hnrnpab       | NM_001048061 | 0.0104004   | 1.84944 |
| Igfbp3        | NM_008343    | 0.0026695   | 1.84917 |
| Ankrd12       | NM_001025572 | 0.00123872  | 1.84887 |
| Gm7536        | XM_975156    | 0.00148015  | 1.84858 |
| Fgl2          | NM_008013    | 0.0120818   | 1.84809 |

|               |              |             |         |
|---------------|--------------|-------------|---------|
| Slmap         | NM_032008    | 0.000815163 | 1.84696 |
| Ahcyl1        | NM_145542    | 5.65E-05    | 1.84613 |
| Rnf20         | NM_001163263 | 0.000392485 | 1.84453 |
| Abra          | NM_175456    | 0.0169451   | 1.84284 |
| Eif4g2        | NM_001040131 | 0.000347129 | 1.84222 |
| Efcab7        | NM_145549    | 7.67E-05    | 1.84166 |
| Scaper        | NM_001081341 | 0.000552903 | 1.84093 |
| Tef           | NM_017376    | 0.00284327  | 1.83911 |
| Dnajc3        | NM_008929    | 0.000199384 | 1.83744 |
| Etnk1         | NM_029250    | 0.0101871   | 1.83645 |
| Ino80d        | NM_001081436 | 0.000136506 | 1.83609 |
| Gmfb          | NM_022023    | 4.84E-05    | 1.83585 |
| Loxl2         | NM_033325    | 0.0126559   | 1.83581 |
| Cd2ap         | NM_009847    | 0.00585549  | 1.83338 |
| Chd2          | NM_001081345 | 9.37E-05    | 1.82649 |
| Utrn          | NM_011682    | 0.00269396  | 1.8255  |
| Kif1b         | NM_008441    | 3.41E-06    | 1.82471 |
| Zbtb16        | NM_001033324 | 0.00467027  | 1.82447 |
| 4933436C20Rik | NR_033641    | 0.00748859  | 1.82385 |
| Rtn4          | NM_024226    | 0.00279021  | 1.82097 |
| Cd44          | NM_001039150 | 0.00381587  | 1.81916 |
| Sfrs18        | NM_025669    | 0.00293434  | 1.81616 |
| Hspa1b        | NM_010478    | 0.0335541   | 1.81572 |
| Ubxn2a        | NM_145441    | 0.00324835  | 1.81527 |
| Fbxw2         | NM_001164768 | 0.000430525 | 1.81347 |
| Tmem100       | NM_026433    | 0.0132719   | 1.81202 |
| Hdlbp         | NM_133808    | 7.36E-05    | 1.81172 |
| Vgll2         | NM_153786    | 0.0137286   | 1.81136 |
| Jmy           | NM_021310    | 0.00298466  | 1.80687 |
| Nabl          | NM_028757    | 0.000361163 | 1.80086 |
| Dpysl3        | NM_001136086 | 0.011981    | 1.79976 |
| Mmp3          | NM_010809    | 0.0114433   | 1.79935 |
| Ssb           | NM_001110145 | 0.00430399  | 1.79783 |
| Kif1b         | NM_008441    | 0.000490271 | 1.79749 |
| Cd24a         | NM_009846    | 0.00998903  | 1.79732 |
| Zfp52         | NM_144515    | 8.81E-07    | 1.79549 |
| Ms4a6d        | NM_026835    | 0.0184979   | 1.79405 |
| Mga           | NM_001164274 | 0.005043    | 1.79291 |
| Lztfl1        | NM_033322    | 0.00013546  | 1.79147 |
| Bat2l2        | NM_001081290 | 0.00984922  | 1.79011 |
| Eif5b         | NM_198303    | 3.56E-05    | 1.78595 |
| 2010109K11Rik | NM_001162903 | 6.49E-05    | 1.78307 |

|               |              |             |         |
|---------------|--------------|-------------|---------|
| Ddx3y         | NM_012008    | 5.02E-05    | 1.78074 |
| Cyb561        | NM_007805    | 0.000240395 | 1.77912 |
| Pde1a         | NM_001009978 | 0.0045147   | 1.77651 |
| Cul5          | NM_001161618 | 0.000273768 | 1.77624 |
| Hist2h2aa1    | NM_013549    | 0.00134355  | 1.77299 |
| ---           | ---          | 0.0386372   | 1.77282 |
| Cd24a         | NM_009846    | 0.00692762  | 1.77214 |
| Hspa1a        | NM_010479    | 0.016546    | 1.7713  |
| Msi2          | NM_054043    | 3.96E-05    | 1.77086 |
| Obfc2a        | NM_028696    | 0.00073009  | 1.76974 |
| 1500009L16Rik | NM_001145198 | 0.00631383  | 1.76941 |
| Ncor1         | NM_011308    | 0.000222568 | 1.76735 |
| Tspan4        | NM_053082    | 0.000712209 | 1.76291 |
| Nabl          | NM_028757    | 0.000887715 | 1.76234 |
| Gm129         | NM_001033302 | 0.0022918   | 1.76136 |
| Il6st         | NM_010560    | 0.00175889  | 1.75986 |
| Rbm5          | NM_148930    | 0.0463713   | 1.75925 |
| Cdk11         | NM_183294    | 0.00103215  | 1.75811 |
| Fnip1         | NM_173753    | 0.00481175  | 1.75751 |
| Malat1        | NR_002847    | 0.025008    | 1.75742 |
| ---           | ---          | 0.000261513 | 1.75677 |
| Ctgf          | NM_010217    | 0.0482205   | 1.75661 |
| C730026J16    | ---          | 1.67E-05    | 1.7564  |
| Plxna2        | NM_008882    | 0.00997358  | 1.75457 |
| Ift74         | NM_026319    | 0.00419838  | 1.75251 |
| Maff          | NM_010755    | 0.0022551   | 1.75197 |
| Eif1a         | NM_010120    | 0.00176637  | 1.75106 |
| Tmem206       | NM_025864    | 0.00520761  | 1.74939 |
| Mfap5         | NM_015776    | 0.0347882   | 1.74789 |
| Mtap1b        | NM_008634    | 0.000443539 | 1.74547 |
| Wisp2         | NM_016873    | 0.0479055   | 1.7435  |
| Cntf          | NM_053009    | 0.00783044  | 1.74275 |
| Zfml          | NM_001166371 | 0.000630576 | 1.73903 |
| S100a10       | NM_009112    | 0.00565792  | 1.73547 |
| Efh2          | NM_025994    | 0.00113607  | 1.73388 |
| Ankle2        | NM_027922    | 0.000354649 | 1.73295 |
| ---           | ---          | 0.00681151  | 1.73238 |
| Enah          | NM_001083120 | 0.0158491   | 1.73151 |
| Dynlt3        | NM_025975    | 0.00480405  | 1.73134 |
| ---           | ---          | 0.0244301   | 1.72926 |
| Ankrd12       | NM_001025572 | 0.00214583  | 1.72858 |
| Ogn           | NM_008760    | 0.000913549 | 1.72777 |

|               |              |             |         |
|---------------|--------------|-------------|---------|
| Sfrs2ip       | NM_028148    | 0.000117048 | 1.72767 |
| Zbed6         | NM_001166552 | 0.000888978 | 1.72485 |
| Per3          | NM_011067    | 0.0303727   | 1.72268 |
| Akap2         | NM_001035532 | 0.000175937 | 1.72115 |
| Dnttip2       | NM_153806    | 0.000542924 | 1.71776 |
| Tip2          | NM_009418    | 0.00423271  | 1.71646 |
| Hbb-b2        | NM_016956    | 0.001533    | 1.71548 |
| Crem          | NM_001110850 | 0.00455121  | 1.71535 |
| Rictor        | NM_030168    | 0.00216098  | 1.71312 |
| Zfp697        | NM_172863    | 0.00252322  | 1.71271 |
| Nlrc3         | NM_001081280 | 0.0424926   | 1.71201 |
| 2810474O19Rik | NM_026054    | 0.0370064   | 1.71159 |
| Hsp90b1       | NM_011631    | 0.000741485 | 1.71121 |
| Eif5          | NM_173363    | 0.00026251  | 1.71036 |
| Cd9912        | NM_138309    | 0.00198979  | 1.70859 |
| Zbtb16        | NM_001033324 | 0.0456431   | 1.70769 |
| Cd44          | NM_001039150 | 0.0169577   | 1.70711 |
| Rnf168        | NM_027355    | 0.00136337  | 1.70708 |
| Fytd1         | NM_001159349 | 0.000223254 | 1.70613 |
| Whamm         | NM_001004185 | 0.000147044 | 1.70394 |
| Fam126b       | NM_172513    | 0.000435481 | 1.70092 |
| Sfrp1         | NM_013834    | 0.0353166   | 1.69964 |
| Mpp7          | NM_001081287 | 0.00104069  | 1.69859 |
| Zfp871        | NM_172458    | 0.0371576   | 1.69842 |
| Pde4b         | NM_001177980 | 0.004558    | 1.69767 |
| Usp36         | NM_001033528 | 0.0125222   | 1.6971  |
| D1Erttd564e   | ---          | 0.00305582  | 1.69364 |
| Rnf115        | NM_026406    | 0.000826658 | 1.69296 |
| Hsd17b7       | NM_010476    | 0.00136404  | 1.69209 |
| Uck2          | NM_030724    | 0.0010324   | 1.68794 |
| Pppde1        | NM_024282    | 0.00687679  | 1.68793 |
| Ckap4         | NM_175451    | 0.00594807  | 1.68691 |
| 2610101N10Rik | NM_001114977 | 0.000176109 | 1.68687 |
| Sdad1         | NM_172713    | 0.00102981  | 1.68625 |
| Vcan          | NM_001081249 | 0.00681834  | 1.68542 |
| Nus1          | NM_030250    | 0.000271699 | 1.68501 |
| Sdc4          | NM_011521    | 0.0031998   | 1.68283 |
| N6amt2        | NM_026526    | 0.00033849  | 1.6812  |
| Obfc2a        | NM_028696    | 0.00197258  | 1.67885 |
| Cd55          | NM_010016    | 0.00141204  | 1.67807 |
| Zfand5        | NM_009551    | 0.000437794 | 1.67801 |
| Uxs1          | NM_026430    | 0.0254343   | 1.67791 |

|               |              |             |         |
|---------------|--------------|-------------|---------|
| Tgfb2         | NM_009367    | 0.0366239   | 1.67788 |
| Zbtb16        | NM_001033324 | 0.010267    | 1.67691 |
| Nbeal1        | NM_173444    | 0.000729793 | 1.67635 |
| Ifrd1         | NM_013562    | 0.000336756 | 1.67489 |
| Dnajc24       | NM_026992    | 0.0277582   | 1.67482 |
| A230046K03Rik | NM_001033375 | 0.00129534  | 1.67416 |
| Ahcy11        | NM_145542    | 0.00361527  | 1.67342 |
| Luc71         | NM_025881    | 0.0164063   | 1.67303 |
| Bambi         | NM_026505    | 0.00106619  | 1.67282 |
| Gchfr         | NM_177157    | 0.0170846   | 1.67211 |
| ---           | ---          | 0.00550782  | 1.67106 |
| Prkacb        | NM_001164198 | 0.000218979 | 1.66946 |
| Dynlt3        | NM_025975    | 0.00232938  | 1.66875 |
| G0s2          | NM_008059    | 0.0112292   | 1.66747 |
| Rabgap11      | NM_001038621 | 0.00214696  | 1.66727 |
| LOC100270747  | ---          | 0.0018282   | 1.66707 |
| Mrpl51        | NM_025595    | 0.000352486 | 1.66593 |
| Ttc3          | NM_009441    | 0.00688655  | 1.66578 |
| Cenpa         | NM_007681    | 0.00131579  | 1.66534 |
| Dnajb4        | NM_025926    | 0.00126163  | 1.65938 |
| Tbl1xr1       | NM_030732    | 1.97E-05    | 1.65796 |
| 2010111I01Rik | NM_028079    | 0.00105878  | 1.65648 |
| Lrp6          | NM_008514    | 0.00296005  | 1.65553 |
| Ptpn2         | NM_001127177 | 0.00129282  | 1.65438 |
| 2210403K04Rik | NR_030711    | 0.00480946  | 1.6526  |
| Rasa1         | NM_145452    | 0.000470093 | 1.65053 |
| Plscr1        | NM_011636    | 0.00606461  | 1.65031 |
| Ccnd1         | NM_007631    | 0.0259782   | 1.65027 |
| Pdap1         | NM_001033313 | 0.00126004  | 1.64999 |
| ---           | ---          | 0.043262    | 1.64923 |
| Btg2          | NM_007570    | 0.0261161   | 1.64748 |
| Sntb2         | NM_009229    | 0.00104651  | 1.64663 |
| Ilf3          | NM_001042707 | 0.000897825 | 1.64555 |
| Npr3          | NM_001039181 | 0.00104342  | 1.64467 |
| Filip1        | NM_001081243 | 0.00777764  | 1.64287 |
| Olf558        | NM_147093    | 0.00735235  | 1.6423  |
| Pde8a         | NM_008803    | 3.38E-05    | 1.64187 |
| Htra4         | NM_001081187 | 9.12E-05    | 1.64171 |
| Mad2l1        | NM_019499    | 0.00877517  | 1.63836 |
| Cdv3          | NM_001134426 | 0.000115998 | 1.638   |
| 8430408G22Rik | NM_001166580 | 0.0394308   | 1.63729 |
| Col4a3bp      | NM_001164222 | 0.00427412  | 1.63539 |

|               |              |             |         |
|---------------|--------------|-------------|---------|
| Pdcd10        | NM_019745    | 0.00010889  | 1.63515 |
| A230046K03Rik | NM_001033375 | 0.00149062  | 1.63399 |
| Atp2b1        | NM_026482    | 0.00376406  | 1.63347 |
| Thoc2         | NM_001033422 | 4.73E-05    | 1.63214 |
| Uck2          | NM_030724    | 0.00184551  | 1.63208 |
| Rassf4        | NM_178045    | 0.0177328   | 1.63114 |
| Mmrn1         | NM_001163507 | 0.0265143   | 1.6291  |
| S100a10       | NM_009112    | 0.00199573  | 1.62854 |
| Cops2         | NM_009939    | 0.0019746   | 1.6282  |
| ---           | ---          | 0.00584566  | 1.62816 |
| Cda           | NM_028176    | 0.00146732  | 1.62688 |
| Fam122b       | NM_001166365 | 0.0220594   | 1.62601 |
| Crk           | NM_133656    | 0.000602783 | 1.62565 |
| Ptar1         | NM_028208    | 0.0162063   | 1.62532 |
| Atpif1        | NM_007512    | 0.00364236  | 1.62516 |
| Panx1         | NM_019482    | 0.0210513   | 1.62379 |
| Orc2l         | NM_001025378 | 0.00678702  | 1.62358 |
| Lrp8          | NM_001080926 | 0.0243518   | 1.61901 |
| Atp6v1h       | NM_133826    | 0.00358113  | 1.61889 |
| Zbtb3         | NM_001098237 | 0.000439876 | 1.61755 |
| Kitl          | NM_013598    | 0.00565619  | 1.61746 |
| Slc1a4        | NM_018861    | 0.000585615 | 1.61737 |
| Coq10b        | NM_001039710 | 0.00638125  | 1.61729 |
| Rasl11b       | NM_026878    | 0.00690501  | 1.61354 |
| Plscr1        | NM_011636    | 0.00418422  | 1.61055 |
| Ceacam1       | NM_001039185 | 0.0156936   | 1.6093  |
| 2310057M21Rik | NM_026655    | 0.00616691  | 1.60769 |
| Zbtb38        | NM_175537    | 0.00237901  | 1.60728 |
| Parp4         | NM_001145978 | 6.79E-05    | 1.60592 |
| Zc3h11a       | NM_144530    | 0.00572522  | 1.60514 |
| Belaf1        | NM_001025392 | 0.00224028  | 1.60471 |
| Ctla2b        | NM_001145801 | 0.0313317   | 1.60422 |
| Hspa2         | NM_001002012 | 0.0175349   | 1.60206 |
| ---           | ---          | 0.00703691  | 1.60204 |
| Kctd15        | NM_146188    | 0.000199164 | 1.60125 |
| Tm2d2         | NM_027194    | 0.0144533   | 1.60061 |
| Synpo2l       | NM_175132    | 0.0105061   | 1.59963 |
| Tatdn1        | NM_175151    | 0.00106659  | 1.5993  |
| Mtpn          | NM_008098    | 0.000918133 | 1.59893 |
| Ikbip         | NM_026166    | 0.000114201 | 1.59804 |
| Casp12        | NM_009808    | 0.0148419   | 1.59783 |
| Tbcel         | NM_173038    | 0.00742478  | 1.59555 |

|               |              |             |         |
|---------------|--------------|-------------|---------|
| 2610005L07Rik | NR_028428    | 0.0414469   | 1.59475 |
| Apold1        | NM_001109914 | 0.0227416   | 1.59433 |
| Tcerg1        | NM_001039474 | 0.00138184  | 1.59388 |
| Rabgap11      | NM_001038621 | 0.00540305  | 1.59384 |
| Rabep1        | NM_019400    | 4.46E-05    | 1.59365 |
| Akap13        | NM_029332    | 0.000381244 | 1.59337 |
| Pdcd6ip       | NM_001164677 | 0.00405265  | 1.59314 |
| Sfmbt1        | NM_001166531 | 0.00214504  | 1.59247 |
| Wdr12         | NM_021312    | 0.0014565   | 1.59185 |
| Nsa2          | NM_021552    | 0.000408181 | 1.59157 |
| Rnf160        | NM_001081068 | 0.00200592  | 1.5907  |
| Spnb2         | NM_009260    | 0.00143113  | 1.58925 |
| Snrnp48       | NM_026382    | 0.00383873  | 1.58907 |
| ---           | ---          | 0.0295211   | 1.58879 |
| Pcmt1         | NM_008786    | 0.000170524 | 1.58796 |
| Appl1         | NM_145221    | 0.00381003  | 1.58778 |
| Sdccag1       | NM_025441    | 0.00139456  | 1.58714 |
| Airm          | NR_002853    | 0.014333    | 1.58681 |
| Cbx5          | NM_001076789 | 0.00121448  | 1.58515 |
| Ccni          | NM_017367    | 0.0156386   | 1.58461 |
| Ier5          | NM_010500    | 0.0081844   | 1.58446 |
| Synpo2l       | NM_175132    | 0.0198689   | 1.58438 |
| Ppp2r3a       | NM_001161362 | 0.0149296   | 1.5842  |
| Rhobtb1       | NM_001081347 | 0.0107687   | 1.58416 |
| Trdn          | NM_029726    | 0.00018174  | 1.58382 |
| Crls1         | NM_001024385 | 0.000134537 | 1.58327 |
| Crygb         | NM_001082573 | 0.00167963  | 1.58159 |
| Rassf8        | NM_027760    | 0.000242033 | 1.58137 |
| Sf3b2         | NM_030109    | 0.0036632   | 1.58012 |
| Mllt11        | NM_019914    | 0.00142262  | 1.57987 |
| Belaf1        | NM_001025392 | 0.0181329   | 1.57679 |
| Rbm3          | NM_001166409 | 0.000235425 | 1.57666 |
| Wdr37         | NM_001039388 | 0.00722419  | 1.5761  |
| 2610030H06Rik | NM_001081356 | 0.000396258 | 1.57591 |
| Pik3r1        | NM_001024955 | 0.00310896  | 1.57564 |
| D7Erttd715e   | NR_015456    | 0.0103328   | 1.57461 |
| Tspan31       | NM_025982    | 0.000330044 | 1.57447 |
| Gm14446       | NM_001101605 | 0.00572548  | 1.57349 |
| Hn1           | NM_008258    | 0.00348661  | 1.57347 |
| A530088H08Rik | NM_178656    | 0.0229076   | 1.57344 |
| Usp34         | XM_483996    | 0.00123313  | 1.5725  |
| Zscan18       | NM_001017955 | 0.0116528   | 1.57195 |

|               |              |             |         |
|---------------|--------------|-------------|---------|
| Fam46c        | NM_001142952 | 0.00111722  | 1.57121 |
| Rnf115        | NM_026406    | 0.000913921 | 1.56993 |
| Mkrn1         | NM_018810    | 0.000279253 | 1.56906 |
| Fam164a       | NM_173181    | 0.0115208   | 1.56783 |
| C230081A13Rik | NM_172924    | 0.012209    | 1.56759 |
| Gsk3b         | NM_019827    | 0.000233417 | 1.56623 |
| Slc2a1        | NM_011400    | 0.0052852   | 1.56599 |
| Eny2          | NM_175009    | 0.00505887  | 1.5646  |
| Fbxo9         | NM_001081490 | 0.00217253  | 1.56284 |
| Gm4204        | NM_001146707 | 0.00129349  | 1.56182 |
| Dcun1d1       | NM_033623    | 0.0180356   | 1.56117 |
| Mgst1         | NM_019946    | 0.0161215   | 1.56107 |
| S100a4        | NM_011311    | 0.0182432   | 1.56062 |
| Nuak1         | NM_001004363 | 0.000364598 | 1.55897 |
| Dusp3         | NM_028207    | 0.000443848 | 1.55802 |
| Cdr2          | NM_007672    | 0.000382919 | 1.55802 |
| Pfdn1         | NM_026027    | 0.00408315  | 1.55766 |
| Ccnd2         | NM_009829    | 0.00755422  | 1.55748 |
| Gimap5        | NM_175035    | 0.000463083 | 1.55735 |
| N6amt1        | NM_001159331 | 0.00216599  | 1.55412 |
| Elf2          | NM_023502    | 0.00884988  | 1.55393 |
| Scx           | NM_198885    | 0.00536118  | 1.55252 |
| E230013L22Rik | ---          | 0.00134965  | 1.55239 |
| Pdgfc         | NM_019971    | 0.0124717   | 1.55104 |
| Fam168a       | NM_178764    | 0.0101833   | 1.54889 |
| Ceacam1       | NM_001039185 | 0.0221034   | 1.54803 |
| Chic1         | NM_009767    | 0.00196052  | 1.54782 |
| Ssb           | NM_001110145 | 0.00125538  | 1.54772 |
| D9Erttd256e   | ---          | 0.0106535   | 1.54744 |
| Mtpn          | NM_008098    | 0.000110313 | 1.54597 |
| 0610009D07Rik | NM_025323    | 0.000819737 | 1.54491 |
| Rock1         | NM_009071    | 0.00107911  | 1.54488 |
| Cyr61         | NM_010516    | 0.00847141  | 1.54387 |
| Wwtr1         | NM_001168281 | 1.67E-05    | 1.54286 |
| Ceacam1       | NM_001039185 | 0.00660732  | 1.542   |
| Naa35         | NM_030153    | 0.0107142   | 1.54138 |
| 1500017E21Rik | NR_033510    | 0.0370748   | 1.54136 |
| Samd5         | NM_177271    | 0.00176207  | 1.54123 |
| Huwe1         | NM_021523    | 0.0206788   | 1.5409  |
| Zmynd11       | NM_144516    | 0.00927238  | 1.54027 |
| Trove2        | NM_013835    | 0.000960526 | 1.53851 |
| Smarca4       | NM_001174078 | 0.0224004   | 1.53688 |



|               |              |             |         |
|---------------|--------------|-------------|---------|
| Hsp90ab1      | NM_008302    | 0.0096042   | 1.5368  |
| 7630402I04Rik | ---          | 0.0372641   | 1.53652 |
| Ggnbp2        | NM_153144    | 0.00681805  | 1.53615 |
| 0610009D07Rik | NM_025323    | 0.00222013  | 1.536   |
| Zwint         | NM_025635    | 0.00377204  | 1.53555 |
| Rnf19b        | NM_029219    | 0.00167361  | 1.53541 |
| Lbh           | NM_029999    | 0.00416521  | 1.53477 |
| Calm2         | NM_007589    | 0.00531412  | 1.53457 |
| Ddah1         | NM_026993    | 0.00650491  | 1.53453 |
| Gabpb2        | NM_029885    | 0.000472497 | 1.53452 |
| Akr1b8        | NM_008012    | 0.00335607  | 1.53415 |
| Smc2          | NM_008017    | 0.00126339  | 1.53356 |
| Dnttip2       | NM_153806    | 0.00166145  | 1.53344 |
| Tatdn1        | NM_175151    | 0.00613805  | 1.53291 |
| Pard3b        | NM_001081050 | 0.00214314  | 1.53254 |
| Kif13a        | NM_010617    | 0.00754184  | 1.53234 |
| Eif1a         | NM_010120    | 0.00120404  | 1.53121 |
| Man1a         | NM_008548    | 0.00125005  | 1.53118 |
| Phax          | NM_001162989 | 0.00914282  | 1.53072 |
| Mafk          | NM_010757    | 0.00253027  | 1.53064 |
| Tecr1         | NM_153801    | 0.00445969  | 1.53061 |
| 7-Mar         | NM_020575    | 0.00585079  | 1.53034 |
| Hmgn3         | NM_026122    | 0.0138311   | 1.5298  |
| Dusp27        | NM_001033344 | 0.0174175   | 1.52796 |
| Tmed10        | NM_026775    | 0.000522179 | 1.52793 |
| Crebbp        | NM_001025432 | 0.0136701   | 1.52722 |
| Rabgef1       | NM_019983    | 0.000705518 | 1.52552 |
| Pdik1l        | NM_001163794 | 0.00444396  | 1.52467 |
| Tmem167       | NM_025335    | 0.00455968  | 1.5246  |
| 3110005L21Rik | ---          | 0.0235354   | 1.52444 |
| 4931406P16Rik | NM_172741    | 0.0030252   | 1.52324 |
| ---           | ---          | 0.0305599   | 1.52288 |
| 2010111I01Rik | NM_028079    | 0.00622803  | 1.5218  |
| Slc2a1        | NM_011400    | 0.00749958  | 1.52077 |
| Enpp4         | NM_199016    | 0.00393923  | 1.52037 |
| Fxyd5         | NM_001111073 | 0.00870131  | 1.51999 |
| 1110034B05Rik | NM_001037742 | 0.00301293  | 1.51977 |
| Celf2         | NM_001110228 | 5.14E-05    | 1.51854 |
| Jag1          | NM_013822    | 0.0051527   | 1.5185  |
| 2810026P18Rik | XM_925560    | 0.00576363  | 1.51751 |
| Fam126b       | NM_172513    | 0.000500384 | 1.51738 |
| Nts           | NM_024435    | 0.0466106   | 1.51648 |

|               |              |             |         |
|---------------|--------------|-------------|---------|
| P4ha1         | NM_011030    | 0.00411734  | 1.51545 |
| Azin1         | NM_001102458 | 0.000966169 | 1.51518 |
| Btbd7         | NM_172806    | 0.0241992   | 1.51456 |
| Fam105b       | NM_001013792 | 0.000435697 | 1.51421 |
| Rai14         | NM_001166408 | 0.029698    | 1.51396 |
| Capza1        | NM_009797    | 0.000149903 | 1.51351 |
| Eif3c         | NM_146200    | 0.0266089   | 1.5119  |
| Phlda1        | NM_009344    | 0.0254277   | 1.51099 |
| 1700025G04Rik | NM_197990    | 0.00100478  | 1.51089 |
| Tmem204       | NM_001001183 | 0.00321583  | 1.51083 |
| Heatr6        | NM_145432    | 0.00208684  | 1.5104  |
| Grk5          | NM_018869    | 0.00319357  | 1.50975 |
| Eif2c3        | NM_153402    | 0.00622167  | 1.50747 |
| Sytl4         | NM_013757    | 0.0218986   | 1.5074  |
| Ddx10         | NM_029936    | 0.000656365 | 1.50714 |
| Pqlc3         | NM_001161111 | 0.00771163  | 1.5071  |
| Mia3          | NM_177389    | 0.04417     | 1.50317 |
| Srpk2         | NM_009274    | 0.00874074  | 1.50297 |
| Edn3          | NM_007903    | 1.71E-05    | 1.5021  |
| Amd1          | NM_009665    | 0.00746191  | 1.50184 |
| ---           | ---          | 0.00503784  | 1.5012  |
| Ptprr         | NM_001161838 | 0.0303782   | 1.50096 |
| Eny2          | NM_175009    | 0.0108162   | 1.50084 |
| Wac           | NM_001146298 | 0.0282634   | 1.50015 |
| Anxa1         | NM_010730    | 0.0280682   | 1.49967 |
| Tbca          | NM_009321    | 0.0113986   | 1.49891 |
| Pfklp         | NM_019703    | 0.00843823  | 1.49798 |
| Ccdc66        | NM_177111    | 0.0128133   | 1.49777 |
| Glr2          | NM_001038592 | 0.00734595  | 1.49718 |
| Slc22a4       | NM_019687    | 0.00650428  | 1.49717 |
| Irx3          | NM_008393    | 0.00235256  | 1.4971  |
| 1110018N20Rik | XM_901931    | 0.0228093   | 1.49697 |
| Amot          | NM_153319    | 0.000319125 | 1.49588 |
| Fam126b       | NM_172513    | 0.000564195 | 1.4956  |
| Plekha4       | NM_148927    | 0.0247472   | 1.49555 |
| Agfgl         | NM_010472    | 0.00216303  | 1.49528 |
| H2afz         | NM_016750    | 0.0122168   | 1.49454 |
| Gm7285        | NM_011300    | 0.00101797  | 1.49411 |
| Ccdc77        | NM_026028    | 0.00758126  | 1.4941  |
| Cd59a         | NM_001111060 | 0.0289091   | 1.49409 |
| Rfc4          | NM_145480    | 0.0361931   | 1.49396 |
| Prnp          | NM_011170    | 0.000494334 | 1.49393 |

|               |              |             |         |
|---------------|--------------|-------------|---------|
| Azin1         | NM_001102458 | 0.000703989 | 1.49376 |
| Rbp7          | NM_022020    | 0.0353479   | 1.49259 |
| Hsp90aa1      | NM_010480    | 0.00530125  | 1.49116 |
| Nrip1         | NM_173440    | 0.00848382  | 1.49113 |
| Il6ra         | NM_010559    | 0.000782224 | 1.49097 |
| Prpf38b       | NM_025845    | 0.00957832  | 1.49075 |
| Atxn7         | NM_139227    | 0.000342736 | 1.49033 |
| ---           | ---          | 0.000700975 | 1.48971 |
| ---           | ---          | 0.0418911   | 1.48942 |
| Map2k7        | NM_001042557 | 0.00902485  | 1.4889  |
| Cap2          | NM_026056    | 8.60E-05    | 1.48868 |
| Xrcc4         | NM_028012    | 0.0340053   | 1.4884  |
| Scoc          | NM_001039137 | 0.0177658   | 1.48802 |
| Sacs          | NM_172809    | 0.036391    | 1.48681 |
| Spsb4         | NM_145134    | 0.0386149   | 1.48669 |
| Med21         | NM_025315    | 0.00663288  | 1.48614 |
| Fahd2a        | NM_029629    | 0.0436081   | 1.48571 |
| Fabp4         | NM_024406    | 0.0392517   | 1.48523 |
| Dsel          | NM_001081316 | 0.011324    | 1.48485 |
| Lamp2         | NM_001017959 | 0.00916725  | 1.48449 |
| 2510039O18Rik | NM_029841    | 0.00299743  | 1.48398 |
| Pfkip         | NM_019703    | 0.00651082  | 1.48387 |
| Spred1        | NM_033524    | 0.0208757   | 1.48313 |
| Slc25a16      | NM_175194    | 0.00500412  | 1.4826  |
| 5730601F06Rik | NM_001082485 | 0.0191096   | 1.48243 |
| C1d           | NM_020558    | 0.00358278  | 1.48143 |
| Smc4          | NM_133786    | 0.0250314   | 1.48132 |
| Suz12         | NM_001163018 | 0.000118243 | 1.48086 |
| Nip7          | NM_001164472 | 0.00609292  | 1.48047 |
| Arpc5         | NM_026369    | 0.00175091  | 1.48041 |
| Ankrd37       | NM_001039562 | 0.0165597   | 1.47945 |
| Tbl1x         | NM_020601    | 0.0023342   | 1.47886 |
| Tgs1          | NM_054089    | 0.00565338  | 1.47876 |
| Pkdcc         | NM_134117    | 0.0326892   | 1.4787  |
| Creb3         | NM_013497    | 0.00207744  | 1.47771 |
| Slmap         | NM_032008    | 0.000873303 | 1.47771 |
| Prss44        | NM_148940    | 0.00165165  | 1.47742 |
| Fbln2         | NM_001081437 | 0.00312433  | 1.47687 |
| Sema6d        | NM_172537    | 0.00725197  | 1.47594 |
| Tnni3k        | NM_177066    | 0.00927708  | 1.47565 |
| ---           | ---          | 0.00134361  | 1.47529 |
| Wdfy3         | NM_172882    | 0.00796137  | 1.47465 |

|               |              |             |         |
|---------------|--------------|-------------|---------|
| Comtd1        | NM_026965    | 0.029927    | 1.47425 |
| Cbx5          | NM_001076789 | 0.00391147  | 1.47389 |
| Fam73a        | NM_001162375 | 0.000727807 | 1.47302 |
| Mlec          | NM_175403    | 0.000205498 | 1.47243 |
| Zbtb4         | NM_029348    | 0.00359348  | 1.47206 |
| Ehd4          | NM_133838    | 0.00133636  | 1.47191 |
| Cebpg         | NM_009884    | 0.00253947  | 1.47155 |
| Cbwd1         | NM_146097    | 0.0211548   | 1.47128 |
| Sltm          | NM_025690    | 0.00823084  | 1.47121 |
| Bcl2          | NM_009741    | 0.00067412  | 1.47096 |
| Meg3          | NR_003633    | 0.00945005  | 1.47074 |
| Pyroxd1       | NM_183165    | 0.00970502  | 1.46995 |
| Trim47        | NM_172570    | 0.0161141   | 1.4698  |
| Calm2         | NM_007589    | 0.000262819 | 1.46939 |
| Tmem29        | NM_001164683 | 0.00444279  | 1.4688  |
| Nr1d1         | NM_145434    | 0.0103269   | 1.46879 |
| 6330578E17Rik | NM_198006    | 0.00219429  | 1.46877 |
| Pja2          | NM_001025309 | 0.00333514  | 1.46831 |
| Klhl32        | NM_001033531 | 0.0399248   | 1.46776 |
| Slfn8         | NM_001167743 | 0.010203    | 1.46746 |
| Ppp2r5c       | NM_001081457 | 0.00107394  | 1.46739 |
| Fam46a        | NM_001160378 | 0.0383851   | 1.46708 |
| Smarca2       | NM_011416    | 0.00297527  | 1.46663 |
| Cdca3         | NM_013538    | 0.00347519  | 1.46608 |
| Rassf3        | NM_138956    | 0.0265737   | 1.46532 |
| Evi5          | NM_007964    | 0.000366185 | 1.46506 |
| 2310030G06Rik | NM_025865    | 0.00860433  | 1.46484 |
| Igfbp3        | NM_008343    | 0.0270625   | 1.46422 |
| Timp3         | NM_011595    | 0.0135342   | 1.46415 |
| Zfr           | NM_011767    | 0.0108099   | 1.4641  |
| Kdelr3        | NM_134090    | 0.0132753   | 1.46338 |
| Chgb          | NM_007694    | 0.00751526  | 1.46326 |
| Trdn          | NM_0297268   | 0.00534287  | 1.46286 |
| Rab27b        | NM_001082553 | 0.0401455   | 1.46188 |
| Cytl1         | NM_001081106 | 0.0138976   | 1.46158 |
| 2610039C10Rik | NM_025642    | 0.0101852   | 1.46144 |
| Hook3         | NM_207659    | 0.00525884  | 1.46031 |
| Eif2s2        | NM_026030    | 0.00183481  | 1.45958 |
| Naa16         | NM_025832    | 0.0496158   | 1.45921 |
| Zfp871        | NM_172458    | 0.0370519   | 1.45871 |
| Pon3          | NM_173006    | 0.00783273  | 1.45869 |
| ---           | ---          | 0.00329227  | 1.45858 |

|               |              |             |         |
|---------------|--------------|-------------|---------|
| Crbn          | NM_021449    | 0.00245758  | 1.45725 |
| LOC100048499  | NM_001081975 | 0.0195545   | 1.45715 |
| Slc2a1        | NM_011400    | 0.00181788  | 1.45635 |
| Srpk2         | NM_009274    | 0.011841    | 1.45599 |
| Dynll1        | NM_001177391 | 0.0133022   | 1.45472 |
| Ppp2r5c       | NM_001081457 | 0.00572166  | 1.45469 |
| Nipbl         | NM_027707    | 0.000673181 | 1.45452 |
| Sorbs2        | NM_172752    | 0.00392568  | 1.45429 |
| Bod11         | NM_001081422 | 0.0329062   | 1.45315 |
| A930005H10Rik | NR_015487    | 0.0340893   | 1.4528  |
| Mef2c         | NM_001170537 | 0.00680775  | 1.45249 |
| Dzip3         | NM_001110017 | 0.0343493   | 1.45223 |
| Ngdn          | NM_026890    | 0.0119876   | 1.45204 |
| Rfc4          | NM_145480    | 0.0234479   | 1.45076 |
| Smc6          | NM_025695    | 0.0248185   | 1.45068 |
| ---           | ---          | 0.00322655  | 1.45022 |
| Jmy           | NM_021310    | 0.0350705   | 1.44843 |
| Amn1          | NM_001113424 | 0.00364487  | 1.44837 |
| Iqgap1        | NM_016721    | 0.000552253 | 1.44717 |
| 3110001I22Rik | NM_025653    | 0.0111715   | 1.4461  |
| Fam198b       | NM_133187    | 0.00555519  | 1.44596 |
| Atp6ap2       | NM_027439    | 0.0107213   | 1.44584 |
| Suz12         | NM_001163018 | 0.00296468  | 1.44569 |
| Yars2         | NM_198246    | 0.0396163   | 1.44496 |
| Ergic2        | NM_026168    | 0.00713762  | 1.44485 |
| Masp1         | NM_008555    | 0.0168235   | 1.44357 |
| Zfx           | NM_001044386 | 0.00358194  | 1.44332 |
| 1700029F09Rik | NM_029368    | 0.013737    | 1.44278 |
| Mobk13        | NM_025283    | 0.00271233  | 1.44186 |
| Arl6          | NM_019665    | 0.0144856   | 1.44117 |
| Akap9         | NM_194462    | 0.00175311  | 1.44056 |
| Sugt1         | NM_026474    | 0.00137796  | 1.4405  |
| Slc25a36      | NM_138756    | 0.00957989  | 1.44021 |
| Eif4e3        | NM_025829    | 0.0270448   | 1.43935 |
| Thrap3        | NM_146153    | 0.00364453  | 1.43876 |
| Sdccag1       | NM_025441    | 0.0020725   | 1.43863 |
| Sfrs3         | NM_013663    | 0.0106578   | 1.43832 |
| Ubxn1         | NM_146093    | 0.00226519  | 1.43769 |
| Saps3         | NM_001164159 | 0.00765207  | 1.43746 |
| Krit1         | NM_001170552 | 0.00534102  | 1.43713 |
| Nek1          | NM_175089    | 0.000901243 | 1.43704 |
| Eif2s2        | NM_026030    | 0.00252852  | 1.43692 |

|               |              |             |         |
|---------------|--------------|-------------|---------|
| Nacc1         | NM_025788    | 0.00277758  | 1.43637 |
| Acot10        | NM_019736    | 0.00795146  | 1.43634 |
| Slc39a6       | NM_139143    | 0.01728     | 1.43626 |
| Anxa8         | NM_013473    | 0.00787388  | 1.43618 |
| Anxa8         | NM_013473    | 0.0244381   | 1.43611 |
| Magi2         | NM_001170745 | 0.0184836   | 1.43534 |
| Ube2w         | NM_025773    | 0.00282011  | 1.4353  |
| Cenpp         | NM_025495    | 0.0189685   | 1.43528 |
| Gatad2b       | NM_139304    | 0.00364039  | 1.4346  |
| Spcl1         | NM_026911    | 0.00673549  | 1.43427 |
| Rer1          | NM_026395    | 0.00658632  | 1.43374 |
| Hspa11        | NM_013558    | 0.0484375   | 1.43371 |
| Matr3         | NM_010771    | 0.00940214  | 1.43368 |
| Zfp148        | NM_011749    | 0.00867099  | 1.4326  |
| Higd1b        | NM_080846    | 0.00279477  | 1.43256 |
| Atp6v1a       | NM_007508    | 0.0170773   | 1.43222 |
| Arhgap11a     | NM_181416    | 0.0418672   | 1.43202 |
| Pten          | NM_008960    | 0.000240873 | 1.43198 |
| Gnpda2        | NM_001038015 | 0.00904814  | 1.43181 |
| Bcr           | NM_001081412 | 0.0239882   | 1.43134 |
| Carhsp1       | NM_025821    | 0.00604132  | 1.43121 |
| D930014E17Rik | NM_020616    | 0.00141359  | 1.43073 |
| Gda           | NM_010266    | 0.0135157   | 1.43053 |
| Atl1          | NM_178628    | 0.00254156  | 1.43034 |
| Gla           | NM_013463    | 0.00319542  | 1.43016 |
| Gemin5        | NM_001166669 | 0.00700406  | 1.42954 |
| Ddx26b        | NM_172779    | 0.0278583   | 1.42952 |
| Lcorl         | NM_001163073 | 0.0137611   | 1.42949 |
| 2810055G20Rik | NR_015543    | 0.0166734   | 1.42947 |
| ---           | ---          | 0.0135577   | 1.42854 |
| Pkp2          | NM_026163    | 0.000622616 | 1.42827 |
| Hsd17b7       | NM_010476    | 0.00065504  | 1.42815 |
| Ang           | NM_001161731 | 0.0306664   | 1.42813 |
| Arap2         | NM_178407    | 0.0257285   | 1.42713 |
| Csnk2a2       | NM_009974    | 0.00599391  | 1.4271  |
| Wbp5          | NM_011712    | 0.0268493   | 1.42679 |
| Lats2         | NM_015771    | 0.0043867   | 1.42662 |
| Stbd1         | NM_175096    | 0.0488578   | 1.4263  |
| Cdc5l         | NM_152810    | 0.00594296  | 1.42568 |
| LOC100048299  | NM_001146176 | 0.00111704  | 1.42471 |
| Timp3         | NM_011595    | 0.0235028   | 1.42453 |
| Ctla2a        | NM_001145799 | 0.0206387   | 1.42404 |

|               |              |             |         |
|---------------|--------------|-------------|---------|
| Xirp1         | NM_001081339 | 0.0292053   | 1.42369 |
| Gm6722        | NM_016750    | 0.00497038  | 1.42364 |
| Slc35a5       | NM_028756    | 0.0387388   | 1.4235  |
| Rras2         | NM_025846    | 0.00138377  | 1.42298 |
| Cd99l2        | NM_138309    | 0.0163779   | 1.42241 |
| Rsl1          | NM_001013769 | 0.0321784   | 1.42227 |
| Cabin1        | NM_172549    | 0.0129276   | 1.42223 |
| Usp7          | NM_001003918 | 0.0111149   | 1.42216 |
| Prkar1a       | NM_021880    | 0.00010953  | 1.4216  |
| 1110032A03Rik | NM_023483    | 0.0261327   | 1.42126 |
| Tra2b         | NM_009186    | 0.0423077   | 1.4211  |
| Scin          | NM_001146196 | 0.0292552   | 1.4208  |
| Magt1         | NM_025952    | 0.0312241   | 1.42078 |
| Pja2          | NM_001025309 | 0.00239583  | 1.42035 |
| Lsm1          | NM_026032    | 0.0146561   | 1.41963 |
| Tmem167       | NM_025335    | 0.0131608   | 1.41955 |
| Ube2v2        | NM_001159351 | 0.0119072   | 1.41938 |
| 3200002M19Rik | NM_027532    | 0.00429183  | 1.41933 |
| Mphosph10     | NM_026483    | 0.000978488 | 1.41897 |
| Gpx8          | NM_027127    | 0.0093741   | 1.41881 |
| ---           | ---          | 0.00176896  | 1.41869 |
| Hfe           | NM_010424    | 0.0274747   | 1.4184  |
| Zfp101        | NM_009542    | 0.00283624  | 1.41743 |
| Csnk1g3       | NM_152809    | 0.00129991  | 1.41736 |
| Tfrc          | NM_011638    | 0.00440234  | 1.4168  |
| Slk           | NM_001164639 | 0.00309362  | 1.41663 |
| Trim23        | NM_030731    | 0.0325895   | 1.41547 |
| Dst           | NM_133833    | 0.00746048  | 1.41546 |
| Dtna          | NM_010087    | 0.0012546   | 1.41472 |
| Vps24         | NM_025783    | 0.0030463   | 1.41445 |
| ---           | ---          | 0.0285717   | 1.41432 |
| Rtn4          | NM_024226    | 0.0266326   | 1.41357 |
| ---           | ---          | 0.0111858   | 1.41338 |
| LOC100048247  | NM_029508    | 0.000831365 | 1.41305 |
| Radil         | NM_178702    | 0.00671226  | 1.41255 |
| Ell2          | NM_138953    | 0.0129587   | 1.41234 |
| 2010106G01Rik | NM_023220    | 0.0126325   | 1.41233 |
| ---           | ---          | 0.0194365   | 1.41198 |
| Psm14         | NM_021526    | 0.00365024  | 1.4116  |
| Btf3l4        | NM_027453    | 0.0139719   | 1.41154 |
| ---           | ---          | 0.0447702   | 1.41136 |
| Tmem30a       | NM_133718    | 0.000126841 | 1.41123 |

|               |              |             |         |
|---------------|--------------|-------------|---------|
| Polr3e        | NM_001164096 | 0.0205075   | 1.41116 |
| Anapc10       | NM_026904    | 0.00678021  | 1.41087 |
| Calcr1        | NM_018782    | 0.00557509  | 1.41068 |
| Bpgm          | NM_007563    | 0.00105866  | 1.41062 |
| Acer3         | NM_025408    | 0.016965    | 1.41062 |
| Psm5          | NM_011967    | 0.00333216  | 1.41057 |
| Fam92a        | NM_026558    | 0.00265314  | 1.41041 |
| Synpo2        | NM_080451    | 0.00234281  | 1.4104  |
| Eif5          | NM_173363    | 0.000430264 | 1.41033 |
| 2700046G09Rik | NR_033198    | 0.0287572   | 1.40993 |
| Pkp2          | NM_026163    | 0.00730029  | 1.40987 |
| Rbm5          | NM_148930    | 0.0187863   | 1.40941 |
| Mrps22        | NM_025485    | 0.0161676   | 1.40933 |
| Rora          | NM_013646    | 0.022861    | 1.40921 |
| Agps          | NM_172666    | 8.56E-05    | 1.40888 |
| Pfn2          | NM_019410    | 0.00636809  | 1.40872 |
| 2410017P09Rik | XR_001632    | 0.00281004  | 1.40856 |
| AU041133      | NM_001163064 | 0.00655223  | 1.40763 |
| Top2b         | NM_009409    | 0.00060049  | 1.40689 |
| Ppp2ca        | NM_019411    | 0.00542898  | 1.4068  |
| Muc15         | NM_172979    | 0.00560403  | 1.40638 |
| Gm5113        | NM_001033540 | 0.000613946 | 1.40596 |
| Ankhd1        | NM_175375    | 0.00866263  | 1.40588 |
| Ankrd10       | NM_001167967 | 0.00506729  | 1.40576 |
| Fam82a2       | NM_001033136 | 0.00202917  | 1.40575 |
| Igf1          | NM_001111274 | 0.0426628   | 1.40572 |
| Maf           | NM_001025577 | 0.0134613   | 1.40568 |
| Usp7          | NM_001003918 | 0.0112627   | 1.40555 |
| Syncrip       | NM_019666    | 0.00311818  | 1.40482 |
| Crebzf        | NM_145151    | 0.0134185   | 1.40409 |
| Rap1b         | NM_024457    | 0.00653685  | 1.40387 |
| LOC100044900  | NM_001177609 | 0.00336083  | 1.4037  |
| Bmpr1a        | NM_009758    | 0.0022795   | 1.40341 |
| Mrpl1         | NM_001039084 | 0.00930571  | 1.40314 |
| Ccdc59        | NM_025602    | 0.00158819  | 1.40254 |
| Atp6ap2       | NM_027439    | 0.0071685   | 1.40194 |
| Lrp8          | NM_001080926 | 0.00674632  | 1.40186 |
| Kpna2         | NM_010655    | 0.00584162  | 1.4018  |
| 1110003E01Rik | NM_133697    | 0.0122488   | 1.40147 |
| Slc4a7        | NM_001033270 | 0.0334158   | 1.40119 |
| Selk          | NM_019979    | 0.0239824   | 1.40107 |
| Ncl           | NM_010880    | 0.00910081  | 1.40103 |



|               |              |             |         |
|---------------|--------------|-------------|---------|
| Aqr           | NM_009702    | 0.0139886   | 1.40099 |
| Wls           | NM_026582    | 0.00724215  | 1.40076 |
| Zfyve16       | NM_173392    | 0.0092661   | 1.4005  |
| Ssb           | NM_001110145 | 0.00618306  | 1.40036 |
| Gm11847       | NM_053263    | 0.00494657  | 1.39997 |
| LOC100045031  | NM_001168578 | 0.0178507   | 1.39954 |
| LOC100046344  | NM_008704    | 0.00562733  | 1.39944 |
| Dock10        | NM_175291    | 0.0235748   | 1.39898 |
| Creb3         | NM_013497    | 0.0100121   | 1.39876 |
| Tatdn1        | NM_175151    | 0.0211929   | 1.3985  |
| ---           | ---          | 0.00413816  | 1.39823 |
| 2610029G23Rik | NM_026312    | 0.0333155   | 1.3976  |
| Dnajb4        | NM_025926    | 0.0137305   | 1.39745 |
| Tceb1         | NM_026456    | 0.0064554   | 1.39744 |
| Pmp22         | NM_008885    | 0.0268416   | 1.39721 |
| Cst6          | NM_028623    | 0.0309922   | 1.39721 |
| Mobkl1a       | NM_026735    | 0.0174408   | 1.39677 |
| Kif3b         | NM_008444    | 0.00571518  | 1.39671 |
| Sap30         | NM_021788    | 0.0157667   | 1.39668 |
| A630033E08Rik | NM_001110254 | 0.0101516   | 1.39663 |
| C230091D08Rik | NR_015479    | 0.0197455   | 1.39649 |
| Asrgl1        | NM_025610    | 0.00551585  | 1.39625 |
| Vldlr         | NM_001161420 | 0.00847002  | 1.39598 |
| Btnl9         | NM_172793    | 0.0440114   | 1.39569 |
| 1600012F09Rik | NM_025904    | 0.0358438   | 1.39552 |
| Zg16          | NM_026918    | 0.0359978   | 1.39502 |
| Qpct          | NM_027455    | 0.035203    | 1.3948  |
| Fam168a       | NM_178764    | 0.00262662  | 1.39428 |
| ---           | ---          | 0.00597792  | 1.39389 |
| Ccdc97        | NM_028771    | 0.000369412 | 1.39349 |
| Fam82b        | NM_025476    | 0.0157531   | 1.39331 |
| Cacna2d1      | NM_001110843 | 0.0314953   | 1.39313 |
| Mobkl1a       | NM_026735    | 3.46E-05    | 1.39302 |
| Ppp2r5c       | NM_001081457 | 0.00507057  | 1.39299 |
| LOC433064     | NM_001110129 | 0.0481832   | 1.39295 |
| Rbm26         | NM_134077    | 0.00143415  | 1.39283 |
| Ccnb1         | NM_172301    | 0.0398659   | 1.39247 |
| Rpp14         | NM_025938    | 0.00741072  | 1.39234 |
| Dnajb6        | NM_001037940 | 0.0201323   | 1.39208 |
| Exd1          | NM_172857    | 0.000303003 | 1.39179 |
| Rpf2          | NM_001042556 | 0.00222891  | 1.39131 |
| Nrtn          | NM_008738    | 0.0362314   | 1.39099 |

|               |              |             |         |
|---------------|--------------|-------------|---------|
| Rbmx          | NM_001166623 | 0.00528444  | 1.39094 |
| S100a6        | NM_011313    | 0.000320445 | 1.39083 |
| Rrm1          | NM_009103    | 0.0213524   | 1.39071 |
| Cuzd1         | NM_008411    | 0.0199488   | 1.39066 |
| Alkbh5        | NM_172943    | 0.0355485   | 1.39035 |
| Aasdhppt      | NM_026276    | 0.0425113   | 1.39025 |
| Bzw1          | NM_025824    | 0.0042068   | 1.39012 |
| 2310003F16Rik | NM_026318    | 0.00334943  | 1.38993 |
| Ablim1        | NM_001103177 | 0.0105293   | 1.38962 |
| Ikbip         | NM_026166    | 0.00549507  | 1.38957 |
| Nop56         | NM_024193    | 0.0384411   | 1.3895  |
| ---           | ---          | 0.0221796   | 1.38921 |
| Psmc4         | NM_011874    | 0.0224084   | 1.38903 |
| Hes1          | NM_008235    | 0.0297629   | 1.38903 |
| Srp9          | NM_012058    | 0.00438936  | 1.3888  |
| Zfp322a       | NM_001111107 | 0.00486072  | 1.3887  |
| Apool         | NM_026565    | 0.0424069   | 1.3884  |
| Tbce          | NM_178337    | 0.0138939   | 1.38832 |
| 3110057O12Rik | NM_026622    | 0.0125399   | 1.38813 |
| Psma5         | NM_011967    | 0.00288962  | 1.388   |
| Rpl22l1       | NM_026517    | 0.0020746   | 1.38734 |
| Baz1a         | NM_013815    | 0.00986082  | 1.3872  |
| Ngdn          | NM_026890    | 0.00733387  | 1.38711 |
| Atp6v1e1      | NM_007510    | 0.0134221   | 1.38705 |
| Pcmt1         | NM_008786    | 0.00208068  | 1.387   |
| Srp9          | NM_012058    | 0.00228337  | 1.38685 |
| Hba-a1        | NM_001083955 | 0.0324496   | 1.38661 |
| Ccdc141       | NM_001025576 | 0.000751122 | 1.3863  |
| Htatsf1       | NM_028242    | 0.000472906 | 1.38564 |
| Apcdd1        | NM_133237    | 0.0380322   | 1.38498 |
| Mrpl15        | NM_001177658 | 0.00509902  | 1.3848  |
| Per2          | NM_011066    | 0.0193327   | 1.38472 |
| Zfp770        | NM_175466    | 0.000270038 | 1.38466 |
| Kbtbd5        | NM_028202    | 0.0292239   | 1.38465 |
| Ergic2        | NM_026168    | 0.00262611  | 1.38392 |
| Zfp27         | NM_001037707 | 0.0232941   | 1.38388 |
| 2010106G01Rik | NM_023220    | 0.00124987  | 1.38365 |
| Ankhd1        | NM_175375    | 0.0231775   | 1.3827  |
| Mt2           | NM_008630    | 0.0279139   | 1.38267 |
| Rbbp8         | NM_001081223 | 0.0220299   | 1.38257 |
| Slc1a3        | NM_148938    | 0.0032635   | 1.38245 |
| Tspo          | NM_009775    | 0.00532764  | 1.38241 |

|               |              |             |         |
|---------------|--------------|-------------|---------|
| Macf1         | NM_009600    | 0.0216182   | 1.38218 |
| Ddx52         | NM_030096    | 0.0197746   | 1.3819  |
| Cd9           | NM_007657    | 0.0121481   | 1.38128 |
| Spes3         | NM_029701    | 0.000320455 | 1.38127 |
| Socs2         | NM_001168655 | 0.0103746   | 1.3807  |
| Cbx3          | NM_007624    | 0.0251676   | 1.38058 |
| Fam174a       | NM_026321    | 0.0066228   | 1.38055 |
| Rnf11         | NM_013876    | 0.000262222 | 1.38035 |
| Ggps1         | NM_010282    | 0.0240315   | 1.38    |
| Rpain         | NM_027186    | 0.011752    | 1.37997 |
| Lyrn5         | NM_001163628 | 0.000929284 | 1.37993 |
| Zc3h14        | NM_001008506 | 0.00780458  | 1.37992 |
| Nktr          | NM_010918    | 0.0230903   | 1.37981 |
| ---           | ---          | 0.0142242   | 1.3797  |
| Klhdc2        | NM_027117    | 0.0343063   | 1.37892 |
| Wwtr1         | NM_001168281 | 0.000101449 | 1.37851 |
| ---           | ---          | 0.00443031  | 1.3783  |
| Tspo          | NM_009775    | 0.0286536   | 1.37819 |
| Adap2         | NM_172133    | 0.00723467  | 1.3781  |
| Crls1         | NM_001024385 | 0.00725914  | 1.37783 |
| Ccnc          | NM_001122982 | 0.00665498  | 1.37758 |
| Myc           | NM_001177352 | 0.00206373  | 1.37666 |
| Nmd3          | NM_133787    | 0.00658504  | 1.37656 |
| Orc6l         | NM_001163791 | 0.0104      | 1.37634 |
| Dnaja1        | NM_001164671 | 0.0362795   | 1.37609 |
| Ankrd11       | NM_001081379 | 0.0010748   | 1.37521 |
| Gyk           | NM_008194    | 0.0261388   | 1.37475 |
| Dusp27        | NM_001033344 | 0.00245611  | 1.37399 |
| Etohd2        | NR_015349    | 0.00744452  | 1.37383 |
| Ppp2r5e       | NM_012024    | 0.0235345   | 1.37351 |
| Gas5          | NR_002840    | 0.0490372   | 1.3735  |
| Trdn          | NM_029726    | 0.00195075  | 1.3732  |
| Birc5         | NM_001012273 | 0.026696    | 1.37311 |
| Hax1          | NM_011826    | 0.00517611  | 1.37272 |
| Suz12         | NM_001163018 | 0.0076862   | 1.3725  |
| Cenpq         | NM_031863    | 0.0107284   | 1.37227 |
| Atp5o         | NM_138597    | 0.0073378   | 1.37221 |
| Psmc6         | NM_025959    | 0.00444377  | 1.37211 |
| Snhg1         | NR_002896    | 0.0408482   | 1.37174 |
| Vegfa         | NM_001025250 | 0.013632    | 1.3715  |
| Rcor3         | NM_144814    | 0.0160423   | 1.37063 |
| 5430427G11Rik | XM_990419    | 0.00513731  | 1.36999 |

|               |              |            |         |
|---------------|--------------|------------|---------|
| Bag4          | NM_026121    | 0.0243764  | 1.36994 |
| Psmc6         | NM_025959    | 0.00352473 | 1.36985 |
| 2700060E02Rik | NM_026528    | 0.00827989 | 1.36977 |
| Uck2          | NM_030724    | 0.0237072  | 1.36954 |
| Figf          | NM_010216    | 0.00272678 | 1.36931 |
| Sec63         | NM_153055    | 0.0384318  | 1.36853 |
| Arl5b         | NM_029466    | 0.0285411  | 1.36835 |
| Scn3b         | NM_001083917 | 0.00436449 | 1.36832 |
| Rabgap11      | NM_001038621 | 0.0130043  | 1.36722 |
| Gnpda2        | NM_001038015 | 0.0435054  | 1.3671  |
| Wdfy1         | NM_001111279 | 0.0019834  | 1.36666 |
| Cux2          | NM_007804    | 7.45E-06   | 1.36624 |
| 4732415M23Rik | NM_177279    | 0.0445321  | 1.36605 |
| Hmgn3         | NM_026122    | 0.0375159  | 1.36583 |
| Dsg2          | NM_007883    | 0.0236273  | 1.36578 |
| Peli2         | NM_033602    | 0.00563791 | 1.36569 |
| ---           | ---          | 0.0129667  | 1.36558 |
| Nras          | NM_010937    | 0.0163142  | 1.36511 |
| Slpr1         | NM_007901    | 0.0135992  | 1.36507 |
| Gm10145       | NM_009456    | 0.0102307  | 1.36504 |
| Ogfr11        | NM_001081079 | 8.79E-05   | 1.36502 |
| Wdr61         | NM_001025375 | 0.0196725  | 1.36495 |
| Fnip1         | NM_173753    | 0.0224101  | 1.36486 |
| Serf2         | NM_011354    | 0.00235227 | 1.36482 |
| Rev3l         | NM_011264    | 0.00833822 | 1.36455 |
| Srr           | NM_001163311 | 0.018724   | 1.3645  |
| Olfml2b       | NM_177068    | 0.00656465 | 1.36445 |
| A1225934      | ---          | 0.0199596  | 1.3641  |
| Prelid2       | NM_029942    | 0.0166329  | 1.36403 |
| 0610010O12Rik | NM_001081365 | 0.00184076 | 1.36378 |
| Nus1          | NM_030250    | 0.0104035  | 1.36359 |
| Sdpr          | NM_138741    | 0.0409178  | 1.36352 |
| Zfp53         | NM_013843    | 0.0195318  | 1.36326 |
| Heca          | NM_001033432 | 0.0126635  | 1.3629  |
| Gm11847       | NM_053263    | 0.00192358 | 1.36283 |
| Psmc7         | NM_010817    | 0.00519116 | 1.36277 |
| Tuba1b        | NM_011654    | 0.0162097  | 1.36225 |
| Sfrs3         | NM_013663    | 0.0386919  | 1.36216 |
| Lrrc40        | NM_024194    | 0.0475446  | 1.36191 |
| LOC100047864  | NM_026998    | 0.0487268  | 1.36151 |
| Fkbp7         | NM_010222    | 0.0242726  | 1.36106 |
| C730026J16    | ---          | 0.00661166 | 1.36058 |

|               |              |             |         |
|---------------|--------------|-------------|---------|
| Hnrp1l        | NM_144802    | 0.00135196  | 1.36037 |
| Utp23         | NM_030132    | 0.00989753  | 1.36031 |
| Llph          | NM_025431    | 0.00284516  | 1.36019 |
| Cenc          | NM_001122982 | 0.00957053  | 1.36017 |
| Zfp52         | NM_144515    | 0.0116079   | 1.36005 |
| 1110014N23Rik | NM_001081041 | 0.038996    | 1.35948 |
| Tbc1d15       | NM_025706    | 0.0199157   | 1.35944 |
| Lztf1l        | NM_033322    | 0.0204397   | 1.35919 |
| Pfdn4         | NM_001013369 | 0.032977    | 1.35907 |
| Thyn1         | NM_144543    | 0.0360899   | 1.35874 |
| Rbm34         | NM_172762    | 0.0373062   | 1.3587  |
| Acp1          | NM_001110239 | 0.031813    | 1.35863 |
| Ptp4a2        | NM_001164745 | 0.000354896 | 1.35847 |
| Zfp617        | NM_133358    | 0.00693838  | 1.35811 |
| Bend5         | NM_026279    | 0.0283168   | 1.35798 |
| Brcc3         | NM_001166457 | 0.0163862   | 1.3579  |
| 3200002M19Rik | NM_027532    | 0.0270418   | 1.35776 |
| Ndufa7        | NM_023202    | 0.00775721  | 1.35739 |
| 4632415L05Rik | NR_027985    | 0.0072029   | 1.35733 |
| Ints12        | NM_027927    | 0.039018    | 1.35698 |
| Mpp5          | NM_019579    | 0.0104326   | 1.35649 |
| Utp15         | NM_178918    | 0.0192328   | 1.35648 |
| Cbx4          | NM_007625    | 0.0199969   | 1.35614 |
| Yy1           | NM_009537    | 0.0161124   | 1.35606 |
| Usp34         | XM_483996    | 0.0422172   | 1.35599 |
| Tor1aip2      | NM_001160180 | 0.00187765  | 1.35592 |
| Rp2h          | NM_133669    | 0.0296661   | 1.35574 |
| AU019823      | NM_001134902 | 0.0198221   | 1.35559 |
| Fam129a       | NM_022018    | 0.025855    | 1.35522 |
| Morc3         | NM_001045529 | 0.034003    | 1.35521 |
| Slc25a32      | NM_172402    | 0.0115594   | 1.35504 |
| Rpf2          | NM_001042556 | 0.0146509   | 1.35482 |
| 6820431F20Rik | NR_030708    | 0.021492    | 1.3548  |
| Pdlim5        | NM_019808    | 4.61E-05    | 1.35461 |
| Papola        | NM_011112    | 0.00533626  | 1.35456 |
| Nhp2          | NM_026631    | 0.0284303   | 1.35455 |
| Acot9         | NM_019736    | 0.0105042   | 1.35434 |
| Eid1          | NM_025613    | 0.0151231   | 1.35427 |
| Gm4455        | NM_001142957 | 0.00579159  | 1.35416 |
| Bbs5          | NM_028284    | 0.0159956   | 1.35412 |
| Msi2          | NM_054043    | 0.0076375   | 1.3541  |
| Ero1l         | NM_015774    | 0.034728    | 1.35372 |

|               |              |             |         |
|---------------|--------------|-------------|---------|
| Csde1         | NM_001161854 | 1.90E-05    | 1.35352 |
| Dusp11        | NM_028099    | 0.0453777   | 1.35347 |
| Trub2         | NM_145520    | 0.0368563   | 1.35312 |
| Prpf39        | NM_177806    | 0.0134742   | 1.35293 |
| Anxa4         | NM_013471    | 0.0171176   | 1.35275 |
| Pir           | NM_027153    | 0.0154545   | 1.35233 |
| Gria3         | NM_016886    | 0.0121091   | 1.35214 |
| Trub2         | NM_145520    | 0.0279725   | 1.35191 |
| Brwd1         | NM_001103179 | 0.0030722   | 1.35162 |
| Cmc1          | NM_026442    | 0.0439251   | 1.35146 |
| Cd99l2        | NM_138309    | 0.0153611   | 1.35132 |
| Vti1a         | NM_016862    | 0.00844417  | 1.3512  |
| Nudcd2        | NM_026023    | 0.00159372  | 1.35115 |
| Rarres2       | NM_027852    | 0.0172533   | 1.35108 |
| Trim44        | NM_020267    | 0.00523714  | 1.35087 |
| Isoc1         | NM_025478    | 0.023352    | 1.35082 |
| Lima1         | NM_001113545 | 0.00286844  | 1.35081 |
| Ctr9          | NM_009431    | 0.0485123   | 1.35056 |
| Cebpz         | NM_001024806 | 0.0190177   | 1.35043 |
| Mrpl20        | NM_025570    | 0.00226321  | 1.35021 |
| Stk4          | NM_021420    | 0.0063356   | 1.35003 |
| Gca           | NM_145523    | 0.00146551  | 1.34994 |
| Csnk2a1       | NM_007788    | 0.0019501   | 1.34986 |
| Msr1          | NM_001113326 | 0.0494281   | 1.34949 |
| Gda           | NM_010266    | 0.00470787  | 1.3494  |
| Egln3         | NM_028133    | 0.0257222   | 1.34911 |
| ---           | ---          | 0.0145867   | 1.3491  |
| Gnpnat1       | NM_019425    | 0.0353444   | 1.3487  |
| Deaf17        | NM_001165980 | 0.00568244  | 1.34869 |
| Rrm2          | NM_009104    | 0.0108722   | 1.34858 |
| 1810048J11Rik | NM_026327    | 0.00375764  | 1.34843 |
| Btaf1         | NM_001080706 | 0.048571    | 1.34824 |
| Hspa4         | NM_008300    | 0.0017833   | 1.3482  |
| Ptplb         | NM_023587    | 0.0202234   | 1.34818 |
| Phf3          | NM_001081080 | 0.0191503   | 1.3481  |
| Wbp11         | NM_021714    | 0.0383141   | 1.348   |
| Chchd3        | NM_025336    | 0.0030604   | 1.34772 |
| Podxl         | NM_013723    | 0.0326298   | 1.34745 |
| Ankrd12       | NM_001025572 | 0.00721445  | 1.34735 |
| 4930579G22Rik | NM_026916    | 0.0015084   | 1.34727 |
| Gm14288       | NM_001033123 | 0.000334419 | 1.34723 |
| Shcbp1        | NM_011369    | 0.00876673  | 1.34683 |

|               |              |             |         |
|---------------|--------------|-------------|---------|
| Ubl3          | NM_011908    | 0.000411994 | 1.34658 |
| Pcna          | NM_011045    | 0.0248456   | 1.34651 |
| Homer1        | NM_011982    | 0.0105882   | 1.34644 |
| Rbm4          | NM_009032    | 0.0285407   | 1.34637 |
| Rhobtb3       | NM_028493    | 0.022481    | 1.34632 |
| Creb3         | NM_013497    | 0.00794181  | 1.3456  |
| Ogfr11        | NM_001081079 | 0.000427543 | 1.34555 |
| Nfatc3        | NM_010901    | 0.015872    | 1.3454  |
| Acyp2         | NM_029344    | 0.00354521  | 1.34477 |
| Rbm25         | NM_025930    | 0.0078786   | 1.34455 |
| Ripk1         | NM_009068    | 0.0425997   | 1.34434 |
| Orc4l         | NM_001177313 | 0.00611888  | 1.34419 |
| Mtss1         | NM_001146180 | 0.0361897   | 1.34417 |
| Mkrl1         | NM_018810    | 0.0280737   | 1.34404 |
| I7Rn6         | NM_026304    | 0.0381678   | 1.34356 |
| Mobkl1b       | NM_145571    | 0.0132844   | 1.34353 |
| Gulp1         | NM_027506    | 0.0103654   | 1.34349 |
| Sacs          | NM_172809    | 0.0309317   | 1.34332 |
| Tmem42        | NM_001164823 | 0.0255299   | 1.34322 |
| Camta1        | NM_001081557 | 0.0223113   | 1.34318 |
| Gm6563        | NM_025364    | 0.00601907  | 1.34303 |
| Rad17         | NM_001044371 | 0.00417043  | 1.34299 |
| 4930402E16Rik | NM_198308    | 0.0188107   | 1.34256 |
| Luc7l3        | NM_026313    | 0.00194837  | 1.34245 |
| Mum1l1        | NM_001164630 | 0.0144016   | 1.34219 |
| Spata24       | NM_027733    | 0.00300922  | 1.34211 |
| Nap1l1        | NM_001146707 | 0.00247787  | 1.34157 |
| Cp            | NM_001042611 | 0.0490558   | 1.34146 |
| Tra2b         | NM_009186    | 0.0122644   | 1.34139 |
| Gm13835       | NM_011184    | 0.00204109  | 1.34125 |
| Cops3         | NM_011991    | 0.00547652  | 1.34117 |
| Pdcd10        | NM_019745    | 0.00384418  | 1.34099 |
| Napg          | NM_028017    | 0.0014443   | 1.34095 |
| Pgap3         | NM_001033537 | 0.0140784   | 1.34087 |
| Ccni          | NM_017367    | 0.0169567   | 1.33984 |
| Ppp2r5e       | NM_012024    | 0.0292871   | 1.33973 |
| Ttc32         | NM_029321    | 0.0396039   | 1.33969 |
| Adipor2       | NM_197985    | 0.00425248  | 1.33919 |
| Anapc4        | NM_024213    | 0.0466869   | 1.3386  |
| Csnk2a1       | NM_007788    | 0.00441682  | 1.33784 |
| Srp19         | NM_025527    | 0.00222609  | 1.33783 |
| Gstt2         | NM_010361    | 0.0176875   | 1.33778 |

|               |              |             |         |
|---------------|--------------|-------------|---------|
| D8ErtD738e    | NM_001007571 | 0.000561062 | 1.33682 |
| Vamp7         | NM_011515    | 0.00879777  | 1.33667 |
| Zfp110        | NM_022981    | 0.0261774   | 1.33608 |
| Zfp622        | NM_144523    | 0.0226001   | 1.33607 |
| Eef1e1        | NM_025380    | 0.0041713   | 1.33595 |
| 1810026B05Rik | XM_897347    | 0.00621886  | 1.33579 |
| Polr2g        | NM_026329    | 0.0177767   | 1.33571 |
| C330006D17Rik | ---          | 0.00169735  | 1.33569 |
| Actr2         | NM_146243    | 0.00175888  | 1.33531 |
| Purb          | NM_011221    | 0.0220986   | 1.33514 |
| Mad2l1bp      | NM_025649    | 0.0393386   | 1.33511 |
| 1810037I17Rik | NM_024461    | 0.00903072  | 1.33503 |
| Fastkd1       | NM_177244    | 0.0191056   | 1.33468 |
| Fndc3a        | NM_207636    | 0.0449039   | 1.33463 |
| E030010A14Rik | NM_183160    | 0.023784    | 1.33456 |
| Galnt7        | NM_001167981 | 0.0453335   | 1.33446 |
| Tubb2a        | NM_009450    | 0.0420173   | 1.33443 |
| ---           | ---          | 0.00822422  | 1.33426 |
| Ubn1          | NM_026666    | 0.0184491   | 1.33395 |
| Tmem69        | NM_177670    | 0.0136872   | 1.33387 |
| Mett5d1       | NM_029790    | 0.00951453  | 1.33378 |
| Dact1         | NM_021532    | 0.0449853   | 1.33357 |
| Rps12         | NM_011295    | 0.0169431   | 1.33353 |
| ---           | ---          | 0.0439638   | 1.33326 |
| Med7          | NM_001104530 | 0.00289056  | 1.33314 |
| Nucb2         | NM_001130479 | 0.014423    | 1.33291 |
| Ecsr          | NM_001033141 | 0.0348884   | 1.33266 |
| Gm11518       | NM_011289    | 0.0254272   | 1.33248 |
| Gcap14        | NM_027045    | 0.0314748   | 1.33243 |
| Twistnb       | NM_172253    | 0.0141944   | 1.33224 |
| Pnlip         | NM_026925    | 0.0143468   | 1.33224 |
| Gpr146        | NM_001038703 | 0.0178551   | 1.33189 |
| Mttp          | NM_001163457 | 0.0274375   | 1.33131 |
| Serinc1       | NM_019760    | 0.00615963  | 1.33096 |
| Ncam1         | NM_001081445 | 0.0173914   | 1.33096 |
| 2810408B13Rik | XM_001004816 | 0.0010396   | 1.33048 |
| Exosc1        | NM_001164561 | 0.0168608   | 1.33028 |
| Uba2          | NM_016682    | 0.00206856  | 1.33027 |
| Baz2a         | NM_054078    | 0.0157884   | 1.32989 |
| Fbxo9         | NM_001081490 | 0.00552772  | 1.32978 |
| Nnt           | NM_008710    | 0.00241208  | 1.3292  |
| Rif1          | NM_175238    | 0.0100995   | 1.32902 |



|               |              |             |         |
|---------------|--------------|-------------|---------|
| Cacna2d1      | NM_001110843 | 0.0488854   | 1.3286  |
| Gja3          | NM_016975    | 0.00805261  | 1.32855 |
| Fdx1          | NM_007996    | 0.0153304   | 1.32854 |
| LOC100047915  | NM_133771    | 0.00590388  | 1.32846 |
| Tor2a         | NM_152800    | 0.0091026   | 1.32828 |
| 5730455P16Rik | NM_027472    | 0.0100823   | 1.32817 |
| Gabarapl2     | NM_026693    | 0.007993    | 1.32814 |
| Cyp21a1       | NM_009995    | 0.000905934 | 1.32784 |
| Sgms1         | NM_001168525 | 0.0370215   | 1.32777 |
| Vbp1          | NM_011692    | 0.0102094   | 1.32768 |
| Scfd1         | NM_029825    | 0.0211361   | 1.32749 |
| Tbcc          | NM_178385    | 0.0148751   | 1.32705 |
| Dync1li1      | NM_146229    | 0.0127465   | 1.32676 |
| 1110059G10Rik | NM_025419    | 0.0163907   | 1.32642 |
| Ssu72         | NM_026899    | 0.0150807   | 1.32628 |
| 1110003E01Rik | NM_133697    | 0.0202176   | 1.32627 |
| Arhgap29      | NM_172525    | 0.0102229   | 1.32624 |
| Bud31         | NM_001008705 | 0.0175193   | 1.32602 |
| Tra2b         | NM_009186    | 0.0362684   | 1.32602 |
| Cetn2         | NM_019405    | 0.012083    | 1.32595 |
| Orc4l         | NM_001177313 | 0.008282    | 1.32534 |
| Epb4.1l2      | NM_013511    | 0.0196751   | 1.32523 |
| Cpsf6         | NM_001013391 | 0.0242515   | 1.3251  |
| Crbn          | NM_021449    | 0.0294249   | 1.32499 |
| Bola2         | NM_175103    | 0.00390958  | 1.32477 |
| Tmem71        | NM_172514    | 0.00582272  | 1.32467 |
| Nerna00081    | NR_027828    | 0.0108607   | 1.32416 |
| Atp6v0e       | NM_025272    | 0.0159239   | 1.32412 |
| Ipo8          | NM_001081113 | 0.0232468   | 1.32412 |
| Eid1          | NM_025613    | 0.0180024   | 1.32377 |
| Mynn          | NM_030557    | 0.0320742   | 1.32377 |
| Pole3         | NM_021498    | 0.0146914   | 1.32359 |
| Zbtb8os       | NM_025970    | 0.0301768   | 1.32344 |
| Golph3        | NM_025673    | 0.0075654   | 1.32342 |
| 1500011H22Rik | NM_026883    | 0.0180819   | 1.32334 |
| Sh3gl2        | NM_019535    | 0.0466449   | 1.32332 |
| Unc50         | NM_026123    | 0.0342959   | 1.32327 |
| LOC100045866  | NM_026456    | 0.00937243  | 1.32321 |
| Prrx2         | NM_009116    | 0.0115535   | 1.32304 |
| Dok7          | NM_172708    | 0.0213713   | 1.32299 |
| Tomm20        | NM_024214    | 0.00356289  | 1.3229  |
| Mki67ip       | NM_026472    | 0.0175833   | 1.32261 |

|               |              |            |         |
|---------------|--------------|------------|---------|
| ---           | ---          | 0.0200295  | 1.32216 |
| Mrpl35        | NM_025430    | 0.0191335  | 1.322   |
| Dynll1        | NM_001177391 | 0.0281606  | 1.32187 |
| Nr2f2         | NM_009697    | 0.00827751 | 1.32177 |
| 2-Sep         | NM_001159717 | 0.00268424 | 1.32144 |
| Gnl2          | NM_145552    | 0.0122425  | 1.32103 |
| Il13ra1       | NM_133990    | 0.0277672  | 1.32078 |
| Taf9          | NM_001015889 | 0.0111645  | 1.32044 |
| Aasdhppt      | NM_026276    | 0.0147905  | 1.32036 |
| Rfc2          | NM_020022    | 0.00869007 | 1.32023 |
| Eif2s1        | NM_026114    | 0.0218543  | 1.31906 |
| Utp23         | NM_030132    | 0.0146642  | 1.31904 |
| Acvr2a        | NM_007396    | 0.00298118 | 1.31872 |
| Arl6ip1       | NM_019419    | 0.0330886  | 1.31826 |
| Nkiras1       | NM_023526    | 0.00892054 | 1.31771 |
| Mrpl32        | NM_029271    | 0.0178602  | 1.3171  |
| Pdpk1         | NM_001080773 | 0.00257423 | 1.317   |
| Ccdc50        | NM_001025615 | 0.00738495 | 1.31672 |
| Set           | NM_023871    | 0.00768176 | 1.31602 |
| Npm1          | NM_008722    | 0.0188634  | 1.31589 |
| Zfp106        | NM_011743    | 0.0200896  | 1.31569 |
| Npm1          | NM_008722    | 0.00781316 | 1.31539 |
| Ube2b         | NM_009458    | 0.0226686  | 1.31509 |
| 0610009D07Rik | NM_025323    | 0.00857732 | 1.31474 |
| Rapgef6       | NM_175258    | 0.00479384 | 1.31473 |
| Rpl37         | NM_026069    | 0.0072088  | 1.31417 |
| Appbp2        | NM_025825    | 0.00523914 | 1.31411 |
| Zscan21       | NM_001044703 | 0.0203205  | 1.31381 |
| Tmem49        | NM_029478    | 0.00717041 | 1.31378 |
| Mib1          | NM_144860    | 0.0256884  | 1.31376 |
| Meg3          | NR_003633    | 0.0137498  | 1.3135  |
| Gm3258        | NM_009296    | 0.027512   | 1.31348 |
| Dnajc5        | NM_016775    | 0.0183936  | 1.31346 |
| Clic5         | NM_172621    | 0.0440461  | 1.3134  |
| Ogfrl1        | NM_001081079 | 0.00166127 | 1.31335 |
| Cd59a         | NM_001111060 | 0.00665695 | 1.31289 |
| Znhit3        | NM_001005223 | 0.0299712  | 1.31283 |
| AV249152      | NM_145425    | 0.00379568 | 1.31272 |
| Nap111        | NM_001146707 | 0.00293102 | 1.31235 |
| Mrap          | NM_029844    | 0.00525823 | 1.31228 |
| Bicd1         | NM_001112796 | 0.0393844  | 1.31204 |
| 2810001A02Rik | ---          | 0.00942842 | 1.31143 |

|               |              |            |         |
|---------------|--------------|------------|---------|
| C330007P06Rik | NM_029951    | 0.043537   | 1.31132 |
| Dnaja2        | NM_019794    | 0.00653833 | 1.31106 |
| Cast          | NM_009817    | 0.00800344 | 1.31079 |
| Rarres2       | NM_027852    | 0.0236771  | 1.3106  |
| Ugdh          | NM_009466    | 4.48E-06   | 1.31038 |
| Csgalnact2    | NM_030165    | 0.0164527  | 1.31028 |
| Pdcd2         | NM_008799    | 0.0190256  | 1.31025 |
| Chd1          | NM_007690    | 0.0334142  | 1.31015 |
| Snap23        | NM_001177792 | 0.00639835 | 1.31006 |
| Ier5          | NM_010500    | 0.0153995  | 1.31003 |
| Mcl1          | NM_008562    | 0.0125289  | 1.30974 |
| Srp14         | NM_009273    | 0.0145679  | 1.30973 |
| Baiap211      | NM_025833    | 0.00980834 | 1.30971 |
| Ndufc2        | NM_024220    | 0.0144006  | 1.30968 |
| Lats2         | NM_015771    | 0.0443336  | 1.30957 |
| Sod1          | NM_011434    | 0.00785474 | 1.30949 |
| Rpl3          | NM_013762    | 0.0150769  | 1.30942 |
| Pik3ca        | NM_008839    | 0.00501872 | 1.3092  |
| Asph          | NM_001177849 | 0.00317768 | 1.30902 |
| Clk4          | NM_007714    | 0.0319338  | 1.3088  |
| Smpx          | NM_025357    | 2.22E-05   | 1.30861 |
| Sssca1        | NM_020491    | 0.0267646  | 1.30834 |
| Trim37        | NM_197987    | 0.0137929  | 1.30815 |
| Hook3         | NM_207659    | 0.0313924  | 1.30811 |
| Snx7          | NM_029655    | 0.0414935  | 1.30792 |
| Pcnp          | NM_001024622 | 0.00182895 | 1.30787 |
| Zc3h13        | NM_026083    | 0.0374915  | 1.30775 |
| Anxa7         | NM_001110794 | 0.0211024  | 1.30759 |
| H2afj         | NM_177688    | 0.0213447  | 1.30759 |
| Arid4a        | NM_001081195 | 0.0352612  | 1.30745 |
| Timp3         | NM_011595    | 0.0284301  | 1.30669 |
| Xrcc5         | NM_009533    | 0.0249844  | 1.30655 |
| Ntan1         | NM_010946    | 0.00617275 | 1.30648 |
| Dek           | NM_025900    | 0.00493762 | 1.30647 |
| Dpy19l4       | NM_001081201 | 0.0121441  | 1.30636 |
| Speg          | NM_001085370 | 0.0464277  | 1.30618 |
| Txndc9        | NM_172054    | 0.0445321  | 1.30616 |
| Cdk8          | NM_153599    | 0.00349323 | 1.30615 |
| 2810453I06Rik | NM_026050    | 0.00708863 | 1.30532 |
| Hcfc2         | NM_001081218 | 0.0158923  | 1.30504 |
| Cep110        | NM_012018    | 0.0264561  | 1.30504 |
| Sap30bp       | NM_020483    | 0.0280239  | 1.30483 |

|               |              |             |         |
|---------------|--------------|-------------|---------|
| Mafb          | NM_010658    | 0.043727    | 1.3048  |
| Phka1         | NM_008832    | 0.0472118   | 1.30372 |
| Prkar1a       | NM_021880    | 0.0135116   | 1.30361 |
| Rnf13         | NM_001113413 | 0.0133479   | 1.30358 |
| Plscr3        | NM_001168497 | 0.00178374  | 1.30331 |
| Yme1l1        | NM_013771    | 0.01982     | 1.30327 |
| 3200002M19Rik | NM_027532    | 0.0153618   | 1.30292 |
| Scrn3         | NM_029022    | 0.0174268   | 1.3028  |
| Ttc14         | NM_025978    | 0.0342439   | 1.30275 |
| Dcaf13        | NM_198606    | 0.0274633   | 1.30257 |
| Cnbp          | NM_001109745 | 0.0381446   | 1.30216 |
| Camta1        | NM_001081557 | 0.0441052   | 1.30212 |
| Atf2          | NM_001025093 | 0.010962    | 1.30185 |
| Ythdf2        | NM_145393    | 0.0292071   | 1.30172 |
| Kcnb1         | NM_008420    | 0.00793096  | 1.30171 |
| Arih1         | NM_019927    | 0.00172246  | 1.3017  |
| Eif3e         | NM_008388    | 0.0112824   | 1.30169 |
| Snrpb2        | NM_021335    | 0.0331383   | 1.30146 |
| BC049807      | NM_001002008 | 0.0144587   | 1.3012  |
| 3830403N18Rik | NM_011725    | 0.00243995  | 1.30116 |
| Crot          | NM_023733    | 0.0307137   | 1.30103 |
| Nmd3          | NM_133787    | 0.0190406   | 1.30095 |
| Rps6          | NM_009096    | 0.000530525 | 1.30089 |
| Vps39         | NM_147153    | 0.0176153   | 1.30049 |
| Sdf4          | NM_011341    | 0.0410377   | 1.29996 |
| Tas1r3        | NM_031872    | 0.0208523   | 1.29988 |
| 9430038I01Rik | NM_029886    | 0.00500931  | 1.29945 |
| Glrx3         | NM_023140    | 0.0374191   | 1.29942 |
| Cox4nb        | NM_010926    | 5.70E-05    | 1.29938 |
| Mcts1         | NM_026902    | 0.0328016   | 1.29935 |
| Crip1         | NM_007763    | 0.00306656  | 1.29894 |
| Vrk1          | NM_001029843 | 0.00304669  | 1.29888 |
| Yaf2          | NM_024189    | 0.0143616   | 1.29816 |
| Rap1b         | NM_024457    | 0.0111635   | 1.29807 |
| Bdnf          | NM_001048139 | 0.0435866   | 1.29781 |
| Bclaf1        | NM_001025392 | 0.037636    | 1.2976  |
| 6720454L07Rik | ---          | 0.0480033   | 1.29743 |
| Nol7          | NM_023554    | 0.00168144  | 1.29734 |
| Lgals1        | NM_008495    | 0.00514286  | 1.29731 |
| Popdc3        | NM_024286    | 0.00222577  | 1.29709 |
| Herpud2       | NM_020586    | 0.000662025 | 1.297   |
| Asap1         | NM_010026    | 0.00528034  | 1.29687 |

|               |              |             |         |
|---------------|--------------|-------------|---------|
| Tcof1         | NM_011552    | 0.0149439   | 1.29679 |
| Krr1          | NM_178610    | 0.0273156   | 1.29672 |
| ---           | ---          | 0.00217888  | 1.29621 |
| Lnx1          | NM_001159577 | 0.0336881   | 1.29588 |
| Sacm11        | NM_030692    | 0.0286161   | 1.29578 |
| Hbxip         | NM_026774    | 0.0403758   | 1.29574 |
| Lix1          | NM_025681    | 0.015276    | 1.29569 |
| Smc4          | NM_133786    | 0.043275    | 1.29523 |
| Bmpr1a        | NM_009758    | 0.0222311   | 1.29517 |
| Map2k1        | NM_008927    | 0.00044204  | 1.29504 |
| Agfg1         | NM_010472    | 0.0111922   | 1.29494 |
| Brpf3         | NM_001081315 | 0.00331479  | 1.29494 |
| Usp2          | NM_016808    | 0.0213145   | 1.29475 |
| Gm10075       | NM_001111282 | 0.00764739  | 1.29465 |
| Slc11a2       | NM_001146161 | 0.0376984   | 1.29422 |
| Lsm3          | NM_026309    | 0.0174479   | 1.29421 |
| Rnf103        | NM_009543    | 0.000633664 | 1.29384 |
| Ppp1r3c       | NM_016854    | 0.0466821   | 1.2935  |
| Copg          | NM_017477    | 0.00997764  | 1.29336 |
| Msi2          | NM_054043    | 0.0259257   | 1.29332 |
| Eif3m         | NM_145380    | 0.0247421   | 1.29325 |
| Hrasls        | NM_013751    | 0.0432364   | 1.29297 |
| Kbtbd3        | NM_001164574 | 0.0220004   | 1.29285 |
| Ppp2r3a       | NM_001161362 | 0.0240895   | 1.29268 |
| Tmx1          | NM_028339    | 0.0313755   | 1.29264 |
| 9430038I01Rik | NM_029886    | 0.0193421   | 1.29263 |
| Eapp          | NM_025456    | 0.0163459   | 1.29253 |
| Jkamp         | NM_024205    | 0.011049    | 1.29221 |
| Ube2k         | NM_016786    | 0.00731572  | 1.29211 |
| Sertad1       | NM_018820    | 0.0105572   | 1.29205 |
| Dennd5b       | NM_177192    | 0.0409769   | 1.29197 |
| Cdk7          | NM_009874    | 0.0325116   | 1.29159 |
| Sox17         | NM_011441    | 0.0236026   | 1.29159 |
| 3830406C13Rik | NM_146051    | 0.0279086   | 1.29141 |
| LOC675405     | NM_177393    | 0.016308    | 1.29139 |
| Prpf31        | NM_001159714 | 0.00667411  | 1.29128 |
| Rtcd1         | NM_025517    | 0.0134085   | 1.29113 |
| Mrps14        | NM_025474    | 0.0250368   | 1.29093 |
| Exosc9        | NM_019393    | 0.0382855   | 1.29088 |
| Polb          | NM_011130    | 0.0328443   | 1.29085 |
| Gipc2         | NM_016867    | 0.0444056   | 1.29085 |
| Cwf19I2       | NM_027545    | 0.0311516   | 1.29069 |

|               |              |             |         |
|---------------|--------------|-------------|---------|
| Bzw1          | NM_025824    | 0.0150254   | 1.29062 |
| Gm14057       | NM_133485    | 0.0476951   | 1.2903  |
| Pik3cd        | NM_001029837 | 0.00889289  | 1.29014 |
| Rpp30         | NM_019428    | 0.0282044   | 1.29014 |
| Aktip         | NM_010241    | 0.0341541   | 1.29011 |
| Slc1a5        | NM_009201    | 0.00457371  | 1.2901  |
| Bud31         | NM_001008705 | 0.0131402   | 1.2895  |
| Bet1l         | NM_018742    | 0.0359339   | 1.28941 |
| 3110040N11Rik | NM_026077    | 0.0413558   | 1.28887 |
| Psmc3ip       | NM_008949    | 0.0425081   | 1.28873 |
| Snhg1         | NR_002896    | 0.0209039   | 1.28871 |
| Ikbkap        | NM_026079    | 0.0467605   | 1.28865 |
| Nudcd2        | NM_026023    | 0.00265694  | 1.28843 |
| Atp6v1b2      | NM_007509    | 0.0255967   | 1.28833 |
| Pgam1         | NM_023418    | 0.00660343  | 1.28815 |
| Ndrp4         | NM_145602    | 0.01571     | 1.28805 |
| Snrpb2        | NM_021335    | 0.0350418   | 1.28797 |
| Ndufaf2       | NM_001127346 | 0.0333726   | 1.28782 |
| 15-Sep        | NM_053102    | 0.0155401   | 1.28749 |
| Med30         | NM_027212    | 0.0121114   | 1.28743 |
| Baz2b         | NM_001001182 | 0.0305934   | 1.28728 |
| Ube2k         | NM_016786    | 0.0261615   | 1.28723 |
| Fxr1          | NM_001113188 | 0.00285773  | 1.28706 |
| Mphosph8      | NM_023773    | 0.029565    | 1.28691 |
| 1110067D22Rik | NM_173752    | 0.00158681  | 1.28668 |
| Eif5          | NM_173363    | 0.0409238   | 1.28652 |
| 4833439L19Rik | NM_133797    | 0.0251008   | 1.28651 |
| Klcl          | NM_001025360 | 0.0232065   | 1.28647 |
| Syne1         | NM_001079686 | 0.0359145   | 1.28645 |
| Ubf1          | NM_138589    | 0.0129104   | 1.28618 |
| ---           | ---          | 0.0243565   | 1.28612 |
| Csrp2         | NM_007792    | 0.0442969   | 1.28597 |
| Manea         | NM_172865    | 0.00783862  | 1.28594 |
| Mtap7d2       | NM_001081124 | 0.0470383   | 1.2859  |
| Dnajc24       | NM_026992    | 0.0136061   | 1.28557 |
| Smc1a         | NM_019710    | 0.0422358   | 1.28542 |
| Pdgfc         | NM_019971    | 0.0121757   | 1.28533 |
| Ptpn2         | NM_001127177 | 0.000689744 | 1.28504 |
| 1810009A15Rik | NM_025463    | 0.0309299   | 1.28448 |
| Lats2         | NM_015771    | 0.0244086   | 1.28412 |
| Dkc1          | NM_001030307 | 0.0163388   | 1.2841  |
| Pfkfb3        | NM_001177752 | 0.0269687   | 1.28409 |

|               |              |             |         |
|---------------|--------------|-------------|---------|
| Agfg1         | NM_010472    | 0.00881347  | 1.28402 |
| Zfp606        | NM_001039951 | 0.0257433   | 1.28383 |
| Fastkd2       | NM_172422    | 0.0395107   | 1.28381 |
| Saps2         | NM_026813    | 0.00651674  | 1.28375 |
| Tmpo          | NM_001080129 | 0.0106146   | 1.2837  |
| Atp6v1a       | NM_007508    | 0.017631    | 1.28352 |
| Srp14         | NM_009273    | 0.0360657   | 1.28342 |
| Akirin1       | NM_023423    | 0.000368903 | 1.28332 |
| Pcdh9         | NM_001081377 | 0.041464    | 1.28316 |
| Naa35         | NM_030153    | 0.0340125   | 1.28296 |
| Pex3          | NM_001164195 | 0.0373872   | 1.28279 |
| Snapi         | NM_133854    | 0.0385426   | 1.28271 |
| Brcc3         | NM_001166457 | 0.0435556   | 1.28257 |
| Mbd2          | NM_010773    | 0.0117957   | 1.28255 |
| Cir1          | NM_025854    | 0.0161906   | 1.28255 |
| Fbxl16        | NM_001164225 | 0.00758579  | 1.28251 |
| Tspo          | NM_009775    | 0.0217915   | 1.28237 |
| Zc3h10        | NM_134003    | 0.0300237   | 1.282   |
| Bnip3l        | NM_009761    | 0.000676273 | 1.28195 |
| Map3k7        | NM_009316    | 0.0235742   | 1.28177 |
| Mrpl33        | NM_025796    | 0.0165435   | 1.28167 |
| Mets2         | NM_025543    | 0.021288    | 1.28135 |
| Zfand2b       | NM_001159905 | 0.00165945  | 1.2813  |
| Srp14         | NM_009273    | 0.00827827  | 1.28114 |
| D730045B01Rik | XM_976855    | 0.00828301  | 1.28106 |
| Zeb2          | NM_015753    | 0.0336873   | 1.28101 |
| Riok2         | NM_025934    | 0.0249317   | 1.28083 |
| Plod1         | NM_011122    | 0.002885    | 1.28028 |
| Ralbp1        | NM_009067    | 8.28E-05    | 1.2802  |
| Snhg6         | NR_024067    | 0.037382    | 1.28018 |
| Masp1         | NM_008555    | 0.0049392   | 1.28006 |
| Sec11c        | NM_025468    | 0.0391427   | 1.28003 |
| Rbx1          | NM_019712    | 0.00782454  | 1.27972 |
| Trdn          | NM_029726    | 0.0196362   | 1.27955 |
| Tpp2          | NM_009418    | 0.0295958   | 1.27927 |
| Lnp           | NM_001110209 | 0.0356908   | 1.27922 |
| 1700025G04Rik | NM_197990    | 0.00550603  | 1.27914 |
| Zkscan1       | NM_029869_6  | 0.0449899   | 1.27898 |
| Fam126b       | NM_172513    | 0.0227895   | 1.27891 |
| Psph          | NM_133900    | 0.00819808  | 1.27888 |
| Chmp5         | NM_029814    | 0.0197646   | 1.27846 |
| Cyld          | NM_001128169 | 0.00359229  | 1.27822 |

|               |              |            |         |
|---------------|--------------|------------|---------|
| Hbb-b1        | NM_008220    | 0.00749142 | 1.27803 |
| Asf1a         | NM_025541    | 0.0292434  | 1.27802 |
| Zfp91         | NM_053009    | 0.00768675 | 1.27798 |
| Ninj1         | NM_013610    | 0.0274827  | 1.27794 |
| Bnip3         | NM_009760    | 0.041219   | 1.27789 |
| Susd4         | NM_144796    | 0.00950015 | 1.27774 |
| Mettl9        | NM_021554    | 0.00678523 | 1.27741 |
| Lrrc16b       | NM_001024645 | 0.0074915  | 1.27736 |
| Scrn3         | NM_029022    | 0.00325431 | 1.27717 |
| Sfrp1         | NM_013834    | 0.0250829  | 1.277   |
| 2810025M15Rik | NR_027984    | 0.0240025  | 1.27666 |
| Ammecr1l      | NM_153515    | 0.00754544 | 1.276   |
| Golga4        | NM_018748    | 0.0136967  | 1.27599 |
| Copb2         | NM_015827    | 0.0290681  | 1.27597 |
| Smurf2        | NM_025481    | 0.0302226  | 1.27567 |
| Il4ra         | NM_001008700 | 0.0243931  | 1.2756  |
| Rexol         | NM_025852    | 0.0175954  | 1.27553 |
| Socs2         | NM_001168655 | 0.0241899  | 1.27535 |
| Vwa5a         | NM_001145957 | 0.0118782  | 1.27514 |
| Fam45a        | NM_001167829 | 0.00792068 | 1.27493 |
| 2010305A19Rik | NM_027250    | 0.0458671  | 1.27458 |
| LOC100047123  | XM_001477443 | 0.036276   | 1.27454 |
| Bfar          | NM_001177552 | 0.00865434 | 1.27453 |
| Rps6          | NM_009096    | 0.0175221  | 1.27452 |
| Prpf38a       | NM_172697    | 0.0379639  | 1.27439 |
| Ptgir         | NM_008967    | 0.0385801  | 1.27437 |
| Utp3          | NM_023054    | 0.00215182 | 1.27436 |
| 2610029I01Rik | NM_029840    | 0.0224878  | 1.27403 |
| Hhip1l        | NM_001044380 | 0.00493777 | 1.27365 |
| C1galt1c1     | NM_021550    | 0.0249863  | 1.27353 |
| Magoh         | NM_010760    | 0.0377035  | 1.27333 |
| Hk3           | NM_001033245 | 0.00607233 | 1.27326 |
| Khdrbs1       | NM_011317    | 0.0180823  | 1.27316 |
| Ppfia1        | NM_001033319 | 0.00845641 | 1.27315 |
| Pdpm          | NM_010329    | 0.0224753  | 1.27307 |
| Luc7l3        | NM_026313    | 0.0413071  | 1.27295 |
| Zfp422-rs1    | NM_029952    | 0.00654776 | 1.27285 |
| Tbca          | NM_009321    | 0.0191308  | 1.2727  |
| Cetn2         | NM_019405    | 0.0394144  | 1.27267 |
| Atp6v1d       | NM_023721    | 0.0104978  | 1.27263 |
| Shfm1         | NM_009169    | 0.0144117  | 1.27225 |
| Papd7         | NM_001169131 | 0.0194956  | 1.27213 |



|            |              |             |         |
|------------|--------------|-------------|---------|
| Sfpq       | NM_023603    | 0.0170391   | 1.27171 |
| Dph5       | NM_027193    | 0.0284668   | 1.27162 |
| Fem1b      | NM_010193    | 0.0355076   | 1.2715  |
| Gjc1       | NM_001159382 | 0.0082253   | 1.2708  |
| Pdgfa      | NM_008808    | 0.00225678  | 1.2708  |
| Akr1a4     | NM_021473    | 0.00530813  | 1.2707  |
| Sfrs3      | NM_013663    | 0.0049045   | 1.27069 |
| Ssr3       | NM_026155    | 0.000604599 | 1.27062 |
| Pdgfd      | NM_027924    | 0.0313166   | 1.27011 |
| Snhg8      | NR_028574    | 0.0241226   | 1.27008 |
| Eif3e      | NM_008388    | 0.0174458   | 1.27002 |
| Atp6v1d    | NM_023721    | 0.0410716   | 1.27    |
| Sox9       | NM_011448    | 0.0435833   | 1.26999 |
| Etf1       | NM_144866    | 0.0100227   | 1.26958 |
| Sipa113    | NM_001081028 | 0.00565952  | 1.26955 |
| Rab33a     | NM_011228    | 0.0296901   | 1.26951 |
| Ppp2r5c    | NM_001081457 | 0.0197448   | 1.26944 |
| Bola2      | NM_175103    | 0.0157231   | 1.2694  |
| Spry2      | NM_011897    | 0.0143601   | 1.26938 |
| Pdcd6      | NM_011051    | 0.037428    | 1.26928 |
| Atad1      | NM_026487    | 0.0307398   | 1.26924 |
| Pdp2       | NM_001024606 | 0.00760677  | 1.26923 |
| Slmap      | NM_032008    | 0.0200879   | 1.26917 |
| Tax1bp1    | NM_025816    | 0.00501967  | 1.26913 |
| Dynll1     | NM_019682    | 0.0217415   | 1.26899 |
| Nfatc2     | NM_001037177 | 0.040691    | 1.26888 |
| Ssb        | NM_001110145 | 0.0326491   | 1.26872 |
| Cpt1a      | NM_013495    | 0.0139507   | 1.26852 |
| AK129341   | NM_001045524 | 0.0315949   | 1.26827 |
| Lmna       | NM_001002011 | 0.0107234   | 1.26783 |
| Ranbp1     | NM_011239    | 0.0181388   | 1.26766 |
| Rlim       | NM_011276    | 0.00683924  | 1.2676  |
| Pigx       | NM_001111025 | 0.0470498   | 1.26753 |
| Ptplad1    | NM_021345    | 0.0234566   | 1.26741 |
| Cd55       | NM_010016    | 0.0340812   | 1.26728 |
| Tln1       | NM_011602    | 0.0369189   | 1.26722 |
| Lztfl1     | NM_033322    | 0.029516    | 1.26722 |
| Stau2      | NM_001111272 | 0.0325403   | 1.26694 |
| Kalrn      | NM_001164268 | 0.0147341   | 1.26683 |
| Dnajc5     | NM_016775    | 0.00213006  | 1.26658 |
| Gnai3      | NM_010306    | 0.00405308  | 1.26632 |
| Nerna00081 | NR_027828    | 0.00106993  | 1.26603 |

|                 |              |             |         |
|-----------------|--------------|-------------|---------|
| Ptpmt1          | NM_025576    | 0.00271599  | 1.26596 |
| Yme1l1          | NM_013771    | 0.0103061   | 1.26575 |
| Lgals1          | NM_008495    | 0.00833711  | 1.26563 |
| Rprd2           | NM_001081293 | 0.0405918   | 1.26547 |
| Commd3          | NM_147778    | 0.0199379   | 1.26481 |
| Sfrs7           | NM_146083    | 0.0408983   | 1.26435 |
| Nfe2l2          | NM_010902    | 0.0286787   | 1.26426 |
| Kctd10          | NM_001159941 | 0.000207958 | 1.26391 |
| Creg1           | NM_011804    | 0.0234367   | 1.26382 |
| Mios            | NM_145374    | 0.00348657  | 1.26379 |
| Rg9mtd1         | NM_029092    | 0.0285141   | 1.26346 |
| Endod1          | NM_028013    | 0.000194631 | 1.26296 |
| 4833442J19Rik   | NM_177101    | 0.00622738  | 1.26275 |
| Tmem168         | NM_028990    | 0.0240765   | 1.26264 |
| Anxa2           | NM_007585    | 0.02039     | 1.26244 |
| Snx4            | NM_080557    | 0.038261    | 1.26239 |
| Rps6ka3         | NM_148945    | 0.0317224   | 1.26232 |
| Cnpy2           | NM_019953    | 0.011094    | 1.26197 |
| Zfp644          | NM_026856    | 0.0212559   | 1.26179 |
| Gng12           | NM_001177556 | 0.0135847   | 1.26161 |
| Glo1            | NM_001113560 | 0.0322719   | 1.26146 |
| ---             | ---          | 0.0483806   | 1.26073 |
| Zfp69           | NM_001005788 | 0.00894081  | 1.26071 |
| Wac             | NM_001146298 | 0.00498552  | 1.26068 |
| Crb3            | NM_177638    | 0.0261279   | 1.26057 |
| Ppp2r5c         | NM_001081457 | 0.0139155   | 1.26027 |
| Dlc1            | NM_015802    | 0.0109545   | 1.2602  |
| Ppil3           | NM_027351    | 0.0186506   | 1.26017 |
| Pdcd4           | NM_001168491 | 0.0109334   | 1.2601  |
| Gmfb            | NM_022023    | 0.0129933   | 1.26    |
| Rpl12           | NM_009076    | 0.00467157  | 1.25995 |
| 1500011K16Rik   | NR_015476    | 0.0194091   | 1.25987 |
| C330018D20Rik   | NM_029909    | 0.0320349   | 1.25983 |
| Alg13           | NM_026247    | 0.00117565  | 1.25974 |
| Gak             | NM_153569    | 0.0227715   | 1.25965 |
| Zfp426          | NM_001110309 | 0.00347484  | 1.25933 |
| Prdxdd1         | NM_001163454 | 0.0386833   | 1.25928 |
| Aars /// Exosc6 | NM_028274    | 0.00661273  | 1.25928 |
| Uba3            | NM_001111106 | 0.00339671  | 1.25913 |
| Tm2d2           | NM_027194    | 0.00249563  | 1.25911 |
| 4921506J03Rik   | NM_001033474 | 0.000246324 | 1.25887 |
| Mrs2            | NM_001013389 | 0.0453993   | 1.25874 |

|               |              |             |         |
|---------------|--------------|-------------|---------|
| 2810454H06Rik | NR_029441    | 0.0139586   | 1.25868 |
| Tomm70a       | NM_138599    | 0.000688318 | 1.25847 |
| Plvap         | NM_032398    | 0.0492382   | 1.25839 |
| Aste1         | NM_001164828 | 7.91E-05    | 1.25839 |
| Zfp652        | NM_201609    | 0.0372738   | 1.25827 |
| Rasgrp2       | NM_011242    | 0.0169524   | 1.25826 |
| Gtf2h2        | NM_022011    | 0.0252335   | 1.25787 |
| Nupl1         | NM_170591    | 0.0490668   | 1.25778 |
| Glmn          | NM_001161738 | 0.0435703   | 1.25772 |
| Vps24         | NM_025783    | 0.0106257   | 1.2575  |
| A530047J11Rik | ---          | 0.020289    | 1.25729 |
| Gm7669        | NM_016966    | 0.0421742   | 1.25715 |
| ---           | ---          | 0.0320432   | 1.25713 |
| Ipo5          | NM_023579    | 0.0359685   | 1.25682 |
| Glod4         | NM_026029    | 0.0109212   | 1.25682 |
| Psm6          | NM_011968    | 0.0137853   | 1.25676 |
| Lactb2        | NM_145381    | 0.0265163   | 1.25659 |
| Cgnl1         | NM_026599    | 0.0135016   | 1.25636 |
| Eif2a         | NM_001005509 | 0.0254727   | 1.25619 |
| Rspry1        | NM_026274    | 0.025344    | 1.25619 |
| Dtx2          | NM_023742    | 0.00571086  | 1.25618 |
| Nr1d2         | NM_011584    | 0.0177452   | 1.25598 |
| Tardbp        | NM_001003898 | 0.0401777   | 1.25597 |
| Prkg1         | NM_001013833 | 0.0256664   | 1.25591 |
| Bat2l         | NM_001159634 | 0.0317723   | 1.25576 |
| Tmem223       | NM_025791    | 0.0332514   | 1.2556  |
| Pgam5         | NM_001163538 | 0.0485403   | 1.2551  |
| Nr2f6         | NM_010150    | 0.0460679   | 1.25506 |
| ---           | ---          | 0.0207924   | 1.25504 |
| Nipa1         | NM_153578    | 0.0108279   | 1.25472 |
| Rpn1          | NM_133933    | 0.0123533   | 1.25456 |
| Gabpa         | NM_008065    | 0.00563651  | 1.25445 |
| Lefty1        | NM_010094    | 0.0267268   | 1.25443 |
| Rab11a        | NM_017382    | 0.0160841   | 1.25432 |
| AY036118      | XR_002323    | 0.0104444   | 1.25417 |
| Hn1           | NM_008258    | 0.014732    | 1.25411 |
| Wdr61         | NM_001025375 | 0.0280004   | 1.25409 |
| Esd           | NM_016903    | 0.014708    | 1.25372 |
| Rps7          | NM_011300    | 0.00679781  | 1.2536  |
| Sdcbp         | NM_001098227 | 0.0452862   | 1.25359 |
| Cib1          | NM_011870    | 0.0340153   | 1.25354 |
| Trappc2       | NM_025432    | 0.0411826   | 1.25353 |

|               |              |             |         |
|---------------|--------------|-------------|---------|
| Col4a5        | NM_001163155 | 0.0399379   | 1.2535  |
| Polr1d        | NM_009087    | 0.0107499   | 1.25349 |
| ---           | ---          | 0.00535797  | 1.25316 |
| Hist1h1c      | NM_015786    | 0.041794    | 1.25313 |
| Psm2          | NM_008944    | 0.0232472   | 1.25299 |
| Wdr20a        | NM_027149    | 0.0273968   | 1.25284 |
| Rbms3         | NM_001172121 | 0.0359299   | 1.2528  |
| Ddi2          | NM_001017966 | 0.0270767   | 1.25268 |
| Rpgr          | NM_001177950 | 0.00693433  | 1.25257 |
| Zzz3          | NM_001080755 | 0.00366988  | 1.25246 |
| B230312A22Rik | NM_172691    | 0.0020436   | 1.25234 |
| Lyrm4         | NM_201358    | 0.0403757   | 1.25233 |
| Pfn2          | NM_019410    | 0.00569807  | 1.25213 |
| Zwint         | NM_025635    | 0.025706    | 1.2521  |
| Psm6          | NM_025550    | 0.0244775   | 1.25206 |
| Vps29         | NM_019780    | 0.00677323  | 1.252   |
| Gtdc1         | NM_172662    | 0.0272245   | 1.25156 |
| Fem1b         | NM_010193    | 0.000958175 | 1.25132 |
| Gm13680       | NM_009094    | 0.00875416  | 1.2512  |
| Habp4         | NM_019986    | 0.0301811   | 1.25117 |
| Spcl          | NM_026911    | 0.00888029  | 1.25108 |
| Vps29         | NM_019780    | 0.0172738   | 1.25095 |
| Tbca          | NM_009321    | 0.0199175   | 1.25092 |
| Tomm20        | NM_024214    | 0.0195442   | 1.25091 |
| LOC100040573  | NM_028245    | 0.00171192  | 1.25083 |
| Rpl17-ps3     | NM_001002239 | 0.01452     | 1.25081 |
| Capza1        | NM_009797    | 0.0053605   | 1.25074 |
| Hprt          | NM_013556    | 0.0173723   | 1.25058 |
| Rpn1          | NM_133933    | 0.0269258   | 1.25058 |
| Ube2f         | NM_026454    | 0.0132511   | 1.25032 |
| Zfyve20       | NM_030081    | 0.00930068  | 1.25024 |
| Mapk10        | NM_001081567 | 0.0357866   | 1.25023 |
| Ccnh          | NM_023243    | 0.0182684   | 1.25021 |
| Fkbp3         | NM_013902    | 0.00810781  | 1.2502  |
| Ctdspl2       | NM_212450    | 0.0024936   | 1.25017 |
| 0610010B08Rik | NM_001177543 | 0.0245827   | 1.25015 |
| Cdc16         | NM_027276    | 0.0165872   | 1.24997 |
| Usp39         | NM_138592    | 0.00137881  | 1.24983 |
| Limch1        | NM_001001980 | 0.0477299   | 1.24977 |
| Zfp593        | NM_024215    | 0.0434396   | 1.24949 |
| Tax1bp1       | NM_025816    | 0.0122406   | 1.24934 |
| ---           | ---          | 0.0178374   | 1.24931 |

|          |              |             |         |
|----------|--------------|-------------|---------|
| Ppig     | NM_001081086 | 0.0168281   | 1.24926 |
| Usp2     | NM_016808    | 0.0305482   | 1.24868 |
| Polr1d   | NM_009087    | 0.0423512   | 1.24865 |
| Asxl2    | NM_172421    | 0.0244101   | 1.24852 |
| Tmx4     | NM_029148    | 0.0176505   | 1.24827 |
| Tmed5    | NM_028876    | 0.0029464   | 1.24809 |
| Pde6h    | NM_023898    | 0.0346434   | 1.24796 |
| Sar1b    | NM_025535    | 0.0204727   | 1.24792 |
| Nus1     | NM_030250    | 0.00325154  | 1.24781 |
| BC003331 | NM_001077237 | 0.0215913   | 1.24779 |
| Fam72a   | NM_175382    | 0.0322713   | 1.24767 |
| Tfdp2    | NM_001184706 | 0.0288708   | 1.24763 |
| Cnot4    | NM_001164411 | 0.0125049   | 1.24753 |
| Amn1     | NM_001113424 | 0.0349033   | 1.24753 |
| Srp54a   | NM_001100109 | 0.000666099 | 1.24715 |
| Suz12    | NM_001163018 | 0.0084089   | 1.24712 |
| Dync1i2  | NM_010064    | 0.0315441   | 1.24681 |
| Sub1     | NM_011294    | 0.0445867   | 1.24675 |
| Slc30a7  | NM_023214    | 0.035874    | 1.24665 |
| Gbe1     | NM_028803    | 0.00317498  | 1.24645 |
| Rnpc3    | NM_001038696 | 0.0321953   | 1.24641 |
| Gm6563   | NM_025364    | 0.00198144  | 1.24635 |
| ---      | ---          | 0.0472338   | 1.24605 |
| Synpo2   | NM_080451    | 0.00153561  | 1.24572 |
| Dnm2     | NM_001039520 | 0.00772124  | 1.24557 |
| Psm6     | NM_011968    | 0.00135101  | 1.24555 |
| ---      | ---          | 0.00887954  | 1.24529 |
| Hmgb1    | NM_010439    | 0.012188    | 1.24522 |
| Plaa     | NM_172695    | 0.00341741  | 1.24508 |
| Ptcd3    | NM_027275    | 0.0481021   | 1.24487 |
| Cdk2ap1  | NM_013812    | 0.00629294  | 1.24449 |
| Ccdc69   | NM_177471    | 0.018078    | 1.24435 |
| Rnasel   | NM_011882    | 0.0329759   | 1.24428 |
| Nenf     | NM_025424    | 0.0244123   | 1.24425 |
| Gm10079  | NM_013647    | 0.0044358   | 1.24421 |
| Dynlrb1  | NM_025947    | 0.0490148   | 1.24409 |
| Rhbdl1   | NM_144816    | 0.0265595   | 1.24402 |
| Cnih4    | NM_030131    | 0.0215256   | 1.24392 |
| Atp6v1g1 | NM_024173    | 0.0345629   | 1.24384 |
| Bnip3l   | NM_009761    | 0.00708326  | 1.24383 |
| Xiap     | NM_009688    | 0.00149112  | 1.24376 |
| Osbpl9   | NM_001134791 | 0.00683547  | 1.24361 |

|               |              |             |         |
|---------------|--------------|-------------|---------|
| Csnk1a1       | NM_146087    | 0.00178718  | 1.24358 |
| Rps12-ps2     | NM_011295    | 0.00728951  | 1.24345 |
| Snhg1         | NR_002896    | 0.0199406   | 1.24312 |
| Dhx36         | NM_028136    | 0.0277199   | 1.24297 |
| A430107O13Rik | NM_001081351 | 0.00276207  | 1.24297 |
| Pgk1          | NM_008828    | 0.0214425   | 1.24278 |
| Wbscr28       | NM_029681    | 0.0360682   | 1.24273 |
| Skp1a         | NM_011543    | 0.024682    | 1.24271 |
| Sft2d2        | NM_145512    | 0.00254265  | 1.24254 |
| Mobk13        | NM_025283    | 0.00865313  | 1.24247 |
| Myh9          | NM_022410    | 0.0208638   | 1.24243 |
| Pak1ip1       | NM_026550    | 0.0339408   | 1.24241 |
| Cfl2          | NM_007688    | 0.000631843 | 1.24238 |
| Prnp          | NM_011170    | 0.0383766   | 1.24218 |
| Zfp617        | NM_133358    | 0.0056002   | 1.24216 |
| Ttc4          | NM_001172073 | 0.037836    | 1.2421  |
| Caprin1       | NM_001111289 | 0.029712    | 1.24208 |
| Trim44        | NM_020267    | 0.0416151   | 1.24206 |
| Aggf1         | NM_025630    | 0.0036223   | 1.24186 |
| Uggt2         | NM_001081252 | 0.0158541   | 1.24145 |
| Jag1          | NM_013822    | 0.000733619 | 1.24143 |
| 7-Mar         | NM_020575    | 0.0342853   | 1.24127 |
| Dynll2        | NM_001168471 | 0.00634857  | 1.24096 |
| Ormdl1        | NM_145517    | 0.0274736   | 1.24081 |
| Insig2        | NM_133748    | 0.0147629   | 1.24065 |
| Map3k7        | NM_009316    | 0.0451847   | 1.24059 |
| Ube2e1        | NM_009455    | 0.0435551   | 1.24037 |
| Hars          | NM_008214    | 0.00961618  | 1.24035 |
| Cct4          | NM_009837    | 0.0131388   | 1.24023 |
| Rab18         | NM_011225    | 0.0284498   | 1.24018 |
| ---           | ---          | 0.0273866   | 1.24012 |
| Pkp2          | NM_026163    | 0.0300217   | 1.23998 |
| Ccdc21        | NM_144527    | 0.0211855   | 1.23973 |
| Derl2         | NM_033562    | 0.0100591   | 1.23949 |
| Axl           | NM_009465    | 0.0144826   | 1.23943 |
| Tmed7         | NM_025698    | 0.0162617   | 1.23943 |
| Avp1l         | NM_027106    | 0.019885    | 1.23924 |
| Ankrd10       | NM_001167967 | 0.0301878   | 1.23914 |
| Rock2         | NM_009072    | 0.0225937   | 1.23913 |
| Kdelr2        | NM_025841    | 0.00140363  | 1.23907 |
| ---           | ---          | 0.0392475   | 1.23901 |
| ---           | ---          | 0.013249    | 1.239   |

|           |              |            |         |
|-----------|--------------|------------|---------|
| Ikzf2     | NM_011770    | 0.0305405  | 1.23897 |
| Rap1b     | NM_024457    | 0.0232131  | 1.23892 |
| Tmem208   | NM_025486    | 0.040143   | 1.23879 |
| Ddit3     | NM_007837    | 0.00202426 | 1.23878 |
| Cnpy2     | NM_019953    | 0.00596373 | 1.23876 |
| Polr1d    | NM_009087    | 0.0372741  | 1.23875 |
| Fig4      | NM_133999    | 0.0350304  | 1.23855 |
| Bet11     | NM_018742    | 0.00300967 | 1.23854 |
| Cfl2      | NM_007688    | 0.0218534  | 1.23852 |
| Ddx21     | NM_019553    | 0.0122219  | 1.23841 |
| ---       | ---          | 0.00845832 | 1.23839 |
| Psma7     | NM_011969    | 0.0363193  | 1.23823 |
| Stk38l    | NM_172734    | 0.0303637  | 1.23821 |
| Atp1b1    | NM_009721    | 0.00943333 | 1.2382  |
| Rif1      | NM_175238    | 0.0497851  | 1.23762 |
| Ccnl1     | NM_019937    | 0.0499024  | 1.23758 |
| Sri       | NM_001080974 | 0.00720154 | 1.2369  |
| Chic2     | NM_028850    | 0.00762536 | 1.23657 |
| Nudt18    | NM_153136    | 0.0370394  | 1.23628 |
| Uhrf1bp1l | NM_029166    | 0.0402954  | 1.23623 |
| Znrf2     | NM_199143    | 0.00936175 | 1.23616 |
| Ankrd13c  | NM_001013806 | 0.00210643 | 1.23594 |
| Insig2    | NM_133748    | 0.0169057  | 1.23577 |
| Ufm1      | NM_026435    | 0.0121042  | 1.23564 |
| Atp6v0a2  | NM_011596    | 0.030416   | 1.23564 |
| Tatdn1    | NM_175151    | 0.0297142  | 1.23563 |
| Rusc2     | NM_001037709 | 0.0139871  | 1.23559 |
| Atg5      | NM_053069    | 0.0454225  | 1.23556 |
| Vps35     | NM_022997    | 0.00734246 | 1.23551 |
| Jam2      | NM_023844    | 0.0270607  | 1.23524 |
| Tmcc1     | NM_177412    | 0.00191533 | 1.23504 |
| BC018101  | NM_001005358 | 0.0363628  | 1.23499 |
| Sema3c    | NM_013657    | 0.0152611  | 1.23484 |
| Ddx52     | NM_030096    | 0.0197418  | 1.23465 |
| Usp53     | NM_133857    | 0.0438523  | 1.23449 |
| Uba5      | NM_025692    | 0.0240624  | 1.23444 |
| Sgms2     | NM_028943    | 0.0275479  | 1.23415 |
| Mrps24    | NM_026080    | 0.0216878  | 1.23405 |
| Gdap2     | NM_010269    | 0.00184907 | 1.23401 |
| Mical2    | NM_177282    | 0.0455725  | 1.23382 |
| Rps7      | NM_011300    | 0.0017447  | 1.23381 |
| Sfxn3     | NM_001178012 | 0.0341987  | 1.23378 |

|               |              |            |         |
|---------------|--------------|------------|---------|
| Ate1          | NM_001029895 | 0.0386915  | 1.23354 |
| Rnf141        | NM_025999    | 0.0038884  | 1.23353 |
| A430107O13Rik | NM_001081351 | 0.00793564 | 1.23338 |
| Parp4         | NM_001145978 | 0.0149166  | 1.23329 |
| Ing5          | NM_025454    | 0.0116704  | 1.23322 |
| Serinc1       | NM_019760    | 0.00128449 | 1.23321 |
| Myh10         | NM_175260    | 0.00350974 | 1.233   |
| Sgcg          | NM_011892    | 0.0382884  | 1.23292 |
| Pfdn5         | NM_027044    | 0.048684   | 1.23218 |
| Glrx3         | NM_023140    | 0.0266033  | 1.23212 |
| Nars2         | NM_153591    | 0.0136738  | 1.23196 |
| Fcf1          | NM_028632    | 0.0287706  | 1.23179 |
| Tm2d2         | NM_027194    | 0.00929839 | 1.23177 |
| Bicd1         | NM_001112796 | 0.0233721  | 1.2317  |
| Bet1l         | NM_018742    | 0.00780553 | 1.23158 |
| Ppm1b         | NM_001159496 | 0.0117855  | 1.23143 |
| 7-Sep         | NM_009859    | 0.0288215  | 1.23143 |
| 0610037L13Rik | NM_028754    | 0.044726   | 1.23142 |
| Fam125a       | NM_028617    | 0.00300642 | 1.23136 |
| Rbm45         | NM_153405    | 0.0342018  | 1.23034 |
| 3110021A11Rik | NR_030776    | 0.0450716  | 1.23004 |
| Dnaje1        | NM_007869    | 0.0124092  | 1.23001 |
| Herpud2       | NM_020586    | 0.0471692  | 1.22999 |
| Napg          | NM_028017    | 0.0222615  | 1.22987 |
| Cbx3          | NM_007624    | 0.0219129  | 1.22974 |
| 7-Sep         | NM_009859    | 0.0252324  | 1.22956 |
| Fxr1          | NM_001113188 | 0.0183416  | 1.22949 |
| Tm2d1         | NM_053157    | 0.0358244  | 1.22945 |
| Pik3ca        | NM_008839    | 0.0225389  | 1.22925 |
| Osbp19        | NM_001134791 | 0.00300142 | 1.22909 |
| Sel1l3        | NM_172710    | 0.0345923  | 1.22894 |
| Mrpl41        | NM_001031808 | 0.0389116  | 1.22888 |
| Pik3ca        | NM_008839    | 0.0266699  | 1.22886 |
| ---           | ---          | 0.00925895 | 1.22859 |
| Nudt4         | NM_027722    | 0.0493973  | 1.22845 |
| Ccdc142       | NM_001081266 | 0.00890871 | 1.22838 |
| Rpl34         | NM_001005859 | 0.00726789 | 1.22828 |
| Prdx1         | NM_011034    | 0.00633197 | 1.22823 |
| Mettl6        | NM_025907    | 0.00102806 | 1.22813 |
| ---           | ---          | 0.0204901  | 1.22789 |
| Ptpn12        | NM_011203    | 0.0147884  | 1.22763 |
| Arf2          | NM_007477    | 0.0100842  | 1.22756 |



|               |              |            |         |
|---------------|--------------|------------|---------|
| Ube2a         | NM_019668    | 0.00322709 | 1.22706 |
| Zfand1        | NM_025512    | 0.0346574  | 1.22697 |
| Tmem30a       | NM_133718    | 0.0173336  | 1.22662 |
| Rps12-ps2     | NM_011295    | 0.00554815 | 1.22655 |
| Taf9          | NM_001015889 | 0.0156849  | 1.22654 |
| Comt1         | NM_001111062 | 0.00495388 | 1.22645 |
| Prpf18        | NM_026045    | 0.00606645 | 1.22643 |
| Scrn2         | NM_146027    | 0.0237841  | 1.22643 |
| Ankra2        | NM_023472    | 0.0372534  | 1.22633 |
| Bad           | NM_007522    | 0.0274534  | 1.22633 |
| Gm10828       | NM_001114333 | 0.0297403  | 1.22624 |
| Ggps1         | NM_010282    | 0.0413353  | 1.22621 |
| Snx13         | NM_001014973 | 0.00177341 | 1.2261  |
| Ccdc74a       | NM_001166164 | 0.0246725  | 1.22609 |
| Eif3m         | NM_145380    | 0.0318997  | 1.22567 |
| Sec22b        | NM_011342    | 0.0403372  | 1.22559 |
| Ap3s1         | NM_009681    | 0.0481346  | 1.22553 |
| Rpl15         | NM_025586    | 0.00168728 | 1.22547 |
| Gigyf2        | NM_001110212 | 0.043437   | 1.22531 |
| Ppp3cb        | NM_008914    | 0.0474368  | 1.22476 |
| Wdr43         | NM_175639    | 0.00138267 | 1.22453 |
| Gatad1        | NM_026033    | 0.00142098 | 1.22429 |
| Pkp4          | NM_026361    | 0.0230878  | 1.22421 |
| Pcf11         | NM_029078    | 0.0422772  | 1.22416 |
| Ankle2        | NM_027922    | 0.00336615 | 1.22416 |
| Eif4ebp1      | NM_007918    | 0.0373425  | 1.22391 |
| Cryz11        | NM_133679    | 0.0286518  | 1.22383 |
| 2700060E02Rik | NM_026528    | 0.0134255  | 1.22373 |
| Yaf2          | NM_024189    | 0.0029512  | 1.22372 |
| Hnrpd1        | NM_016690    | 0.0464317  | 1.2236  |
| Gtf3c6        | NM_026113    | 0.0310908  | 1.22358 |
| Serpnb6a      | NM_001164117 | 0.0124093  | 1.22332 |
| Zbtb41        | NM_172643    | 0.0381973  | 1.22287 |
| Sft2d2        | NM_145512    | 0.0340973  | 1.22282 |
| Hist1h1c      | NM_015786    | 0.0202164  | 1.22263 |
| Fancb         | NM_001146081 | 0.00668463 | 1.22247 |
| Taf13         | NM_025444    | 0.014046   | 1.22242 |
| Slc38a9       | NM_178746    | 0.0127318  | 1.22239 |
| Tomm70a       | NM_138599    | 0.00654176 | 1.22232 |
| Strap         | NM_011499    | 0.0186459  | 1.22195 |
| Ttc35         | NM_025736    | 0.0164169  | 1.22194 |
| Rrs1          | NM_021511    | 0.0316518  | 1.22189 |

|          |              |            |         |
|----------|--------------|------------|---------|
| ---      | ---          | 0.0128547  | 1.22178 |
| ---      | ---          | 0.0282274  | 1.22174 |
| Bet11    | NM_018742    | 0.017349   | 1.22156 |
| Fam108a  | NM_145421    | 0.0349192  | 1.2214  |
| Igdcc3   | NM_008988    | 0.0397723  | 1.22136 |
| Zcchc4   | NM_030185    | 0.0104455  | 1.22126 |
| Sdf2     | NM_009143    | 0.005385   | 1.2211  |
| Tm2d2    | NM_027194    | 0.0197426  | 1.22109 |
| Tmco1    | NM_001039483 | 0.032562   | 1.2208  |
| Lsm11    | NM_028185    | 0.0242622  | 1.22078 |
| Capza2   | NM_007604    | 0.0143833  | 1.22054 |
| Usp47    | NM_133758    | 0.00327822 | 1.22052 |
| Ap3m1    | NM_018829    | 0.0142355  | 1.22049 |
| Erbp2ip  | NM_001005868 | 0.0491764  | 1.22032 |
| Pafah1b2 | NM_008775    | 0.0237827  | 1.22025 |
| Ang      | NM_001161731 | 0.044732   | 1.22024 |
| Spry2    | NM_011897    | 0.0260136  | 1.22009 |
| Pdik1l   | NM_001163794 | 0.0254893  | 1.21964 |
| Fam49b   | NM_144846    | 0.0419957  | 1.21956 |
| Snx6     | NM_026998    | 0.0409649  | 1.21956 |
| Strbp    | NM_009261    | 0.0115278  | 1.21941 |
| Lrrc59   | NM_133807    | 0.00112079 | 1.21924 |
| Pgrmc2   | NM_027558    | 0.0133865  | 1.21922 |
| Ninj1    | NM_013610    | 0.0495748  | 1.21903 |
| Raph1    | NM_001045513 | 0.00935023 | 1.21899 |
| Serinc3  | NM_012032    | 0.0212968  | 1.21857 |
| Brd7     | NM_012047    | 0.0343724  | 1.21856 |
| Rab5a    | NM_025887    | 0.00115721 | 1.21852 |
| Hspa13   | NM_030201    | 0.0354324  | 1.21813 |
| Hmmr     | NM_013552    | 0.0432094  | 1.21764 |
| ---      | ---          | 0.0386993  | 1.21762 |
| Rps6     | NM_009096    | 0.0144784  | 1.2176  |
| Fam188a  | NM_024185    | 0.0121118  | 1.21737 |
| Blvra    | NM_026678    | 0.0498172  | 1.21724 |
| Ube3a    | NM_001033962 | 0.026335   | 1.21717 |
| Nlrp10   | NM_175532    | 0.0303747  | 1.21714 |
| Ppp1r12b | NM_001081307 | 0.00568339 | 1.21695 |
| Glrx2    | NM_001038592 | 0.0250854  | 1.21676 |
| Psmbl1   | NM_011185    | 0.00452892 | 1.21649 |
| Fam193a  | NM_001030306 | 0.0312494  | 1.21646 |
| Trim33   | NM_001079830 | 0.00480547 | 1.21625 |
| Otud6b   | NM_152812    | 0.0204007  | 1.21624 |

|               |              |             |         |
|---------------|--------------|-------------|---------|
| Rod1          | NM_144904    | 0.00747548  | 1.21612 |
| Rpn1          | NM_133933    | 0.0285226   | 1.21609 |
| Ppp6c         | NM_024209    | 0.0424275   | 1.21594 |
| Phospho2      | NM_028521    | 0.0374087   | 1.21591 |
| Siah2         | NM_009174    | 0.0194988   | 1.21589 |
| Taf1a         | NM_021466    | 0.032854    | 1.21586 |
| Nhp2          | NM_026631    | 0.0350458   | 1.21575 |
| Txndc9        | NM_172054    | 0.0175494   | 1.21569 |
| D17Ert663e    | ---          | 0.00817497  | 1.21567 |
| Exoc6         | NM_175353    | 0.00477789  | 1.21563 |
| Kpna1         | NM_008465    | 0.0423838   | 1.21539 |
| Efha2         | NM_030110    | 0.0251485   | 1.21523 |
| Tmed2         | NM_019770    | 0.000141023 | 1.21512 |
| Psmbl         | NM_011185    | 0.00345431  | 1.21499 |
| Copg2as2      | NR_002845    | 0.0168716   | 1.2149  |
| Mtmr1         | NM_016985    | 0.0287421   | 1.21477 |
| Sike1         | NM_025679    | 0.00582982  | 1.21476 |
| Hnrnp         | NM_001170981 | 0.0240523   | 1.21472 |
| Ypel5         | NM_027166    | 0.0485451   | 1.21461 |
| Gins4         | NM_024240    | 0.0374526   | 1.21458 |
| Cse1l         | NM_023565    | 0.0334125   | 1.2145  |
| Pdgfa         | NM_008808    | 0.0311491   | 1.2144  |
| Ppp1r14b      | NM_008889    | 0.011049    | 1.21373 |
| Atg3          | NM_026402    | 0.0275477   | 1.21364 |
| Zfp81         | NM_207541    | 0.0142331   | 1.21288 |
| LOC100044953  | NM_172707    | 0.0314866   | 1.21284 |
| Npr3          | NM_001039181 | 0.0266918   | 1.21284 |
| Uba2          | NM_016682    | 0.0208271   | 1.2123  |
| Gspt1         | NM_001130008 | 0.0111976   | 1.21203 |
| Dnajc2        | NM_009584    | 0.0227055   | 1.21184 |
| Cct4          | NM_009837    | 0.0309533   | 1.21178 |
| Myeov2        | NM_001163425 | 0.00753439  | 1.21168 |
| Rpl22         | NM_009079    | 0.00493265  | 1.21166 |
| Zfp597        | NM_001033159 | 0.021432    | 1.21156 |
| Abhd13        | NM_001081119 | 0.0133686   | 1.21156 |
| A930033H14Rik | XR_002305    | 0.0123265   | 1.21143 |
| Qars          | NM_001168270 | 0.00646818  | 1.21119 |
| Eea1          | NM_001001932 | 0.0455315   | 1.2109  |
| Serinc3       | NM_012032    | 0.032757    | 1.21082 |
| Fam162a       | NM_027342    | 0.00252372  | 1.21074 |
| Nucks1        | NM_001145804 | 0.0380366   | 1.21073 |
| Taok1         | NM_144825    | 0.0217004   | 1.21066 |

|               |              |             |         |
|---------------|--------------|-------------|---------|
| Asb1          | NM_001039126 | 0.00696887  | 1.21058 |
| Slc39a1       | NM_013901    | 0.0481298   | 1.21052 |
| Eif2s2        | NM_026030    | 0.040739    | 1.2102  |
| Tead1         | NM_001166584 | 0.0178396   | 1.21009 |
| Atp6v1d       | NM_023721    | 0.0143639   | 1.21002 |
| Ddx18         | NM_025860    | 0.0107535   | 1.20997 |
| Tcf12         | NM_011544    | 0.014691    | 1.20982 |
| Zfp30         | NM_013705    | 0.0142731   | 1.2097  |
| 2510022D24Rik | XM_001004662 | 0.0304685   | 1.20967 |
| Slc4a4        | NM_001136260 | 0.00784505  | 1.20945 |
| Rab3gap1      | NM_178690    | 0.026332    | 1.2094  |
| Me2           | NM_145494    | 0.00383654  | 1.20917 |
| Snrnp25       | NM_030093    | 0.0225226   | 1.20883 |
| Zfp655        | NM_001083958 | 0.0127786   | 1.20858 |
| Plaa          | NM_172695    | 0.0480922   | 1.20819 |
| Sptlc2        | NM_011479    | 0.0369474   | 1.20808 |
| Calm3         | NM_007590    | 0.0179555   | 1.20805 |
| Gpr123        | NM_177469    | 0.0124186   | 1.20798 |
| Hnrmpu        | NM_016805    | 0.000709826 | 1.20797 |
| Tomm70a       | NM_138599    | 0.0082915   | 1.20797 |
| Cox19         | NM_197980    | 0.0183398   | 1.20793 |
| Sgtb          | NM_144838    | 0.00521479  | 1.20779 |
| Tpm4          | NM_001001491 | 0.0335275   | 1.20775 |
| Gm9811        | NM_025974    | 0.029863    | 1.20762 |
| Sod1          | NM_011434    | 0.0125911   | 1.20734 |
| Gm10257       | NM_008210    | 0.00716771  | 1.20687 |
| Acp1          | NM_001110239 | 0.0258651   | 1.20686 |
| Tspan12       | NM_173007    | 0.0210897   | 1.20685 |
| Agpat5        | NM_026792    | 0.0265137   | 1.20673 |
| Bzw1          | NM_025824    | 0.00920352  | 1.20666 |
| Tmed2         | NM_019770    | 0.000108595 | 1.20662 |
| Ahr           | NM_013464    | 0.00430973  | 1.20654 |
| Paip2         | NM_026420    | 0.000219344 | 1.20622 |
| 2310036O22Rik | NM_026760    | 0.00737425  | 1.206   |
| Angel2        | NM_021421    | 0.0317913   | 1.20595 |
| 1600012H06Rik | NM_001083880 | 0.0311186   | 1.20578 |
| Cntnap1       | NM_016782    | 0.0406575   | 1.20571 |
| Phf14         | NM_001168382 | 0.0346974   | 1.20551 |
| Lman1         | NM_001172062 | 0.0258071   | 1.20515 |
| Zfp644        | NM_026856    | 0.0089892   | 1.2049  |
| Leprot11      | NM_026609    | 0.00239309  | 1.20476 |
| Atp1b1        | NM_009721    | 0.0134481   | 1.20472 |

|               |              |            |         |
|---------------|--------------|------------|---------|
| Slc39a3       | NM_134135    | 0.00608149 | 1.20471 |
| Orc3l         | NM_001159563 | 0.049622   | 1.20452 |
| Slc38a2       | NM_175121    | 0.0478862  | 1.20445 |
| Tor1aip2      | NM_001160180 | 0.0346638  | 1.20428 |
| Usp28         | NM_175482    | 0.00884393 | 1.20419 |
| ---           | ---          | 0.0479723  | 1.20405 |
| Tmem85        | NM_026519    | 0.027211   | 1.20401 |
| Eif1ax        | NM_025437    | 0.028172   | 1.20396 |
| Mirlet7d      | NR_029656    | 0.0292411  | 1.20393 |
| Zfp622        | NM_144523    | 0.034194   | 1.2038  |
| Btg3          | NM_009770    | 0.0146012  | 1.20372 |
| Ablim2        | NM_001177696 | 0.0212535  | 1.20352 |
| Rnf139        | NM_175226    | 0.0145699  | 1.20345 |
| Etv3          | NM_001083318 | 0.028884   | 1.20333 |
| Prpf40b       | NM_018786    | 0.012206   | 1.20331 |
| Phf20l1       | NM_001081409 | 0.0249475  | 1.20312 |
| Txn1l         | NM_016792    | 0.01437    | 1.20302 |
| LOC100233175  | NM_001142937 | 0.0445882  | 1.20299 |
| Fam96b        | NM_026753    | 0.0476717  | 1.20269 |
| Rnf103        | NM_009543    | 0.017286   | 1.20255 |
| ---           | ---          | 0.0383149  | 1.20235 |
| Ccdc132       | NM_001167750 | 0.0378702  | 1.20223 |
| Csda          | NM_011733    | 0.0315444  | 1.20219 |
| Elp3          | NM_028811    | 0.0312108  | 1.20203 |
| Mettl6        | NM_025907    | 0.0449456  | 1.20192 |
| Txndc17       | NM_026559    | 0.0228106  | 1.20139 |
| Rpl36al       | NM_025589    | 0.0382412  | 1.20132 |
| Itfg1         | NM_028007    | 0.0109671  | 1.20131 |
| Zfp568        | NM_001033355 | 0.0221212  | 1.20118 |
| LOC100046086  | XM_001475550 | 0.0177865  | 1.20109 |
| Snrnp27       | NM_025665    | 0.0366219  | 1.20087 |
| Lima1         | NM_001113545 | 0.0422118  | 1.20083 |
| Papd4         | NM_133905    | 0.021656   | 1.20077 |
| Gatad1        | NM_026033    | 0.0430348  | 1.20055 |
| Cops2         | NM_009939    | 0.0208444  | 1.20028 |
| Fam54b        | NM_029759    | 0.0237876  | 1.20005 |
| Psmb3         | NM_011971    | 0.0106834  | 1.19966 |
| AA881470      | NM_172724    | 0.0169059  | 1.19953 |
| Endod1        | NM_028013    | 0.0471138  | 1.19943 |
| 1810063B05Rik | NM_174987    | 0.0410886  | 1.19928 |
| Sdcbp         | NM_001098227 | 0.00918571 | 1.19921 |
| Atg4a         | NM_174875    | 0.041199   | 1.19882 |

|               |              |             |         |
|---------------|--------------|-------------|---------|
| Mrps10        | NM_001146211 | 0.0277818   | 1.19875 |
| Gnai1         | NM_010305    | 0.0271135   | 1.19875 |
| Srp72         | NM_025691    | 0.000777513 | 1.19864 |
| Hnrnpk        | NM_025279    | 0.0418845   | 1.19849 |
| Ddx3x         | NM_010028    | 0.00121933  | 1.19836 |
| Gnl2          | NM_145552    | 0.0338318   | 1.19832 |
| Ube2d2        | NM_019912    | 0.0106822   | 1.19819 |
| Gpbp1         | NM_001122963 | 0.0210696   | 1.19817 |
| Slc38a2       | NM_175121    | 0.0271641   | 1.19808 |
| Bnip3l        | NM_009761    | 0.00185889  | 1.19803 |
| Ppp3ca        | NM_008913    | 0.0177998   | 1.1979  |
| Zfp322a       | NM_001111107 | 0.0261646   | 1.19748 |
| Psm1          | NM_027357    | 0.0214056   | 1.19719 |
| Tmpo          | NM_001080129 | 0.0422878   | 1.19712 |
| Hnrpd1        | NM_016690    | 0.0210041   | 1.19703 |
| LOC674712     | NM_008959    | 0.00574423  | 1.19681 |
| Bola2         | NM_175103    | 0.0484809   | 1.19668 |
| Msc           | NM_010827    | 0.0254853   | 1.19668 |
| Ccdc9         | NM_001136471 | 0.029943    | 1.19655 |
| Rnd3          | NM_028810    | 0.0333662   | 1.19633 |
| St8sia4       | NM_001159745 | 0.0485755   | 1.19612 |
| 1700020G03Rik | XM_979280    | 0.0377064   | 1.19602 |
| 0610012G03Rik | NR_027897    | 0.0118537   | 1.1959  |
| Rpl36         | NM_018730    | 0.00179661  | 1.19559 |
| Ndfip2        | NM_029561    | 0.0328057   | 1.19559 |
| Prkag2        | NM_001170555 | 0.0230401   | 1.19542 |
| Thumpd3       | NM_008188    | 0.00664306  | 1.19517 |
| Kif21a        | NM_001109040 | 0.0301615   | 1.19507 |
| Msi2          | NM_054043    | 0.00204285  | 1.19487 |
| Nhlrc2        | NM_025811    | 0.0499206   | 1.19485 |
| 4933404O12Rik | NR_015555    | 0.00430863  | 1.19468 |
| Adrm1         | NM_019822    | 0.0165182   | 1.19433 |
| ---           | ---          | 0.0227684   | 1.19432 |
| Txn1          | NM_011660    | 0.0207007   | 1.19424 |
| Mib2          | NM_145124    | 0.00676468  | 1.19407 |
| Tmco3         | NM_172282    | 0.00380377  | 1.19389 |
| Cyb5d1        | NM_001045525 | 0.00203048  | 1.19385 |
| Ppia          | NM_008907    | 0.0155541   | 1.19366 |
| Cox16         | NM_025461    | 0.0430167   | 1.19359 |
| Tm2d2         | NM_027194    | 0.0349497   | 1.19351 |
| Nmt1          | NM_008707    | 0.0110578   | 1.19318 |
| D17Wsu104e    | NM_080837    | 0.0295682   | 1.19242 |

|               |              |             |         |
|---------------|--------------|-------------|---------|
| ---           | ---          | 0.0266515   | 1.19235 |
| Rabep1        | NM_019400    | 0.00578869  | 1.19209 |
| Hip1          | NM_146001    | 0.0376816   | 1.19162 |
| Sfrs3         | NM_013663    | 0.018255    | 1.19161 |
| Zfp191        | NM_021559    | 0.0272921   | 1.19157 |
| Serf2         | NM_011354    | 0.0312724   | 1.1911  |
| Cbx5          | NM_001076789 | 0.0461916   | 1.19105 |
| D19Bwg1357e   | NM_177474    | 0.026756    | 1.19078 |
| Apex1         | NM_009687    | 0.0334298   | 1.19069 |
| Plcd1         | NM_019676    | 0.0343245   | 1.19055 |
| Lcmt1         | NM_025304    | 0.0326341   | 1.19049 |
| Naa50         | NM_028108    | 0.0272006   | 1.1903  |
| Cngl          | NM_009831    | 0.04527     | 1.18939 |
| Rabep1        | NM_019400    | 0.0308565   | 1.18939 |
| BC042782      | ---          | 0.0368641   | 1.18931 |
| Myeov2        | NM_001163425 | 0.0121984   | 1.1892  |
| Cdk2ap1       | NM_013812    | 0.00294747  | 1.18863 |
| 2700060E02Rik | NM_026528    | 0.0214946   | 1.18858 |
| Mrpl30        | NM_027098    | 0.0268953   | 1.18835 |
| Tab2          | NM_138667    | 0.00684262  | 1.18827 |
| Mrps18c       | NM_026826    | 0.0142691   | 1.18815 |
| Prkch         | NM_008856    | 0.0392415   | 1.18807 |
| Tomm7         | NM_025394    | 0.0417589   | 1.18805 |
| Arl8a         | NM_026823    | 0.0378696   | 1.18788 |
| Pycr2         | NM_133705    | 0.0264105   | 1.18754 |
| Mgat2         | NM_146035    | 0.0019198   | 1.18702 |
| Pgls          | NM_025396    | 0.0357585   | 1.187   |
| LOC100046166  | NM_001130457 | 0.00842185  | 1.18682 |
| Psm7          | NM_011969    | 0.00739504  | 1.18592 |
| Mtdh          | NM_026002    | 0.0488389   | 1.18592 |
| Skiv2l2       | NM_028151    | 0.0316025   | 1.18586 |
| Ssfa2         | NM_080558    | 0.00801738  | 1.18572 |
| Cct4          | NM_009837    | 0.0376921   | 1.18565 |
| Armex3        | NM_027870    | 0.0238369   | 1.18565 |
| Nudt4         | NM_027722    | 0.0496626   | 1.18534 |
| Slco3a1       | NM_001038643 | 0.00412932  | 1.18509 |
| Zfp451        | NM_133817    | 0.0485416   | 1.18466 |
| Dnaja4        | NM_021422    | 0.00446034  | 1.18463 |
| Spnb2         | NM_009260    | 0.048455    | 1.18463 |
| Tpm3          | NM_022314    | 0.0059367   | 1.18455 |
| Stk4          | NM_021420    | 0.000927452 | 1.18434 |
| ---           | ---          | 0.0171493   | 1.18433 |

|               |              |            |         |
|---------------|--------------|------------|---------|
| Utp14a        | NM_028276    | 0.00793464 | 1.18419 |
| Ccdc23        | NM_001038998 | 0.018252   | 1.1841  |
| Srp14         | NM_009273    | 0.0369462  | 1.18407 |
| Psmc6         | NM_025550    | 0.0241697  | 1.18371 |
| Paics         | NM_025939    | 0.0425818  | 1.18368 |
| Intu          | NM_175515    | 0.0300484  | 1.18364 |
| Larp7         | NM_138593    | 0.0360105  | 1.18358 |
| 2300009A05Rik | NM_027090    | 0.00596956 | 1.18354 |
| Kin           | NM_025280    | 0.00556271 | 1.18353 |
| Spns3         | NM_029932    | 0.0202655  | 1.18348 |
| Hba-a1        | NM_001083955 | 0.0267522  | 1.18334 |
| Stx8          | NM_018768    | 0.0182784  | 1.18334 |
| Insr          | NM_001033381 | 0.0437633  | 1.18322 |
| Ncl           | NM_010880    | 0.0371266  | 1.18299 |
| Gpihbp1       | NM_026730    | 0.0413883  | 1.18269 |
| Fbxo33        | NM_001033156 | 0.031756   | 1.18266 |
| Khdrbs1       | NM_011317    | 0.00295391 | 1.18261 |
| Wbp4          | NM_018765    | 0.0142087  | 1.18187 |
| Gm5081        | NM_001037746 | 0.0383335  | 1.18186 |
| Pklr          | NM_001099779 | 0.0292062  | 1.18165 |
| Arhgap5       | NM_009706    | 0.00264212 | 1.18149 |
| Nmt2          | NM_008708    | 0.0457585  | 1.1812  |
| Hint1         | NM_008248    | 0.00920074 | 1.1811  |
| Rab6          | NM_001163663 | 0.0185044  | 1.18088 |
| Ppig          | NM_001081086 | 0.04806    | 1.18067 |
| Hps3          | NM_001146323 | 0.0281584  | 1.18067 |
| C330018D20Rik | NM_029909    | 0.0417221  | 1.17943 |
| Cr11          | NM_013499    | 0.0202496  | 1.17924 |
| Arpc1b        | NM_023142    | 0.0157116  | 1.17903 |
| D6Wsu116e     | NM_026585    | 0.0297437  | 1.17898 |
| ---           | ---          | 0.0472729  | 1.1788  |
| Pros1         | NM_011173    | 0.0294136  | 1.17879 |
| Nubp1         | NM_011955    | 0.0201777  | 1.17874 |
| Morf4l1       | NM_001039147 | 0.00678371 | 1.17873 |
| 1110002B05Rik | NM_134054    | 0.0411411  | 1.17841 |
| Wdr45l        | NM_025793    | 0.0150998  | 1.17828 |
| 1300014I06Rik | NM_025831    | 0.0190053  | 1.17827 |
| Hmgn1         | NM_008251    | 0.00875168 | 1.17808 |
| LOC100045999  | NM_009391    | 0.00712218 | 1.17766 |
| Rpl17-ps3     | NM_001002239 | 0.0169871  | 1.17758 |
| Rpl12         | NM_009076    | 0.0391414  | 1.17755 |
| Strn3         | NM_001172098 | 0.00928961 | 1.17716 |



|               |              |            |         |
|---------------|--------------|------------|---------|
| 9130011J15Rik | NM_172396    | 0.0468266  | 1.177   |
| Gnl3          | NM_153547    | 0.0314175  | 1.17662 |
| Foxp1         | NM_053202    | 0.012561   | 1.17657 |
| Bik           | NM_007546    | 0.0447013  | 1.1764  |
| Plekhh3       | NM_146030    | 0.0143816  | 1.17626 |
| Vps13a        | NM_173028    | 0.031291   | 1.17607 |
| Evi5          | NM_007964    | 0.0188432  | 1.17587 |
| Nudt21        | NM_026623    | 0.0283984  | 1.17576 |
| Gosr2         | NM_019650    | 0.0149529  | 1.1756  |
| ---           | ---          | 0.0269197  | 1.17547 |
| Rnf19a        | NM_013923    | 0.0158726  | 1.17532 |
| Stk39         | NM_016866    | 0.0263066  | 1.17523 |
| Usp16         | NM_024258    | 0.0154342  | 1.1751  |
| Pla2r1        | NM_008867    | 0.0406371  | 1.17492 |
| Calm1         | NM_009790    | 0.0327236  | 1.17485 |
| Tmem85        | NM_026519    | 0.0220373  | 1.17446 |
| Rps6          | NM_009096    | 0.0250009  | 1.17443 |
| B230208H17Rik | NM_001024616 | 0.0186505  | 1.17396 |
| Dusp18        | NM_173745    | 0.0307036  | 1.17382 |
| Cpsf7         | NM_001164272 | 0.0101152  | 1.1738  |
| Slc39a10      | NM_172653    | 0.0335828  | 1.17318 |
| ---           | ---          | 0.0195169  | 1.17305 |
| Zscan21       | NM_001044703 | 0.048      | 1.1724  |
| Dnajc10       | NM_024181    | 0.0232978  | 1.1717  |
| Zfp651        | NM_001166644 | 0.0243169  | 1.17132 |
| Gtpbp1        | NM_013818    | 0.00263118 | 1.17096 |
| Rexo2         | NM_024233    | 0.0069377  | 1.17068 |
| 2310046K01Rik | NM_001164819 | 0.0279845  | 1.17054 |
| Atp1b1        | NM_009721    | 0.0179106  | 1.16943 |
| Mff           | NM_029409    | 0.019394   | 1.16908 |
| Gins3         | NM_030198    | 0.0447469  | 1.16906 |
| ---           | ---          | 0.0413394  | 1.16883 |
| Matr3         | NM_010771    | 0.0248011  | 1.16878 |
| Derl1         | NM_024207    | 0.0490381  | 1.16866 |
| Srp54a        | NM_001100109 | 0.00533625 | 1.16835 |
| Hnrnp1        | NM_028871    | 0.00666703 | 1.16817 |
| Gm3217        | NM_001013012 | 0.00669202 | 1.16808 |
| Sfrs6         | NM_026499    | 0.0376276  | 1.16805 |
| Prkag2        | NM_001170555 | 0.0282881  | 1.16775 |
| Slc35b2       | NM_028662    | 0.0180928  | 1.1677  |
| Fchsd2        | NM_001146010 | 0.0294299  | 1.16746 |
| Zranb2        | NM_017381    | 0.038731   | 1.16745 |

|               |              |            |         |
|---------------|--------------|------------|---------|
| Rpl35         | NM_025592    | 0.0115299  | 1.16731 |
| Zfp64         | NM_009564    | 0.00654483 | 1.16719 |
| Ube2g1        | NM_025985    | 0.0129011  | 1.16679 |
| BC010981      | ---          | 0.00551093 | 1.16671 |
| Pdcl3         | NM_026850    | 0.0414817  | 1.16649 |
| Snip2         | NM_001008238 | 0.0346243  | 1.16647 |
| Wnt9a         | NM_139298    | 0.0412287  | 1.16639 |
| Polr3k        | NM_025901    | 0.0373423  | 1.16631 |
| Lrrc48        | NM_029044    | 0.0168958  | 1.16631 |
| Rbbp4         | NM_009030    | 0.00393349 | 1.16581 |
| Bloc1s3       | NM_177692    | 0.0495816  | 1.16581 |
| Hnrp11        | NM_144802    | 0.0101344  | 1.16514 |
| Tpd52l2       | NM_025482    | 0.0140669  | 1.16511 |
| Skp1a         | NM_011543    | 0.0342978  | 1.16504 |
| Ipo4          | NM_024267    | 0.0370257  | 1.16486 |
| Tut1          | NM_197993    | 0.0426338  | 1.16484 |
| 3110035G12Rik | ---          | 0.0234016  | 1.16455 |
| Ptp4a2        | NM_001164745 | 0.0336057  | 1.16449 |
| Bicd2         | NM_001039179 | 0.020591   | 1.16448 |
| Mapre1        | NM_007896    | 0.00567612 | 1.16447 |
| Fkbp3         | NM_013902    | 0.0198525  | 1.16412 |
| Egfl3         | NM_010200    | 0.0427442  | 1.16407 |
| Tor1aip2      | NM_001160180 | 0.0429021  | 1.16396 |
| Podxl2        | NM_176973    | 0.029354   | 1.16365 |
| Trnau1ap      | NM_027925    | 0.0406873  | 1.16351 |
| Serf2         | NM_011354    | 0.0155167  | 1.16339 |
| Bmpr2         | NM_007561    | 0.0240253  | 1.16326 |
| Msrp3         | NM_177092    | 0.00761036 | 1.16307 |
| Zfp106        | NM_011743    | 0.0418898  | 1.16301 |
| Tpd52         | NM_001025261 | 0.0429651  | 1.16291 |
| Cdk14         | NM_011074    | 0.0432765  | 1.16279 |
| Wdr37         | NM_001039388 | 0.0460996  | 1.1627  |
| Arhgef3       | NM_027871    | 0.0193472  | 1.16254 |
| ---           | ---          | 0.0343206  | 1.16253 |
| Abhd13        | NM_001081119 | 0.0111578  | 1.16241 |
| Copg2as2      | NR_002845    | 0.0210146  | 1.16199 |
| Dnaja2        | NM_019794    | 0.00364308 | 1.16188 |
| Ssbp1         | NM_028358    | 0.0438409  | 1.16187 |
| Rbbp6         | NM_011247    | 0.00623409 | 1.16183 |
| Snrpe         | NM_009227    | 0.0295124  | 1.16167 |
| Tomm20        | NM_024214    | 0.0107394  | 1.16144 |
| Cnbp          | NM_001109745 | 0.0275201  | 1.16138 |

|               |              |            |         |
|---------------|--------------|------------|---------|
| Fubp1         | NM_057172    | 0.0339982  | 1.16119 |
| Vps4b         | NM_009190    | 0.0435507  | 1.16118 |
| LOC100046344  | NM_008704    | 0.00825661 | 1.16114 |
| Chchd1        | NM_025366    | 0.0147189  | 1.16107 |
| Rbbp7         | NM_009031    | 0.0442513  | 1.16083 |
| Usp8          | NM_019729    | 0.0356245  | 1.16059 |
| Gm10335       | NM_207523    | 0.00568942 | 1.16057 |
| Tm2d2         | NM_027194    | 0.03512    | 1.15987 |
| Cct6a         | NM_009838    | 0.0215193  | 1.15972 |
| Mbnl1         | NM_020007    | 0.00351165 | 1.15939 |
| Topors        | NM_134097    | 0.0442807  | 1.15928 |
| Ptpla         | NM_001012396 | 0.0176435  | 1.15922 |
| Ppp2r2c       | NM_172994    | 0.0164551  | 1.15899 |
| Pde1c         | NM_001025568 | 0.0119915  | 1.15887 |
| Ankrd54       | NM_144849    | 0.0138463  | 1.15854 |
| Syap1         | NM_025932    | 0.00644827 | 1.15817 |
| Cyfp1         | NM_001164661 | 0.0268974  | 1.15772 |
| Cyp2j6        | NM_010008    | 0.0424284  | 1.15759 |
| Rpl17-ps3     | NM_001002239 | 0.0157271  | 1.15752 |
| Smarca5       | NM_053124    | 0.021993   | 1.15727 |
| Gata6         | NM_010258    | 0.0411656  | 1.15711 |
| Eif4h         | NM_033561    | 0.0189647  | 1.1569  |
| Tmem168       | NM_028990    | 0.0240671  | 1.15624 |
| LOC640502     | NM_133806    | 0.0400525  | 1.1562  |
| Gm6142        | NM_009321    | 0.0301291  | 1.15573 |
| Ppm1a         | NM_008910    | 0.00603725 | 1.15526 |
| Ssbp4         | NM_133772    | 0.0458527  | 1.15507 |
| Fam179b       | NM_177805    | 0.0147862  | 1.15505 |
| Tmx3          | NM_198295    | 0.00918074 | 1.155   |
| Rsph3a        | NM_001083945 | 0.00662973 | 1.15487 |
| Klhl9         | NM_172871    | 0.0344863  | 1.1546  |
| Bmpr2         | NM_007561    | 0.0353248  | 1.15402 |
| Krit1         | NM_001170552 | 0.0108564  | 1.15388 |
| Dbn2          | NM_001048227 | 0.0446824  | 1.15386 |
| Tlk2          | NM_001112705 | 0.00676944 | 1.15371 |
| Sigmar1       | NM_011014    | 0.0422742  | 1.15363 |
| Serf2         | NM_011354    | 0.0319057  | 1.15344 |
| 2510006D16Rik | NM_029748    | 0.00189878 | 1.15317 |
| Ubxn4         | NM_026390    | 0.0324403  | 1.15309 |
| Mak16         | NM_026453    | 0.049006   | 1.15297 |
| Zrsr1         | NM_011663    | 0.00318208 | 1.15239 |
| Morf4l2       | NM_001168225 | 0.018066   | 1.1521  |

|               |              |            |         |
|---------------|--------------|------------|---------|
| Rbbp7         | NM_009031    | 0.0183806  | 1.15179 |
| Fam185a       | NM_177869    | 0.00451253 | 1.15173 |
| Mcl1          | NM_008562    | 0.0425457  | 1.15166 |
| Vamp4         | NM_016796    | 0.0260371  | 1.15166 |
| Eif5          | NM_173363    | 0.00160323 | 1.15129 |
| Serf2         | NM_011354    | 0.020875   | 1.15109 |
| Pphln1        | NM_001083114 | 0.0116707  | 1.15082 |
| Nr4a2         | NM_001139509 | 0.0200012  | 1.15082 |
| Rg9mtd2       | NM_175389    | 0.0327802  | 1.15067 |
| Fam3c         | NM_138587    | 0.0260113  | 1.1506  |
| Hnrnpc        | NM_001170981 | 0.0179863  | 1.15047 |
| Larp4         | NM_001024526 | 0.0345313  | 1.15033 |
| Tor1aip1      | NM_001160018 | 0.00107686 | 1.1501  |
| Ribc1         | NM_025660    | 0.0197193  | 1.1501  |
| ---           | ---          | 0.0474371  | 1.14993 |
| Fhl2          | NM_010212    | 0.0174393  | 1.14969 |
| Ppap2c        | NM_015817    | 0.033806   | 1.14954 |
| Cbfb          | NM_001161456 | 0.0244896  | 1.14949 |
| Cul3          | NM_016716    | 0.0348842  | 1.14935 |
| Cept1         | NM_133869    | 0.0191833  | 1.14874 |
| Rai14         | NM_001166408 | 0.0176214  | 1.14872 |
| Ankrd13c      | NM_001013806 | 0.0267624  | 1.14865 |
| Golga7        | NM_001042484 | 0.0245939  | 1.14856 |
| Gspt1         | NM_001130008 | 0.00980689 | 1.14851 |
| Vps54         | NM_139061    | 0.0286956  | 1.14835 |
| Rbms3         | NM_001172121 | 0.0444785  | 1.14796 |
| Ptges3        | NM_019766    | 0.0432366  | 1.14785 |
| Cyb5r4        | NM_024195    | 0.0263714  | 1.14779 |
| Gm15365       | NM_024214    | 0.00345154 | 1.14741 |
| Ppp1r2        | NM_025800    | 0.0165098  | 1.14729 |
| Gramd1a       | NM_027898    | 0.0244809  | 1.14672 |
| Rpl35         | NM_025592    | 0.0213398  | 1.14648 |
| Rasal2        | NM_177644    | 0.0199272  | 1.14613 |
| Uhrf1bp1l     | NM_029166    | 0.0371713  | 1.14612 |
| LOC675405     | NM_177393    | 0.0364187  | 1.14595 |
| Dazap1        | NM_001122604 | 0.0358825  | 1.14547 |
| 0610007L01Rik | NM_001081394 | 0.0159592  | 1.14545 |
| Arl5a         | NM_182994    | 0.0218423  | 1.14457 |
| Rps17         | NM_009092    | 0.00117084 | 1.14399 |
| Tmed5         | NM_028876    | 0.0344042  | 1.14396 |
| Tomm20        | NM_024214    | 0.0307838  | 1.14388 |
| Rpl7          | NM_011291    | 0.0145718  | 1.1438  |

|              |              |            |         |
|--------------|--------------|------------|---------|
| Csrp3        | NM_013808    | 0.00386503 | 1.14324 |
| Arpc2        | NM_029711    | 0.013177   | 1.14302 |
| Dnajc1       | NM_007869    | 0.00857234 | 1.14294 |
| Usp7         | NM_001003918 | 0.032283   | 1.1424  |
| Rab10        | NM_016676    | 0.036856   | 1.14222 |
| Ppib         | NM_011149    | 0.0460603  | 1.14214 |
| Tdrkh        | NM_028307    | 0.0490774  | 1.14192 |
| Ktn1         | NM_008477    | 0.00548544 | 1.14163 |
| Pfn2         | NM_019410    | 0.0476372  | 1.14149 |
| 5-Mar        | NM_001164336 | 0.0359451  | 1.14142 |
| Ank1         | NM_001110783 | 0.0457448  | 1.14139 |
| Rap1a        | NM_145541    | 0.021899   | 1.14118 |
| Lsm7         | NM_025349    | 0.0131128  | 1.14112 |
| Ube2d3       | NM_025356    | 0.0272402  | 1.1408  |
| Ythdf1       | NM_173761    | 0.0150154  | 1.1408  |
| Srd5a3       | NM_020611    | 0.0369292  | 1.14068 |
| Bmpr2        | NM_007561    | 0.00995378 | 1.14065 |
| Ttc37        | NM_001081352 | 0.00625042 | 1.14022 |
| Uimc1        | NM_011307    | 0.0464556  | 1.13929 |
| Tmed7        | NM_025698    | 0.0307245  | 1.13914 |
| Ift57        | NM_028680    | 0.016003   | 1.13889 |
| LOC100046168 | NM_022996    | 0.046759   | 1.13881 |
| Fkrp         | NM_173430    | 0.00689917 | 1.13879 |
| Mettl9       | NM_021554    | 0.020483   | 1.13832 |
| Atf1         | NM_007497    | 0.0399253  | 1.13811 |
| Ddx50        | NM_053183    | 0.0377142  | 1.13779 |
| Nupl1        | NM_170591    | 0.0282372  | 1.13727 |
| Bop1         | NM_013481    | 0.0484716  | 1.13718 |
| Rpl27a       | NM_011975    | 0.0209093  | 1.13663 |
| Rasa1        | NM_145452    | 0.0394048  | 1.13655 |
| Erlec1       | NM_025745    | 0.00165185 | 1.13637 |
| Rblcc1       | NM_009826    | 0.0421349  | 1.1357  |
| Zfx          | NM_001044386 | 0.0148058  | 1.13551 |
| Rps8         | NM_009098    | 0.0462416  | 1.13545 |
| Lrch2        | NM_001081173 | 0.0422931  | 1.13518 |
| Nek7         | NM_021605    | 0.024352   | 1.13375 |
| Rbm17        | NM_152824    | 0.0204022  | 1.13321 |
| Bccip        | NM_025392    | 0.0438322  | 1.13197 |
| Cdk12        | NM_001109626 | 0.017856   | 1.13197 |
| Rps17        | NM_009092    | 0.0025328  | 1.13196 |
| Rps6         | NM_009096    | 0.017904   | 1.13172 |
| Tmed2        | NM_019770    | 0.00350016 | 1.13142 |

|               |              |             |         |
|---------------|--------------|-------------|---------|
| Rpl23a        | NM_207523    | 0.00192195  | 1.13093 |
| Def6          | NM_027185    | 0.0405627   | 1.13089 |
| Capza2        | NM_007604    | 0.0166948   | 1.13088 |
| Cln5          | NM_001033242 | 0.0335557   | 1.13077 |
| Strap         | NM_011499    | 0.0402127   | 1.13011 |
| Rbbp4         | NM_009030    | 0.0262703   | 1.12956 |
| 2410127L17Rik | NM_026120    | 0.0329038   | 1.1291  |
| Gm9790        | NM_001112668 | 0.0454217   | 1.12861 |
| Psm6          | NM_011968    | 0.00412153  | 1.12779 |
| Gm3362        | NM_207523    | 0.00844333  | 1.12774 |
| Akirin1       | NM_023423    | 0.0266014   | 1.1277  |
| Glud1         | NM_008133    | 0.0393407   | 1.12729 |
| Sephs2        | NM_009266    | 0.0328806   | 1.12714 |
| Rps5          | NM_009095    | 0.0260186   | 1.12698 |
| Zfp511        | NM_027201    | 0.0202555   | 1.12686 |
| Gba2          | NM_172692    | 0.0428703   | 1.12582 |
| Zbtb43        | NM_001025594 | 0.0334188   | 1.12574 |
| 1700123O20Rik | NM_021437    | 0.031317    | 1.12567 |
| Gm10119       | NM_016959    | 0.00685163  | 1.1253  |
| Casq2         | NM_009814    | 0.0134507   | 1.12524 |
| 5730494N06Rik | NM_001141971 | 0.0381945   | 1.12503 |
| Etf1          | NM_144866    | 0.0226827   | 1.12491 |
| Slc39a13      | NM_026721    | 0.0411987   | 1.12453 |
| Wwp1          | NM_177327    | 0.033028    | 1.12408 |
| Eif3e         | NM_008388    | 0.0100345   | 1.12404 |
| Rpl7l1        | NM_025433    | 0.0430169   | 1.12402 |
| Pgk1          | NM_008828    | 0.0127045   | 1.12339 |
| Fuca2         | NM_025799    | 0.0421127   | 1.12229 |
| Rpl10a        | NM_011287    | 0.0414314   | 1.12172 |
| Gm15500       | NM_016980    | 0.00639719  | 1.12115 |
| C78339        | NM_001033192 | 0.0220279   | 1.12107 |
| Topors        | NM_134097    | 0.038647    | 1.12106 |
| Bnip2         | NM_001008238 | 0.0478571   | 1.12103 |
| Vamp3         | NM_009498    | 0.00886942  | 1.12057 |
| Snx12         | NM_001110310 | 0.0161241   | 1.12056 |
| Clock         | NM_007715    | 0.022381    | 1.12031 |
| Cdk2ap1       | NM_013812    | 0.0323054   | 1.1203  |
| Rpl19         | NM_001159483 | 0.000500327 | 1.12019 |
| Uba2          | NM_016682    | 0.0180682   | 1.12008 |
| Synj2bp       | NM_025292    | 0.0483672   | 1.11972 |
| Fam108b       | NM_146096    | 0.0333529   | 1.11924 |
| Mr1           | NM_008209    | 0.0360896   | 1.11903 |

|              |              |            |         |
|--------------|--------------|------------|---------|
| Rpsa         | NM_011029    | 0.0172604  | 1.11854 |
| Ssr3         | NM_026155    | 0.019941   | 1.1185  |
| Sike1        | NM_025679    | 0.0217665  | 1.11847 |
| Ccdc72       | NM_183250    | 0.0458094  | 1.11768 |
| Lsm14a       | NM_025948    | 0.0271295  | 1.11762 |
| Lck          | NM_001162432 | 0.020602   | 1.11716 |
| Nono         | NM_023144    | 0.0410011  | 1.11697 |
| Cycs         | NM_007808    | 0.0181979  | 1.11671 |
| Rnf130       | NM_021540    | 0.0406419  | 1.11669 |
| Rps14        | NM_020600    | 0.0210803  | 1.11634 |
| Hba-a1       | NM_001083955 | 0.0305316  | 1.11502 |
| Rpl18a       | NM_029751    | 0.0166733  | 1.11501 |
| Tmem134      | NM_001078649 | 0.011934   | 1.11483 |
| Wdr26        | NM_145514    | 0.0474627  | 1.11454 |
| Sfxn1        | NM_027324    | 0.0163597  | 1.1141  |
| Cyfp1        | NM_001164661 | 0.0493014  | 1.11326 |
| Zfand3       | NM_148926    | 0.0127445  | 1.11318 |
| Nup107       | NM_134010    | 0.0464617  | 1.11312 |
| Rpl7         | NM_011291    | 0.0480031  | 1.1128  |
| Ube2d3       | NM_025356    | 0.0136859  | 1.11262 |
| Gzfl         | NM_028986    | 0.0363892  | 1.11244 |
| Rpl41        | NM_018860    | 0.00700756 | 1.11191 |
| Rpl35a-ps2   | NM_001130484 | 0.0187826  | 1.11188 |
| Csnk1a1      | NM_146087    | 0.0124433  | 1.11168 |
| Rusc1        | NM_001083807 | 0.0391224  | 1.11159 |
| Gm6245       | NM_145441    | 0.00577741 | 1.11058 |
| Fbxo38       | NM_134136    | 0.0309255  | 1.10983 |
| LOC100046199 | NM_025316    | 0.0155352  | 1.10979 |
| Tor2a        | NM_152800    | 0.0396006  | 1.1096  |
| Rpl10        | NM_052835    | 0.0470851  | 1.10913 |
| Pcdh19       | NM_001105245 | 0.0397799  | 1.10882 |
| LOC636537    | NM_025965    | 0.0060942  | 1.10813 |
| Cycs         | NM_007808    | 0.0113813  | 1.10802 |
| Gdi2         | NM_008112    | 0.0415373  | 1.10716 |
| Caml         | NM_007596    | 0.0369076  | 1.10636 |
| Uqcrc2       | NM_025899    | 0.0398356  | 1.10624 |
| Pafah1b1     | NM_013625    | 0.0129952  | 1.10624 |
| Gm9385       | NM_024218    | 0.0198971  | 1.10588 |
| H2-T18       | XM_912024    | 0.0258177  | 1.10536 |
| Pcx          | NM_001162946 | 0.00767855 | 1.10526 |
| G3bp2        | NM_001080794 | 0.00693125 | 1.10502 |
| Shfm1        | NM_009169    | 0.0209759  | 1.10464 |

|               |              |             |          |
|---------------|--------------|-------------|----------|
| 5830408B19Rik | ---          | 0.0213329   | 1.10462  |
| Pcnp          | NM_001024622 | 0.0382364   | 1.10352  |
| Ppp1cc        | NM_013636    | 0.000787704 | 1.10335  |
| Rpl15         | NM_025586    | 0.0353713   | 1.1031   |
| Acot13        | NM_025790    | 0.0250129   | 1.10227  |
| Nucks1        | NM_001145804 | 0.0180364   | 1.10188  |
| Gtpbp6        | NM_145147    | 0.0360069   | 1.10166  |
| Ceng1         | NM_009831    | 0.0136928   | 1.10128  |
| Ppp2r2d       | NM_026391    | 0.0214217   | 1.10089  |
| Ranbp3        | NM_027933    | 0.0142037   | 1.1002   |
| Gapdh         | NM_008084    | 0.0463824   | 1.10009  |
| Arr3          | NM_133205    | 0.0416614   | 1.10008  |
| Tial1         | NM_009383    | 0.00986966  | 1.09976  |
| Rps4x         | NM_009094    | 0.0400421   | 1.09973  |
| 2310003H01Rik | NM_027980    | 0.0287385   | 1.09962  |
| Hspa8         | NM_031165    | 0.0321297   | 1.09921  |
| Nkap          | NM_025937    | 0.0475825   | 1.09885  |
| Gm10241       | NM_133354    | 0.0220002   | 1.09758  |
| Adss          | NM_007422    | 0.0201298   | 1.09685  |
| Rab1          | NM_008996    | 0.0395208   | 1.09458  |
| Lgtn          | NM_001136070 | 0.028617    | 1.09254  |
| Mtap          | NM_024433    | 0.0299923   | 1.09253  |
| Sp4           | NM_001166385 | 0.0480876   | 1.09216  |
| Cdkn2aip      | NM_172407    | 0.0371244   | 1.09102  |
| Tial1         | NM_009383    | 0.0281261   | 1.08891  |
| Prdx1         | NM_011034    | 0.0400468   | 1.08782  |
| Arglu1        | NM_176849    | 0.0218843   | 1.08708  |
| Srr           | NM_001163311 | 0.0138014   | 1.08381  |
| LOC100046895  | NM_001159516 | 0.0286113   | 1.0832   |
| Rplp1         | NM_018853    | 0.0340253   | 1.08299  |
| Mdh1          | NM_008618    | 0.0278302   | 1.08291  |
| Gm13654       | NM_009096    | 0.0241543   | 1.07572  |
| Mycbp2        | NM_207215    | 0.0190294   | 1.07569  |
| Rpl23a        | NM_207523    | 0.0403084   | 1.0647   |
| Chchd2        | NM_024166    | 0.0311548   | 1.05708  |
| Mbd2          | NM_010773    | 0.0476231   | 1.04394  |
| Atp5j2        | NM_020582    | 0.036825    | 1.04377  |
| Rps8-ps1      | NM_009098    | 0.0166694   | 1.03742  |
| 2810422J05Rik | NM_019883    | 0.0373834   | 1.03252  |
| BC032203      | NM_001100452 | 0.0291815   | -1.05191 |
| Mrpl51        | NM_025595    | 0.0378974   | -1.05646 |
| Zkscan1       | NM_029869    | 0.0452622   | -1.06033 |



|               |              |             |          |
|---------------|--------------|-------------|----------|
| Golga5        | NM_013747    | 0.0128369   | -1.06558 |
| Rc3h1         | NM_001024952 | 0.035088    | -1.06723 |
| Sepp1         | NM_001042613 | 0.0489094   | -1.06778 |
| Gja1          | NM_010288    | 0.0011754   | -1.07088 |
| Cox7a2l       | NM_001159529 | 0.0409573   | -1.07222 |
| Fam53a        | NM_178390    | 0.0274837   | -1.07269 |
| Cast          | NM_009817    | 0.0218266   | -1.07503 |
| Acbd3         | NM_133225    | 0.0243335   | -1.07656 |
| Timm44        | NM_011592    | 0.0285759   | -1.07892 |
| Ube3c         | NM_133907    | 0.0455167   | -1.07902 |
| Scamp5        | NM_020270    | 0.0403324   | -1.07948 |
| Map2k5        | NM_011840    | 0.0391381   | -1.08092 |
| E230029C05Rik | NR_015614    | 0.0159953   | -1.0834  |
| Nbr1          | NM_008676    | 0.0350023   | -1.08448 |
| Rps2-ps6      | NM_008503    | 0.0406344   | -1.08488 |
| Cox4i1        | NM_009941    | 0.00779073  | -1.08504 |
| Ap1g1         | NM_009677    | 0.0467618   | -1.0871  |
| Arfrp1        | NM_001165991 | 0.0286637   | -1.08833 |
| Yif1a         | NM_026553    | 0.0386803   | -1.08891 |
| Cdkn2aipnl    | NM_029976    | 0.0295546   | -1.08989 |
| Ndufa3        | NM_025348    | 0.0434897   | -1.08997 |
| Ndufa12       | NM_025551    | 0.0391161   | -1.09072 |
| Cox7a2l       | NM_001159529 | 0.0421091   | -1.09153 |
| Hbs1l         | NM_001042593 | 0.0248287   | -1.09186 |
| D8Erttd82e    | NM_172911    | 0.0408748   | -1.09308 |
| Park7         | NM_020569    | 0.0265365   | -1.09313 |
| Pebp1         | NM_018858    | 0.0282801   | -1.09348 |
| Myoz2         | NM_021503    | 0.0328854   | -1.09528 |
| Cct7          | NM_007638    | 0.00304964  | -1.09561 |
| 2210018M11Rik | NM_172280    | 0.0468796   | -1.09605 |
| 2610034B18Rik | NM_027420    | 0.0232082   | -1.09628 |
| Rps2-ps6      | NM_008503    | 0.0151163   | -1.09642 |
| Lbr           | NM_133815    | 0.0190759   | -1.0972  |
| Hnrpd1        | NM_016690    | 0.0375605   | -1.09735 |
| Ssbp1         | NM_028358    | 0.0455456   | -1.09787 |
| Api5          | NM_007466    | 0.0149146   | -1.09841 |
| Spint2        | NM_001082548 | 0.0454019   | -1.09855 |
| Ccdc28a       | NM_144820    | 0.0468449   | -1.09969 |
| Dcp2          | NM_027490    | 0.0291969   | -1.09973 |
| Appbp2        | NM_025825    | 0.000842369 | -1.09977 |
| Cytsa         | NM_001145826 | 0.00961346  | -1.10006 |
| Atp5b         | NM_016774    | 0.0281971   | -1.10063 |

|               |              |            |          |
|---------------|--------------|------------|----------|
| Cox7a2l       | NM_001159529 | 0.00295527 | -1.10124 |
| Slc35a2       | NM_001083937 | 0.0474954  | -1.10155 |
| AA960436      | NM_133954    | 0.0320279  | -1.10164 |
| Gm16515       | NM_025294    | 0.00551207 | -1.1035  |
| Rbms1         | NM_001141931 | 0.0216313  | -1.10364 |
| Ssrp1         | NM_001136081 | 0.0455177  | -1.10415 |
| Gnb5          | NM_010313    | 0.0152734  | -1.1046  |
| ---           | ---          | 0.0141341  | -1.10473 |
| Papd5         | NM_001164497 | 0.0172901  | -1.10554 |
| Slc25a3       | NM_133668    | 0.0140225  | -1.10793 |
| Ndufs6        | NM_010888    | 0.0152342  | -1.10793 |
| Zmym3         | NM_001177985 | 0.0238365  | -1.10906 |
| Sat2          | NM_026991    | 0.012885   | -1.11036 |
| Phldb1        | NM_153537    | 0.0423088  | -1.11116 |
| Ndufab1       | NM_028177    | 0.0108466  | -1.11122 |
| Sult5a1       | NM_020564    | 0.00898049 | -1.11141 |
| 9930105H17Rik | XM_914869    | 0.0332764  | -1.11156 |
| Mrpl28        | NM_024227    | 0.028303   | -1.11236 |
| Arhgap27      | NM_133715    | 0.0182553  | -1.11239 |
| Naif1         | NM_194335    | 0.00814127 | -1.11242 |
| 4632411B12Rik | NM_172652    | 0.0419164  | -1.11246 |
| Tcf4          | NM_001083967 | 0.0493521  | -1.11295 |
| Abhd12        | NM_024465    | 0.0282066  | -1.11297 |
| Agk           | NM_023538    | 0.0171526  | -1.11306 |
| Abhd4         | NM_134076    | 0.0451591  | -1.1134  |
| Ndst2         | NM_010811    | 0.037167   | -1.11345 |
| Tmem131       | NM_018872    | 0.0353513  | -1.11352 |
| Kcnj11        | NM_010602    | 0.0408712  | -1.11356 |
| 1110020A21Rik | NR_027929    | 0.0301261  | -1.11362 |
| LOC100048050  | NM_001081298 | 0.0107517  | -1.11367 |
| Zcche24       | NM_001101433 | 0.0257365  | -1.11474 |
| Bcl10         | NM_009740    | 0.018537   | -1.11505 |
| Pesk7         | NM_008794    | 0.0405306  | -1.11537 |
| Mfn1          | NM_024200    | 0.0348317  | -1.1154  |
| Lars2         | NM_153168    | 0.0286322  | -1.11586 |
| Dcaf7         | NM_027946    | 0.0340495  | -1.11621 |
| Slc9a3r2      | NM_023055    | 0.047851   | -1.11632 |
| Cbx7          | NM_144811    | 0.0236769  | -1.11634 |
| Rab10         | NM_016676    | 0.0198729  | -1.1166  |
| Nfib          | NM_001113209 | 0.0302536  | -1.11728 |
| ---           | ---          | 0.0177389  | -1.11783 |
| 4732418C07Rik | NM_172698    | 0.0227166  | -1.11909 |

|               |              |            |          |
|---------------|--------------|------------|----------|
| Lrch4         | NM_001081962 | 0.0114137  | -1.11918 |
| Hps4          | NM_138646    | 0.00360548 | -1.11964 |
| Taf6          | NM_009315    | 0.0160237  | -1.11984 |
| Ap2m1         | NM_009679    | 0.0373085  | -1.12096 |
| Abl2          | NM_001136104 | 0.0172658  | -1.12133 |
| Yif1a         | NM_026553    | 0.0342439  | -1.12134 |
| Sync          | NM_023485    | 0.0174766  | -1.12143 |
| Preb          | NM_016703    | 0.043218   | -1.12235 |
| Clock         | NM_007715    | 0.0224229  | -1.12235 |
| Gart          | NM_010256    | 0.0122818  | -1.12256 |
| Akr1b3        | NM_009658    | 0.0492168  | -1.12262 |
| Zfp292        | NM_013889    | 0.0293771  | -1.12262 |
| Thap2         | NM_025780    | 0.010662   | -1.12272 |
| Otud3         | NM_028453    | 0.0181018  | -1.12396 |
| Dedd          | NM_001128609 | 0.0440955  | -1.12412 |
| Suds3         | NM_001122666 | 0.033311   | -1.12482 |
| Dnm2          | NM_001039520 | 0.0183801  | -1.12512 |
| Atp13a2       | NM_001164366 | 0.0460633  | -1.12557 |
| Rnf123        | NM_032543    | 0.0425227  | -1.12563 |
| Ubr5          | NM_001081359 | 0.0464137  | -1.12566 |
| Tspan31       | NM_025982    | 0.0107797  | -1.12566 |
| 3000002C10Rik | NR_033215    | 0.0350688  | -1.12655 |
| Thtpa         | NM_153083    | 0.0147919  | -1.12661 |
| Pknox1        | NM_016670    | 0.0085596  | -1.12672 |
| Llg1          | NM_001159404 | 0.0284193  | -1.12679 |
| Cdc42bpa      | NM_001033285 | 0.0429321  | -1.1268  |
| Lancel2       | NM_133737    | 0.00495498 | -1.12708 |
| Polk          | NM_012048    | 0.033373   | -1.12719 |
| F11r          | NM_172647    | 0.043017   | -1.1273  |
| Pi4ka         | NM_001001983 | 0.0347414  | -1.12738 |
| Gramd3        | NM_026240    | 0.0477787  | -1.12841 |
| Ndufb7        | NM_025843    | 0.0332918  | -1.12854 |
| Tirap         | NM_001177845 | 0.0413197  | -1.129   |
| Fam120c       | NM_198105    | 0.0479936  | -1.12925 |
| Trmt1         | NM_001164559 | 0.0480108  | -1.1293  |
| Glcc1         | NM_133236    | 0.0342961  | -1.1294  |
| ---           | ---          | 0.0438417  | -1.12946 |
| Ap1s1         | NM_007457    | 0.0141242  | -1.12952 |
| Gja1          | NM_010288    | 0.0222299  | -1.13031 |
| Gja1          | NM_010288    | 0.00259221 | -1.13077 |
| Aco1          | NM_007386    | 0.0377615  | -1.13107 |
| Tmub1         | NM_022418    | 0.0265616  | -1.1322  |

|               |              |            |          |
|---------------|--------------|------------|----------|
| Fam54b        | NM_029759    | 0.0479652  | -1.13234 |
| Setdb1        | NM_001163641 | 0.0401422  | -1.13291 |
| Rprd1b        | NM_027434    | 0.0385592  | -1.13316 |
| Daam1         | NM_026102    | 0.0322541  | -1.1333  |
| Fam149b       | NM_001024512 | 0.0159664  | -1.13335 |
| Vps13b        | NM_177151    | 0.0263726  | -1.13421 |
| BC031781      | NM_145943    | 0.0390122  | -1.13441 |
| Atp5a1        | NM_007505    | 0.0351334  | -1.1346  |
| Baz1b         | NM_011714    | 0.0279507  | -1.1346  |
| Syne1         | NM_001079686 | 0.0377343  | -1.1352  |
| Romo1         | NM_001164215 | 0.0225021  | -1.13555 |
| Mon2          | NM_001163024 | 0.00284982 | -1.13579 |
| Entpd6        | NM_172117    | 0.013919   | -1.13626 |
| 1110036O03Rik | NM_176830    | 0.0495902  | -1.13627 |
| Smer8         | NM_001085440 | 0.0364011  | -1.13632 |
| Terf2         | NM_001083118 | 0.00470828 | -1.13637 |
| Asah2         | NM_018830    | 0.0423391  | -1.13658 |
| Tpi1          | NM_009415    | 0.0164617  | -1.13715 |
| Surf4         | NM_011512    | 0.0393487  | -1.13726 |
| Stk25         | NM_021537    | 0.00747294 | -1.1373  |
| Atxn7         | NM_139227    | 0.0310036  | -1.1374  |
| Ugp2          | NM_139297    | 0.0144107  | -1.13757 |
| Ergic3        | NM_025516    | 0.0411787  | -1.13776 |
| Lpgat1        | NM_001134829 | 0.031305   | -1.13785 |
| Fam63b        | NM_172772    | 0.0402874  | -1.13794 |
| Ptpdc1        | NM_207232    | 0.00535458 | -1.13798 |
| Bsc12         | NM_001136064 | 0.042521   | -1.13818 |
| Pisd          | NM_177298    | 0.0490696  | -1.13819 |
| Zfp512        | NM_172993    | 0.0012102  | -1.13826 |
| Btbd9         | NM_027060    | 0.0114655  | -1.1389  |
| Tle1          | NM_011599    | 0.0413631  | -1.13906 |
| ---           | ---          | 0.0491389  | -1.13928 |
| 9430083A17Rik | NR_029463    | 0.0110999  | -1.1393  |
| Trip12        | NM_133975    | 0.00412441 | -1.13932 |
| Pdxk          | NM_172134    | 0.0405553  | -1.13942 |
| Slc25a38      | NM_144793    | 0.0143544  | -1.13973 |
| BC026585      | NM_001033284 | 0.0362892  | -1.13987 |
| Slc9a3r1      | NM_012030    | 0.0424816  | -1.14093 |
| Ak1           | NM_021515    | 0.0287939  | -1.14122 |
| Chkb          | NM_007692    | 0.0354499  | -1.14125 |
| A130082M07Rik | XM_001471582 | 0.0330357  | -1.14204 |
| Htt           | NM_010414    | 0.0248083  | -1.14243 |

|               |              |             |          |
|---------------|--------------|-------------|----------|
| Emp2          | NM_007929    | 0.0194663   | -1.14278 |
| Ep400         | NM_029337    | 0.00118374  | -1.14279 |
| Hsd1l         | NM_175185    | 0.000296279 | -1.14316 |
| Lamb1-1       | NM_008482    | 0.0301884   | -1.14333 |
| Rce1          | NM_023131    | 0.0380096   | -1.14344 |
| 4921506J03Rik | NM_001033474 | 0.0209224   | -1.14359 |
| Atp5d         | NM_025313    | 0.0075911   | -1.1438  |
| Fbxl20        | NM_028149    | 0.00625121  | -1.14381 |
| Neil1         | NM_028347    | 0.0401305   | -1.14401 |
| Lrrc2         | NM_028838    | 0.0246854   | -1.14409 |
| Nagpa         | NM_013796    | 0.0141733   | -1.14433 |
| Hmgcs1        | NM_145942    | 0.000122931 | -1.14473 |
| Akr7a5        | NM_025337    | 0.0443407   | -1.14478 |
| Uaca          | NM_028283    | 0.0041176   | -1.14494 |
| Exosc2        | NM_144886    | 0.0468417   | -1.14547 |
| Uck1          | NM_011675    | 0.0338297   | -1.14557 |
| Fam116a       | NM_001134465 | 0.0297754   | -1.14576 |
| Ppp1ca        | NM_031868    | 0.025638    | -1.14609 |
| Abhd14a       | NM_001110271 | 0.0305109   | -1.14649 |
| ---           | ---          | 0.0386806   | -1.1466  |
| Cog4          | NM_133973    | 0.0117397   | -1.14676 |
| Sulf2         | NM_028072    | 0.0273056   | -1.14695 |
| Orai1         | NM_175423    | 0.0472328   | -1.14709 |
| Rusc1         | NM_001083807 | 0.0145591   | -1.1473  |
| Agpat6        | NM_018743    | 0.0293435   | -1.14806 |
| Ino80c        | NM_172625    | 0.0177356   | -1.14817 |
| Pat1l         | NM_172635    | 0.043041    | -1.14838 |
| Pitpnb        | NM_019640    | 0.0206666   | -1.14865 |
| Fance         | NM_001163819 | 0.0175894   | -1.14892 |
| Ralgapb       | NM_177658    | 0.0178831   | -1.14897 |
| Otud4         | NM_001081164 | 0.0350416   | -1.14898 |
| Psen1         | NM_008943    | 0.0084927   | -1.14911 |
| BC056474      | NM_001001493 | 0.0165954   | -1.14956 |
| Lipa          | NM_001111100 | 0.022306    | -1.14975 |
| Araf          | NM_001159645 | 0.0101454   | -1.14984 |
| Man1a2        | NM_010763    | 0.0345944   | -1.14999 |
| 9130404D08Rik | NM_001167939 | 0.041699    | -1.1501  |
| Eps8 ///      |              |             |          |
| LOC632638     | NM_007945    | 0.0291841   | -1.15029 |
| Nedd4l        | NM_001114386 | 0.0209135   | -1.15032 |
| Tmem147       | NM_027215    | 0.0267373   | -1.15048 |
| Pet112l       | NM_144896    | 0.025232    | -1.15048 |

|               |              |             |          |
|---------------|--------------|-------------|----------|
| Phb           | NM_008831    | 0.0488118   | -1.15095 |
| Scamp3        | NM_011886    | 0.0113262   | -1.1513  |
| Cenpc1        | NM_007683    | 0.0249866   | -1.15137 |
| Tmcc1         | NM_177412    | 0.0270323   | -1.15179 |
| Sec63         | NM_153055    | 0.0475307   | -1.1518  |
| Mybbp1a       | NM_016776    | 0.0263281   | -1.15187 |
| Rora          | NM_013646    | 0.0174377   | -1.15204 |
| Mapre2        | NM_001162941 | 0.0406649   | -1.15219 |
| Pigu          | NM_001004721 | 0.0313314   | -1.15238 |
| Rxra          | NM_011305    | 0.036853    | -1.15238 |
| Snd1          | NM_019776    | 0.028765    | -1.15244 |
| Atp5d         | NM_025313    | 0.0403443   | -1.15268 |
| Mpdz          | NM_010820    | 0.0391619   | -1.15297 |
| Gfce          | NM_033320    | 0.0384505   | -1.15303 |
| Ctbp2         | NM_001170744 | 0.00816648  | -1.15331 |
| Becn1         | NM_019584    | 0.0117468   | -1.15364 |
| Azi2          | NM_001048146 | 0.0290845   | -1.15393 |
| 1700081L11Rik | NM_001081045 | 0.0178524   | -1.15404 |
| Ing5          | NM_025454    | 0.010434    | -1.15427 |
| ---           | ---          | 0.0103999   | -1.15442 |
| Trip12        | NM_133975    | 0.0455517   | -1.15464 |
| Dpf2          | NM_011262    | 0.0220577   | -1.15485 |
| Bcl10         | NM_009740    | 0.000125797 | -1.15485 |
| Rasgrp3       | NM_001166493 | 0.043988    | -1.15509 |
| Cs            | NM_026444    | 0.0455535   | -1.15515 |
| Mecp2         | NM_001081979 | 0.0315663   | -1.15515 |
| Snx19         | NM_028874    | 0.025338    | -1.15533 |
| Itpr2         | NM_010586    | 0.0277973   | -1.1554  |
| Ubp1          | NM_001083319 | 0.0251873   | -1.15559 |
| Hirip3        | NM_172746    | 0.0100845   | -1.15569 |
| Tfpt          | NM_023524    | 0.0117919   | -1.15587 |
| Arhgef1       | NM_001130150 | 0.00487386  | -1.15608 |
| Cdc45         | NM_001161623 | 0.0411968   | -1.15611 |
| Tcf25         | NM_001037877 | 0.0182271   | -1.15622 |
| Ogfr          | NM_031373    | 0.0139568   | -1.15656 |
| Gpr107        | NM_178760    | 0.0307184   | -1.15665 |
| Fkbp1a        | NM_008019    | 0.0289214   | -1.15668 |
| Zdhhc7        | NM_133967    | 0.0202416   | -1.1567  |
| Ldhb          | NM_008492    | 0.0456836   | -1.15715 |
| C230076A16Rik | ---          | 0.0162641   | -1.15716 |
| Kcmf1         | NM_019715    | 0.0240007   | -1.15727 |
| Ctnnbip1      | NM_001141930 | 0.0468908   | -1.15748 |

|               |              |             |          |
|---------------|--------------|-------------|----------|
| Ergic3        | NM_025516    | 0.0422201   | -1.15786 |
| 2310035K24Rik | NM_027129    | 0.0419824   | -1.15795 |
| R3hdm1        | NM_181750    | 0.0491349   | -1.15875 |
| Fbxo11        | NM_001081034 | 0.0313356   | -1.15894 |
| Slc38a7       | NM_172758    | 0.047531    | -1.1591  |
| Zfp33b        | XM_001487796 | 0.0377538   | -1.15912 |
| Ncor1         | NM_011308    | 0.0217012   | -1.15928 |
| Vldlr         | NM_001161420 | 0.026949    | -1.15951 |
| Samhd1        | NM_001139520 | 0.0467512   | -1.15954 |
| Pkmyt1        | NM_023058    | 0.00764094  | -1.15957 |
| Atad3a        | NM_179203    | 0.0344394   | -1.15973 |
| Umps          | NM_009471    | 0.000842361 | -1.16023 |
| Atp2c1        | NM_175025    | 0.0380952   | -1.16028 |
| Oxnad1        | NM_145460    | 0.0243402   | -1.16029 |
| Pogz          | NM_001165948 | 0.0354825   | -1.16073 |
| Tmem150a      | NM_144916    | 0.0207686   | -1.16094 |
| Gmppa         | NM_133708    | 0.011367    | -1.16105 |
| Mia3          | NM_177389    | 0.017865    | -1.1611  |
| Gm7535        | NM_001115132 | 0.00257338  | -1.16137 |
| Usp48         | NM_130879    | 0.00151494  | -1.16139 |
| Sik3          | NM_027498    | 0.0144769   | -1.16149 |
| ---           | ---          | 0.048886    | -1.1617  |
| Otub1         | NM_134150    | 0.0372993   | -1.16184 |
| Gm4792        | NM_174999    | 0.0147861   | -1.1619  |
| Laptm4b       | NM_033521    | 0.0240862   | -1.16243 |
| Acs14         | NM_001033600 | 0.0192305   | -1.16257 |
| Heatr6        | NM_145432    | 0.0144882   | -1.16263 |
| Kpnb1         | NM_008379    | 0.0292292   | -1.16273 |
| Scgb3a1       | NM_054037    | 0.0160016   | -1.16286 |
| Mark1         | NM_145515    | 0.0336382   | -1.16295 |
| Zbtb10        | NM_177660    | 0.0190494   | -1.16304 |
| Lpgat1        | NM_001134829 | 0.00604897  | -1.16315 |
| Psm2          | NM_134101    | 0.0113657   | -1.16412 |
| Stat6         | NM_009284    | 0.0457813   | -1.16412 |
| Kbtbd13       | NM_028974    | 0.0330672   | -1.16448 |
| Ebf1          | NM_007897    | 0.00874828  | -1.16463 |
| Nrp2          | NM_001077403 | 0.0351367   | -1.16469 |
| Gne           | NM_015828    | 0.0180226   | -1.1647  |
| Gm608         | NM_001029889 | 0.0168229   | -1.16486 |
| Idua          | NM_008325    | 0.021068    | -1.165   |
| 4732471D19Rik | NM_176987    | 0.0124861   | -1.16505 |
| Tmem123       | NM_133739    | 0.0357672   | -1.16526 |

|         |              |             |          |
|---------|--------------|-------------|----------|
| Rfk     | NM_019437    | 0.0349049   | -1.1654  |
| Gm5595  | NM_001008427 | 0.0356015   | -1.16576 |
| Fam20b  | NM_145413    | 0.0488917   | -1.16578 |
| Mfsd6   | NM_133829    | 0.0380147   | -1.1658  |
| Zfp667  | NM_001024928 | 0.0374388   | -1.1658  |
| Mylk3   | NM_175441    | 0.0209528   | -1.16595 |
| Zfp672  | NM_178761    | 0.0104586   | -1.16599 |
| Cd47    | NM_010581    | 0.0384414   | -1.16601 |
| Top3b   | NM_011624    | 0.0185342   | -1.16629 |
| Ubr2    | NM_001177374 | 0.0312355   | -1.16646 |
| Pion    | NM_175437    | 0.0261232   | -1.16656 |
| Tuba3a  | NM_009446    | 0.0475268   | -1.16672 |
| Os9     | NM_001171026 | 0.0425503   | -1.16678 |
| Ubac2   | NM_026861    | 0.0240051   | -1.16702 |
| Trpc4ap | NM_001163452 | 0.0143582   | -1.16706 |
| ---     | ---          | 0.0435187   | -1.1672  |
| Slc4a4  | NM_001136260 | 0.0350574   | -1.16724 |
| Casp7   | NM_007611    | 0.0238455   | -1.16724 |
| Sri     | NM_001080974 | 0.0129326   | -1.16731 |
| Pde5a   | NM_153422    | 0.0189159   | -1.16739 |
| Mef2a   | NM_001033713 | 0.026226    | -1.1676  |
| Pik3ca  | NM_008839    | 0.024357    | -1.16779 |
| Cd2bp2  | NM_027353    | 0.0427488   | -1.16792 |
| Ick     | NM_001163780 | 0.0176958   | -1.16795 |
| Ccdc127 | NM_001168658 | 0.0420238   | -1.16808 |
| Gnaq    | NM_008139    | 0.00893629  | -1.1681  |
| Klhl20  | NM_001039482 | 0.00764141  | -1.16815 |
| Dym     | NM_027727    | 0.034104    | -1.16855 |
| Nomo1   | NM_153057    | 0.0431913   | -1.16877 |
| Acot11  | NM_025590    | 0.0335283   | -1.16885 |
| Mgea5   | NM_023799    | 0.0387232   | -1.16907 |
| Cops7b  | NM_172974    | 0.00914956  | -1.16936 |
| Tmem38b | NM_028053    | 0.0219209   | -1.16961 |
| Csflr   | NM_001037859 | 0.00998072  | -1.16997 |
| Dlat    | NM_145614    | 0.00937299  | -1.17026 |
| Coil    | NM_016706    | 0.046972    | -1.17031 |
| Zfp318  | NM_021346    | 0.0374799   | -1.17049 |
| ---     | ---          | 0.000954522 | -1.17058 |
| Tle6    | NM_053254    | 0.0392957   | -1.17059 |
| Sydel   | NM_027875    | 0.0287704   | -1.17063 |
| Fbl     | NM_007991    | 0.031728    | -1.17088 |
| Phf20   | NM_172674    | 0.0226641   | -1.17094 |



|               |              |             |          |
|---------------|--------------|-------------|----------|
| Ezh1          | NM_007970    | 0.0082954   | -1.17098 |
| Extl3         | NM_018788    | 0.0251292   | -1.17103 |
| 4933439F18Rik | NM_025757    | 0.0120264   | -1.17105 |
| Kctd21        | NM_001039039 | 0.0163733   | -1.17159 |
| Etf1          | NM_144866    | 0.0343284   | -1.17162 |
| 2310035C23Rik | NM_029349    | 0.0127676   | -1.17165 |
| Klhdc3        | NM_001163729 | 0.00346275  | -1.17208 |
| Mapt          | NM_001038609 | 0.0441669   | -1.17227 |
| D10Wsu52e     | NM_145422    | 0.042882    | -1.17233 |
|               | NM_001163145 |             |          |
| 1810041L15Rik | 5            | 0.0385215   | -1.17279 |
| Pex10         | NM_001042407 | 0.0161871   | -1.17324 |
| 4833420G11Rik | ---          | 0.00979669  | -1.17328 |
| Mrps25        | NM_025578    | 0.0459062   | -1.17333 |
| Gja1          | NM_010288    | 0.00206743  | -1.17342 |
| Hectd3        | NM_175244    | 0.0196145   | -1.17371 |
| Sstr4         | NM_009219    | 0.0420143   | -1.17372 |
| 5830462P14Rik | ---          | 0.0162235   | -1.17376 |
| Hexa          | NM_010421    | 0.00635476  | -1.17386 |
| Gm9853        | ---          | 0.0485323   | -1.17387 |
| Cnot4         | NM_001164411 | 0.0124737   | -1.17397 |
| Tbc1d9b       | NM_029745    | 0.0126274   | -1.17399 |
| Pwp1          | NM_133993    | 0.0127947   | -1.174   |
| St3gal3       | NM_001161774 | 0.0118653   | -1.17448 |
| Phb2          | NM_007531    | 0.0150102   | -1.17458 |
| Tcf7l2        | NM_001142918 | 0.0208408   | -1.17479 |
| Mrps9         | NM_023514    | 0.0181533   | -1.1749  |
| Sharpin       | NM_025340    | 0.000661273 | -1.17497 |
| Actl6a        | NM_019673    | 0.0392087   | -1.17562 |
| H13           | NM_001159551 | 0.0477952   | -1.17573 |
| Ppm1g         | NM_008014    | 0.0209822   | -1.17598 |
| C030046I01Rik | NM_177994    | 0.0449719   | -1.17624 |
| Dok4          | NM_053246    | 0.0448038   | -1.17627 |
| 1600014C10Rik | NM_001085385 | 0.0138682   | -1.17641 |
| Mbtps1        | NM_001167910 | 0.0385965   | -1.17643 |
| Srd5a1        | NM_175283    | 0.0380525   | -1.17648 |
| Senp2         | NM_029457    | 0.0443388   | -1.17689 |
| Fam107b       | NM_025626    | 0.0359904   | -1.17699 |
| Tmem44        | NM_172614    | 0.0125903   | -1.17708 |
| Itga3         | NM_013565    | 0.0243481   | -1.17718 |
| Unc93b1       | NM_001161428 | 0.0326775   | -1.17728 |
| Rhobtb2       | NM_153514    | 0.0303704   | -1.17729 |

|               |              |             |          |
|---------------|--------------|-------------|----------|
| ---           | ---          | 0.00352464  | -1.1773  |
| Glrx5         | NM_028419    | 0.0270214   | -1.17752 |
| Rogdi         | NM_133185    | 0.0482305   | -1.17753 |
| Gabarap       | NM_019749    | 0.000876621 | -1.17764 |
| Zfp422        | NM_026057    | 0.0391162   | -1.17765 |
| Lrrc61        | NM_001110160 | 0.0309694   | -1.17773 |
| Ubp1          | NM_001083319 | 0.00539366  | -1.17774 |
| Wdr35         | NM_001159527 | 0.0357803   | -1.17776 |
| Creb3l2       | NM_178661    | 0.0227871   | -1.17789 |
| Map3k3        | NM_011947    | 0.0052633   | -1.1785  |
| Ipo13         | NM_146152    | 0.0349435   | -1.17862 |
| Plxna4        | NM_175750    | 0.0333314   | -1.17879 |
| 3110003A17Rik | NM_028440    | 0.0394011   | -1.17881 |
| Wiz           | NM_011717    | 0.032223    | -1.17882 |
| Paxip1        | NM_018878    | 0.0288706   | -1.17904 |
| Nr4a2         | NM_001139509 | 0.0160598   | -1.17906 |
| Pitpnc1       | NM_145823    | 0.0410967   | -1.1791  |
| Phlpp1        | NM_133821    | 0.0479345   | -1.17922 |
| Mknk1         | NM_021461    | 0.0332566   | -1.17932 |
| Rfx7          | NM_001033536 | 0.027575    | -1.17952 |
| Zfp82         | NM_177889    | 0.0367525   | -1.17975 |
| Ift172        | NM_026298    | 0.0184561   | -1.17983 |
| Batf          | NM_016767    | 0.00864258  | -1.17983 |
| Amotl1        | NM_001081395 | 0.0127246   | -1.18005 |
| Sgcb          | NM_011890    | 0.0223283   | -1.18013 |
| Idh1          | NM_001111320 | 0.0179175   | -1.18022 |
| Cep110        | NM_012018    | 0.0425215   | -1.18035 |
| Cyb5b         | NM_025558    | 0.0418178   | -1.1804  |
| Zfp398        | NM_027477    | 0.0336317   | -1.18059 |
| ---           | ---          | 0.0424899   | -1.18079 |
| Lpcat1        | NM_145376    | 0.0477571   | -1.18087 |
| Ecd           | NM_027475    | 0.0212684   | -1.1809  |
| Mybbp1a       | NM_016776    | 0.0481173   | -1.1809  |
| Klhdc4        | NM_145605    | 0.0252108   | -1.18103 |
| Gucy1a3       | NM_021896    | 0.0310929   | -1.18104 |
| Tmbim6        | NM_001171034 | 0.0286726   | -1.18143 |
| Tmed1         | NM_010744    | 0.009745    | -1.1816  |
| Ntsr2         | NM_008747    | 0.0127963   | -1.18164 |
| Tbc1d10a      | NM_134023    | 0.034789    | -1.18166 |
| Plxna3        | NM_008883    | 0.0164491   | -1.18202 |
| Vdac1         | NM_011694    | 0.0146745   | -1.18204 |
| Agap1         | NM_001037136 | 0.0298962   | -1.18204 |

|               |              |             |          |
|---------------|--------------|-------------|----------|
| Pigv          | NM_001145955 | 0.0395328   | -1.18205 |
| Sdccag3       | NM_001085407 | 0.047763    | -1.18265 |
| Speg          | NM_001085370 | 0.0396738   | -1.18269 |
| Hmgcs1        | NM_145942    | 0.00661575  | -1.1827  |
| Thra          | NM_178060    | 0.0131328   | -1.18287 |
| Zdhhc5        | NM_144887    | 0.0305827   | -1.18308 |
| Gdi1          | NM_010273    | 0.0304957   | -1.18312 |
| Ctcf          | NM_007794    | 0.00367569  | -1.18314 |
| Asb2          | NM_023049    | 0.0100628   | -1.18319 |
| Suv420h1      | NM_001167884 | 0.00856199  | -1.18324 |
| 4933439F18Rik | NM_025757    | 0.0160529   | -1.1833  |
| Rtn4rl1       | NM_177708    | 0.00536667  | -1.18345 |
| Mxd4          | NM_010753    | 0.0182588   | -1.18354 |
| Ncbp2         | NM_026554    | 0.0447595   | -1.18378 |
| ---           | ---          | 0.000770747 | -1.18395 |
| Ilkap         | NM_023343    | 0.0247095   | -1.18414 |
| Nedd4         | NM_010890    | 0.0378889   | -1.18432 |
| Prpsap2       | NM_001164242 | 0.00346117  | -1.18435 |
| 5730601F06Rik | NM_001082485 | 0.0278986   | -1.18437 |
| Lcor          | NM_172154    | 0.0262288   | -1.18438 |
| Ccnt1         | NM_009833    | 0.00993769  | -1.18445 |
| C030046I01Rik | NM_177994    | 0.000527302 | -1.18488 |
| Heatr7a       | NM_001162489 | 0.041454    | -1.18525 |
| Daxx          | NM_007829    | 0.0323224   | -1.18541 |
| Fam195a       | NM_026633    | 0.00403018  | -1.18562 |
| Zfp518b       | NM_001081144 | 0.0399113   | -1.18578 |
| Dusp13        | NM_001007268 | 0.0455477   | -1.18578 |
| Lmbrd1        | NM_026719    | 0.037479    | -1.18579 |
| Sbf2          | NM_177324    | 0.001798    | -1.18583 |
| Kif3c         | NM_008445    | 0.0126478   | -1.18611 |
| Ints3         | NM_145540    | 0.012149    | -1.1865  |
| Ano6          | NM_175344    | 0.00989537  | -1.18661 |
| Sap130        | NM_172965    | 0.0187358   | -1.18676 |
| Sdf4          | NM_011341    | 0.0162601   | -1.18698 |
| Etv3          | NM_001083318 | 0.0397734   | -1.18715 |
| Rnasen        | NM_001130149 | 0.0351742   | -1.18736 |
| Eif4e3        | NM_025829    | 0.0101581   | -1.18764 |
| Ergic3        | NM_025516    | 0.0278985   | -1.18787 |
| Gpr107        | NM_178760    | 0.0425297   | -1.18787 |
| Cep76         | NM_001081073 | 0.00721226  | -1.18789 |
| Tmem129       | NM_026698    | 0.0108276   | -1.18795 |
| Loh12cr1      | NM_001170479 | 0.0364142   | -1.188   |

|               |              |             |          |
|---------------|--------------|-------------|----------|
| Slc31a1       | NM_175090    | 0.0253802   | -1.188   |
| Psen1         | NM_008943    | 0.00668312  | -1.18827 |
| Elov15        | NM_134255    | 0.0311445   | -1.18837 |
| Arhgef12      | NM_027144    | 0.0276757   | -1.18849 |
| Arhgap6       | NM_009707    | 0.0205239   | -1.18849 |
| Whsc111       | NM_001001735 | 0.0444852   | -1.18883 |
| Hdgf          | NM_008231    | 0.039778    | -1.18891 |
| Ndufa8        | NM_026703    | 0.010467    | -1.18908 |
| Arnt          | NM_001037737 | 0.0339047   | -1.18911 |
| Slc38a9       | NM_178746    | 0.024781    | -1.18921 |
| Dhodh         | NM_020046    | 0.0342157   | -1.18925 |
| Synj1         | NM_001045515 | 0.00989728  | -1.1894  |
| Stk24         | NM_145465    | 0.0148848   | -1.1896  |
| LOC100048559  | NM_001078167 | 0.0147696   | -1.18971 |
| Kcnk6         | NM_001033525 | 0.00209692  | -1.18975 |
| Idh1          | NM_001111320 | 0.0156872   | -1.19003 |
| Zswim4        | NM_172503    | 0.0376006   | -1.19007 |
| Zfp592        | NM_178707    | 0.0347041   | -1.19035 |
| Tbl1x         | NM_020601    | 0.0236263   | -1.19037 |
| Rhbdd3        | NM_177370    | 0.000938631 | -1.19043 |
| Adck4         | NM_133770    | 0.0135553   | -1.19048 |
| Cnot6l        | NM_144910    | 0.00029833  | -1.19078 |
| Cdk6          | NM_009873    | 0.0402814   | -1.19108 |
| Dido1         | NM_011805    | 0.0419315   | -1.1914  |
| Lrba          | NM_001077687 | 0.0216569   | -1.1915  |
| D630042P16Rik | NM_175525    | 0.022577    | -1.19165 |
| Zfp516        | NM_001177464 | 0.0174081   | -1.19166 |
| Mtap          | NM_024433    | 0.020076    | -1.19169 |
| Gefc1         | NM_026110    | 0.0390425   | -1.19195 |
| Abhd14a       | NM_001110271 | 0.000237923 | -1.19209 |
| Rbm5          | NM_148930    | 0.0305442   | -1.1921  |
| Pdia5         | NM_028295    | 0.016358    | -1.1921  |
| Sod2          | NM_013671    | 0.014699    | -1.19229 |
| Pum2          | NM_001160219 | 0.0355723   | -1.19235 |
| Aph1a         | NM_146104    | 0.00723301  | -1.19241 |
| Zcche11       | NM_175472    | 0.047195    | -1.1926  |
| Eif4g2        | NM_001040131 | 0.00747725  | -1.19265 |
| 4-Sep         | NM_011129    | 0.0154963   | -1.19281 |
| Lifr          | NM_001113386 | 0.0257373   | -1.19294 |
| Trim28        | NM_011588    | 0.0468969   | -1.19297 |
| Acs11         | NM_007981    | 0.00655026  | -1.193   |
| Gm3223        | NM_010948    | 0.0387962   | -1.19311 |

|               |              |            |          |
|---------------|--------------|------------|----------|
| Pick1         | NM_001045558 | 0.015972   | -1.19319 |
| Mllt6         | NM_139311    | 0.0451435  | -1.19324 |
| Il16          | NM_010551    | 0.0499755  | -1.19373 |
| Phf15         | NM_199299    | 0.0473686  | -1.19384 |
| Miip          | NM_001025365 | 0.0172275  | -1.19396 |
| Fam173b       | NM_026546    | 0.0184113  | -1.19399 |
| Tlr3          | NM_126166    | 0.0451632  | -1.19411 |
| Aco2          | NM_080633    | 0.0143267  | -1.19417 |
| Acot6         | NM_172580    | 0.0230779  | -1.19434 |
| Msi2          | NM_054043    | 0.00278635 | -1.19444 |
| Thap4         | NM_025920    | 0.043218   | -1.19444 |
| Shroom3       | NM_001077595 | 0.0323948  | -1.19448 |
| Prickle1      | NM_001033217 | 0.0441234  | -1.19454 |
| 0610031J06Rik | NM_020003    | 0.00833027 | -1.19458 |
| Pcnx          | NM_018814    | 0.0253278  | -1.19474 |
| LOC100047619  | NM_011404    | 0.0281146  | -1.19498 |
| Ptprk         | NM_008983    | 0.0128728  | -1.19507 |
| 8430401P03Rik | ---          | 0.00211817 | -1.19507 |
| Polrmt        | NM_172551    | 0.0194125  | -1.19509 |
| Huwl          | NM_021523    | 0.0153888  | -1.19517 |
| AI839979      | ---          | 0.0313753  | -1.19519 |
| Phf7          | NM_027949    | 0.00977038 | -1.19537 |
| Dennd4a       | NM_001162917 | 0.0384883  | -1.1955  |
| Nr1h3         | NM_001177730 | 0.0292245  | -1.19574 |
| Arl5b         | NM_029466    | 0.00532706 | -1.19631 |
| Tppp3         | NM_026481    | 0.0131312  | -1.19653 |
| Smer71        | NM_178719    | 0.0202326  | -1.19654 |
| 2400001E08Rik | NM_025605    | 0.0272626  | -1.19659 |
| Gpr108        | NM_030084    | 0.0037913  | -1.19681 |
| Tha1          | NM_027919    | 0.0435072  | -1.1969  |
| Ranbp10       | NM_145824    | 0.00745517 | -1.19702 |
| Rngtt         | NM_011884    | 0.0187203  | -1.19708 |
| Pitpnc1       | NM_145823    | 0.0359069  | -1.19756 |
| Phyh          | NM_010726    | 0.0120869  | -1.19764 |
| Vcp           | NM_009503    | 0.0287897  | -1.19781 |
| Rdh14         | NM_023697    | 0.0131884  | -1.19788 |
| Flot1         | NM_008027    | 0.0428572  | -1.19801 |
| ---           | ---          | 0.0155483  | -1.19806 |
| Ywhab         | NM_018753    | 0.0110988  | -1.19813 |
| Hdac5         | NM_001077696 | 0.0441942  | -1.19817 |
| Ivns1abp      | NM_001039511 | 0.00407212 | -1.19837 |
| Gart          | NM_010256    | 0.00586691 | -1.19849 |

|               |              |             |          |
|---------------|--------------|-------------|----------|
| Faf1          | NM_007983    | 0.049087    | -1.19868 |
| Ankrd29       | XM_001474217 | 0.0403511   | -1.19878 |
| Nosip         | NM_001163684 | 0.0109817   | -1.19885 |
| Tbc1d16       | NM_172443    | 0.0124042   | -1.19895 |
| Usp15         | NM_027604    | 0.0281814   | -1.19909 |
| Txnl4a        | NM_001038608 | 0.00689883  | -1.19936 |
| Ptp4a1        | NM_011200    | 0.0348837   | -1.19945 |
| Detn1         | NM_007835    | 0.00665127  | -1.19956 |
| Ccdc111       | NM_001001184 | 0.0122217   | -1.19959 |
| ---           | ---          | 0.0238537   | -1.1996  |
| Arhgap10      | NM_030113    | 0.040018    | -1.19962 |
| Papss2        | NM_011864    | 0.00605121  | -1.19963 |
| Gss           | NM_008180    | 0.0415276   | -1.19969 |
| Glo1          | NM_001113560 | 0.0459771   | -1.19972 |
| Pde1b         | NM_008800    | 0.0219237   | -1.19977 |
| Gnpda1        | NM_011937    | 0.023044    | -1.1999  |
| Ghdc          | NM_031871    | 0.0460454   | -1.20049 |
| BC004004      | NM_030561    | 0.0150664   | -1.20058 |
| Wdr77         | NM_027432    | 0.0322341   | -1.20058 |
| Cnnm3         | NM_001039551 | 0.00768846  | -1.20061 |
| Ddr1          | NM_007584    | 0.0338868   | -1.20063 |
| Med13l        | NM_172424    | 0.0361372   | -1.20079 |
| Mkl2          | NM_001122667 | 0.000673234 | -1.2008  |
| Hcfc1         | NM_008224    | 0.02967     | -1.20083 |
| Acaa1a        | NM_130864    | 0.0166432   | -1.20083 |
| Cep350        | NM_001039184 | 0.00302449  | -1.2012  |
| Vav2          | NM_009500    | 0.0408464   | -1.20135 |
| Ppp1r14c      | NM_133485    | 0.0361109   | -1.20143 |
| ---           | ---          | 0.0399388   | -1.20152 |
| Zfp414        | NM_026712    | 0.0143093   | -1.20173 |
| Mapre2        | NM_001162941 | 0.0183085   | -1.20178 |
| Amigo1        | NM_001004293 | 0.0372945   | -1.20189 |
| 4632404H12Rik | NM_028726    | 0.00077626  | -1.2025  |
| Alox12        | NM_007440    | 0.0493528   | -1.20267 |
| Wipf3         | NM_001167860 | 0.0197563   | -1.20283 |
| Inpp5d        | NM_001110192 | 0.0182566   | -1.20292 |
| Hars2         | NM_080636    | 0.0143317   | -1.20294 |
| Erbp3         | NM_010153    | 0.0324687   | -1.20311 |
| Dync1li2      | NM_001013380 | 0.0335966   | -1.20318 |
| Aff1          | NM_001080798 | 0.0435604   | -1.20331 |
| Clen4-2       | NM_011334    | 0.0277474   | -1.20341 |
| Yy1           | NM_009537    | 0.0149482   | -1.20347 |

|               |              |            |          |
|---------------|--------------|------------|----------|
| Foxj3         | NM_172699    | 0.013438   | -1.2036  |
| Nrbp1         | NM_147201    | 0.00223495 | -1.20361 |
| Usp19         | NM_001168371 | 0.00855441 | -1.20375 |
| 1600014C10Rik | NM_001085385 | 0.018671   | -1.20381 |
| Zdhhc14       | NM_146073    | 0.024393   | -1.20399 |
| Ankmy2        | NM_146033    | 0.0150693  | -1.20433 |
| Arfgef2       | NM_001085495 | 0.0288925  | -1.20445 |
| 4933403F05Rik | NM_153794    | 0.0184753  | -1.20477 |
| Arl2bp        | NM_024191    | 0.00940238 | -1.20485 |
| Ptdss2        | NM_013782    | 0.0288275  | -1.20498 |
| Rexo4         | NM_207234    | 0.0341924  | -1.20523 |
| Nup98         | NM_022979    | 0.0241434  | -1.20545 |
| Prpf6         | NM_133701    | 0.0208995  | -1.20573 |
| Rpn2          | NM_019642    | 0.0100477  | -1.20578 |
| Irak1         | NM_001177973 | 0.0250856  | -1.20578 |
| Fnbp1         | NM_001038700 | 0.0487774  | -1.2058  |
| Rbm4b         | NM_025717    | 0.0408653  | -1.20606 |
| Stard5        | NM_023377    | 0.0188021  | -1.2062  |
| Ank           | NM_020332    | 0.0210436  | -1.20627 |
| Extl1         | NM_019578    | 0.0025543  | -1.20645 |
| Nat6          | NM_019750    | 0.0044605  | -1.20661 |
| 5430437P03Rik | NM_026636    | 0.00415883 | -1.20663 |
| Inpp5k        | NM_008916    | 0.0286544  | -1.2068  |
| Slc9a1        | NM_016981    | 0.0342036  | -1.20681 |
| Sec24c        | NM_001168273 | 0.019539   | -1.20682 |
| Taz           | NM_001173547 | 0.0178085  | -1.20688 |
| Ano6          | NM_175344    | 0.0293692  | -1.20705 |
| Dpp9          | NM_172624    | 0.00824816 | -1.20708 |
| Ppt2          | NM_019441    | 0.0221467  | -1.20711 |
| Ccdc117       | NM_134033    | 0.00583899 | -1.20718 |
| 1110007C09Rik | NM_026738    | 0.0301213  | -1.20727 |
| Hipk2         | NM_001136065 | 0.0121065  | -1.20734 |
| Ino80         | NM_026574    | 0.015114   | -1.20753 |
| 1110021L09Rik | NM_183116    | 0.00930873 | -1.20771 |
| Tbl2          | NM_013763    | 0.0371991  | -1.20789 |
| Zfp9          | NM_011763    | 0.0212943  | -1.20795 |
| Rrp7a         | NM_029101    | 0.0288376  | -1.20801 |
| Cnot3         | NM_146176    | 0.0427432  | -1.20803 |
| Mks1          | NM_001039684 | 0.0474001  | -1.20817 |
| Lpin3         | NM_022883    | 0.0208507  | -1.20824 |
| 6230424C14Rik | ---          | 0.0334347  | -1.20827 |
| Cnot6l        | NM_144910    | 0.0147162  | -1.20857 |

|               |              |             |          |
|---------------|--------------|-------------|----------|
| Ezr           | NM_009510    | 0.024083    | -1.20864 |
| Gstm4         | NM_001160411 | 0.0130851   | -1.2091  |
| Unc45b        | NM_178680    | 0.00950097  | -1.20922 |
| Reep5         | NM_007874    | 0.024007    | -1.20955 |
| LOC100048058  | NM_146257    | 0.0459641   | -1.20965 |
| Epb4.114a     | NM_013512    | 0.0366987   | -1.20967 |
| Jph2          | NM_021566    | 0.032217    | -1.20993 |
| Inpp5e        | NM_033134    | 0.0076016   | -1.21002 |
| 1810014B01Rik | NR_015572    | 0.0315971   | -1.21012 |
| Mll1          | NM_001081049 | 0.0265126   | -1.21016 |
| Glt25d2       | NM_177756    | 0.0380589   | -1.21025 |
| Exoc8         | NM_198103    | 0.0401447   | -1.21031 |
| Txn2          | NM_019913    | 0.0267198   | -1.21042 |
| Ewsr1         | NM_007968    | 0.0479245   | -1.21064 |
| Sertad3       | NM_133210    | 0.0113046   | -1.21076 |
| LOC497255     | ---          | 0.0127531   | -1.21081 |
| Wfdc1         | NM_023395    | 0.00884961  | -1.21088 |
| Slc11a2       | NM_001146161 | 0.0497936   | -1.21101 |
| Utrn          | NM_011682    | 0.00753     | -1.21116 |
| Mlxip         | NM_133917    | 0.0356377   | -1.21124 |
| C230098O21Rik | ---          | 0.0251522   | -1.21142 |
| Cbara1        | NM_144822    | 0.00187964  | -1.2115  |
| Gpd2          | NM_001145820 | 0.02797     | -1.21176 |
| Ube2n         | NM_080560    | 0.0207823   | -1.21185 |
| 1110037F02Rik | NM_001081183 | 0.000292413 | -1.21198 |
| Ak2           | NM_001033966 | 0.0228672   | -1.21214 |
| Cdc37         | NM_016742    | 0.0206576   | -1.21222 |
| Spns1         | NM_023712    | 0.0098768   | -1.21229 |
| Bms1          | NM_194339    | 0.00127437  | -1.21231 |
| Cnn2          | NM_007725    | 0.0226946   | -1.21236 |
| Efr3a         | NM_133766    | 0.0203163   | -1.21244 |
| Rcor1         | NM_198023    | 0.0251074   | -1.21257 |
| Dgcr6         | NM_010047    | 0.034692    | -1.21262 |
| Sfrs13a       | NM_001080387 | 0.00925463  | -1.21281 |
| Ccdc53        | NM_001122960 | 0.0253307   | -1.21307 |
| ---           | ---          | 0.00573658  | -1.21318 |
| Srgap2        | NM_001081011 | 0.0174963   | -1.21321 |
| Tnrc6b        | NM_144812    | 0.0216317   | -1.21331 |
| Nup214        | NM_172268    | 0.0128039   | -1.21338 |
| Irf2bp1       | NM_178757    | 0.0303944   | -1.21354 |
| Csrp2bp       | NM_001166640 | 0.00507576  | -1.21379 |
| Bcl7b         | NM_009745    | 0.0314732   | -1.21426 |



|               |              |             |          |
|---------------|--------------|-------------|----------|
| Abhd14b       | NM_029631    | 0.018083    | -1.21456 |
| Mcart1        | NM_001009949 | 0.00258945  | -1.21501 |
| Gpatch1       | NM_026181    | 0.00947258  | -1.21503 |
| Tmem181a      | NM_001033178 | 0.0250595   | -1.21515 |
| Nr3c1         | NM_008173    | 0.000177748 | -1.21539 |
| ---           | ---          | 0.0215531   | -1.21575 |
| Prep          | NM_011156    | 0.0377396   | -1.21579 |
| Hdac4         | NM_207225    | 0.0441883   | -1.21621 |
| Eif1          | NM_011508    | 0.0101495   | -1.21622 |
| Vps26b        | NM_178027    | 0.0320142   | -1.21634 |
| Rasgrp2       | NM_011242    | 0.0268509   | -1.21642 |
| ---           | ---          | 0.00888768  | -1.21679 |
| Tmcc1         | NM_177412    | 0.043939    | -1.21683 |
| Zfp317        | NM_172918    | 0.0472659   | -1.21683 |
| Ap3m2         | NM_001122820 | 0.0281266   | -1.21685 |
| Etv6          | NM_007961    | 0.0164318   | -1.21734 |
| Ftsjd2        | NM_028791    | 0.000667901 | -1.21741 |
| Sft2d2        | NM_145512    | 0.00959718  | -1.21745 |
| Klf3          | NM_008453    | 0.0412405   | -1.21757 |
| BC030336      | NM_001164580 | 0.0472271   | -1.2176  |
| 2210408K08Rik | ---          | 0.0313761   | -1.21815 |
| Lphn1         | NM_181039    | 0.00163799  | -1.21825 |
| Nf1           | NM_010897    | 0.00243114  | -1.21848 |
| Unc13b        | NM_001081413 | 0.00829456  | -1.21874 |
| Hdgfrp2       | NM_008233    | 0.0242689   | -1.21876 |
| Zmym5         | NM_144842    | 0.0258471   | -1.21918 |
| Rtp3          | NM_153100    | 0.0367487   | -1.21942 |
| Prkaca        | NM_008854    | 0.00459406  | -1.21947 |
| Myadm         | NM_001093764 | 0.0473729   | -1.21951 |
| Flad1         | NM_020517    | 0.00453434  | -1.2197  |
| 5930434B04Rik | NM_029862    | 0.0285434   | -1.21983 |
| 4933426M11Rik | NM_178682    | 0.0137488   | -1.22019 |
| Klf16         | NM_078477    | 0.0111833   | -1.22027 |
| Exoc4         | NM_009148    | 0.02582     | -1.2203  |
| Neur12        | NM_001082974 | 0.00668406  | -1.22048 |
| 2310001A20Rik | NM_027977    | 0.0183611   | -1.22048 |
| Aplp2         | NM_001102455 | 0.0488143   | -1.22101 |
| Ncoa2         | NM_001077695 | 0.0243954   | -1.2213  |
| Smug1         | NM_027885    | 0.000346504 | -1.22133 |
| Mif4gd        | NM_027162    | 0.00351311  | -1.22149 |
| Asph          | NM_001177849 | 0.0376148   | -1.22163 |
| C230081A13Rik | NM_172924    | 0.0015302   | -1.22169 |

|               |              |             |          |
|---------------|--------------|-------------|----------|
| Poldip3       | NM_178627    | 0.0121192   | -1.2218  |
| Lama5         | NM_001081171 | 0.0422206   | -1.22187 |
| LOC319460     | ---          | 0.00524641  | -1.22193 |
| 2310035K24Rik | NM_027129    | 0.0398362   | -1.22197 |
| Thap4         | NM_025920    | 0.00555327  | -1.22205 |
| Arhgef5       | NM_133674    | 0.0226369   | -1.22237 |
| Ppil2         | NM_144954    | 0.0418347   | -1.2225  |
| Cpt2          | NM_009949    | 0.0417214   | -1.22255 |
| Itfg2         | NM_133927    | 0.0409546   | -1.22258 |
| Atp2a3        | NM_001163336 | 0.0367174   | -1.22271 |
| Crebbp        | NM_001025432 | 0.0185169   | -1.2228  |
| Tfdp2         | NM_001184706 | 0.00997307  | -1.22335 |
| Eno3          | NM_001136062 | 0.0194736   | -1.22343 |
| Cdk13         | NM_001081058 | 0.0455861   | -1.22354 |
| Epn2          | NM_010148    | 0.00410609  | -1.22365 |
| Pctp          | NM_008796    | 0.0142665   | -1.22398 |
| Pigq          | NM_011822    | 0.00576286  | -1.22416 |
| Nucb1         | NM_001163662 | 0.0359784   | -1.22427 |
| Adam17        | NM_009615    | 0.00529264  | -1.22434 |
| Erlec1        | NM_025745    | 0.00187817  | -1.22447 |
| Hp1bp3        | NM_001122896 | 0.0033921   | -1.22459 |
| Fam132a       | NM_026125    | 0.0117065   | -1.22466 |
| Acot2         | NM_134188    | 0.0144947   | -1.22485 |
| Actb          | NM_007393    | 0.0201777   | -1.225   |
| Ttf1          | NM_009442    | 0.0248203   | -1.22513 |
| Cog3          | NM_177381    | 0.01928     | -1.22521 |
| Mast2         | NM_001042743 | 0.0265245   | -1.22543 |
| Hivep2        | NM_010437    | 0.00339747  | -1.22548 |
| Mfge8         | NM_001045489 | 0.0422987   | -1.22568 |
| Nhsl2         | NM_001163610 | 0.0375115   | -1.22593 |
| Ccdc117       | NM_134033    | 0.000226049 | -1.22594 |
| Frmd4a        | NM_001177843 | 0.0275662   | -1.22602 |
| Gfod1         | NM_001033399 | 0.00379024  | -1.22607 |
| Trip6         | NM_011639    | 0.0133987   | -1.22611 |
| Map3k4        | NM_011948    | 0.0103707   | -1.22612 |
| Sdccag3       | NM_001085407 | 0.0138317   | -1.22657 |
| Rsph9         | NM_029338    | 0.0110874   | -1.22664 |
| Syng2         | NM_009304    | 0.0376402   | -1.22675 |
| Atg9a         | NM_001003917 | 0.0327435   | -1.22698 |
| Atp1b2        | NM_013415    | 0.043485    | -1.22699 |
| Ric8b         | NM_001013441 | 0.0167253   | -1.22702 |
| C4bp-ps1      | NR_028304    | 0.0489033   | -1.22724 |

|               |              |             |          |
|---------------|--------------|-------------|----------|
| Ptprd         | NM_001014288 | 0.00252047  | -1.22728 |
| Top3b         | NM_011624    | 0.0359823   | -1.22729 |
| Pfkm          | NM_001163487 | 0.0167431   | -1.22737 |
| Fgd4          | NM_139232    | 0.0357886   | -1.22743 |
| Dnaja3        | NM_001135112 | 0.00674396  | -1.2275  |
| Itpr1         | NM_010585    | 0.000286239 | -1.22755 |
| Rhbdl3        | NM_139228    | 0.0399061   | -1.22758 |
| Cabc1         | NM_001163290 | 0.032133    | -1.22759 |
| Fads1         | NM_146094    | 0.0321339   | -1.22761 |
| Mapk6         | NM_015806    | 0.00247534  | -1.22783 |
| Gp1bb         | NM_001001999 | 0.0473373   | -1.22792 |
| Tollip        | NM_023764    | 0.0123519   | -1.22806 |
| Snx5          | NM_024225    | 0.0213881   | -1.22831 |
| Nt5dc2        | NM_027289    | 0.0403373   | -1.22835 |
| Fadd          | NM_010175    | 0.0160618   | -1.22843 |
| Sh3pxd2a      | NM_001164717 | 0.0424818   | -1.22846 |
| St3gal6       | NM_018784    | 0.0220138   | -1.22846 |
| Prkab1        | NM_031869    | 0.0486771   | -1.2285  |
| Txlnb         | NM_138628    | 0.0202572   | -1.22852 |
| ---           | ---          | 0.0482795   | -1.22858 |
| Kcnq2         | NM_001003824 | 0.0153489   | -1.22866 |
| Jmjd8         | NM_028101    | 0.00360745  | -1.22878 |
| P4htm         | NM_028944    | 0.0273173   | -1.22889 |
| Abca1         | NM_013454    | 0.00733922  | -1.22909 |
| Epc1          | NM_007935    | 0.00976841  | -1.22916 |
| Zfp28         | NM_175247    | 0.043672    | -1.22924 |
| Ankmy2        | NM_146033    | 0.0220666   | -1.22928 |
| Ctage5        | NM_001165253 | 0.00723641  | -1.22933 |
| ---           | ---          | 0.00545483  | -1.22937 |
| Pnpla7        | NM_146251    | 0.0362964   | -1.22947 |
| Ddx5          | NM_007840    | 0.0219535   | -1.22955 |
| Fzd6          | NM_001162494 | 0.0379099   | -1.23018 |
| C1qtnf2       | NM_026979    | 0.0389962   | -1.23023 |
| Ahcyl2        | NM_001171000 | 0.0115525   | -1.23025 |
| Hfe2          | NM_027126    | 0.0498598   | -1.23037 |
| Fam178a       | NM_001081225 | 0.0148558   | -1.23037 |
| Gatad2b       | NM_139304    | 0.0306935   | -1.23044 |
| Bahcc1        | NM_198423    | 0.0146826   | -1.23064 |
| 4930430F08Rik | NM_175128    | 0.0231392   | -1.23072 |
| Zmynd8        | NM_027230    | 0.0242454   | -1.23098 |
| Mpv17         | NM_008622    | 0.0160319   | -1.23103 |
| Atp6v0a2      | NM_011596    | 0.0180383   | -1.23103 |

|               |              |             |          |
|---------------|--------------|-------------|----------|
| Sf3b2         | NM_030109    | 0.0387232   | -1.2312  |
| Adat3         | NM_001100606 | 0.0441462   | -1.23121 |
| Cramp11       | NM_020608    | 0.0136471   | -1.23122 |
| Poldip3       | NM_178627    | 0.0344587   | -1.23128 |
| LOC100047839  | NM_001164729 | 0.0192018   | -1.23132 |
| Pigu          | NM_001004721 | 0.00208143  | -1.23135 |
| Gramd1b       | NM_172768    | 0.0156172   | -1.23138 |
| Terf2         | NM_001083118 | 0.0181482   | -1.23169 |
| Hmgb3         | NM_008253    | 0.0380497   | -1.23189 |
| Mlycd         | NM_019966    | 0.0345353   | -1.23208 |
| Rpusd3        | NM_001033204 | 0.018024    | -1.23209 |
| Macf1         | NM_009600    | 0.0114204   | -1.2322  |
| Rabgef1       | NM_019983    | 0.0122959   | -1.23238 |
| Abcc5         | NM_013790    | 0.00142657  | -1.23259 |
| Bcl7a         | NM_029850    | 0.00524001  | -1.23302 |
| Eif2c1        | NM_153403    | 0.00852128  | -1.23309 |
| Klf9          | NM_010638    | 0.0159204   | -1.23312 |
| 2310079F09Rik | ---          | 0.0435883   | -1.23323 |
| Zbtb5         | NM_001163283 | 0.042602    | -1.23331 |
| Ap1b1         | NM_007454    | 0.00761998  | -1.23342 |
| Sirt3         | NM_001127351 | 0.0346908   | -1.23344 |
| Hfe2          | NM_027126    | 0.0392924   | -1.23378 |
| Prdm11        | NM_001177536 | 0.0233675   | -1.23381 |
| Ccr6          | NM_009835    | 0.0462944   | -1.23393 |
| ---           | ---          | 0.0204955   | -1.23395 |
| Mrto4         | NM_023536    | 0.00257914  | -1.23425 |
| Pde2a         | NM_001008548 | 0.00650372  | -1.23429 |
| Lama4         | NM_010681    | 0.000396403 | -1.23434 |
| 0610009L18Rik | ---          | 0.00351643  | -1.23441 |
| Parm1         | NM_145562    | 0.0362572   | -1.23455 |
| Rab7          | NM_009005    | 0.00561028  | -1.23529 |
| Rnf217        | NM_001146349 | 0.0312547   | -1.23589 |
| Plec          | NM_001163540 | 0.0487588   | -1.23618 |
| Pofut1        | NM_001039055 | 0.0340715   | -1.23619 |
| Cpsf2         | NM_016856    | 0.00618789  | -1.23644 |
| Rab35         | NM_198163    | 0.0383936   | -1.23663 |
| Itpr1         | NM_010585    | 0.0129301   | -1.23678 |
| ---           | ---          | 0.0476712   | -1.23678 |
| Larp4b        | NM_172585    | 0.0312586   | -1.23691 |
| Camk2d        | NM_001025438 | 0.0441837   | -1.23715 |
| Poldip3       | NM_178627    | 0.029144    | -1.23717 |
| 1810006K21Rik | NM_001163431 | 0.0114411   | -1.23723 |

|               |              |             |          |
|---------------|--------------|-------------|----------|
| Qk            | NM_001159516 | 0.00838027  | -1.23724 |
| Surf4         | NM_011512    | 0.0146774   | -1.23732 |
| Nbeal1        | NM_173444    | 0.000816555 | -1.23735 |
| Crybg3        | NM_174848    | 0.0128838   | -1.2374  |
| Rtn4r         | NM_022982    | 0.0232229   | -1.23752 |
| Arfgef1       | NM_001102430 | 0.0264231   | -1.23768 |
| Rnf144a       | NM_001081977 | 0.027387    | -1.23772 |
| Acad10        | NM_028037    | 0.0347551   | -1.2379  |
| Abcc4         | NM_001033336 | 0.0154801   | -1.23809 |
| Klhl22        | NM_145479    | 0.00504     | -1.23835 |
| Cmah          | NM_001111110 | 0.0169618   | -1.23835 |
| ---           | ---          | 0.0181814   | -1.23842 |
| Polr1a        | NM_009088    | 0.0186621   | -1.23867 |
| Nipal3        | NM_028995    | 0.0381723   | -1.23896 |
| Tbc1d2b       | NM_194334    | 0.0422314   | -1.23926 |
| Capns1        | NM_009795    | 0.0140484   | -1.23935 |
| Ddx19a        | NM_007916    | 0.0456529   | -1.23937 |
| Mlh3          | NM_175337    | 0.0164731   | -1.23944 |
| Opa3          | NM_207525    | 0.0210367   | -1.23956 |
| Cpsf4         | NM_178576    | 0.0401972   | -1.23975 |
| Tnrc6c        | NM_198022    | 0.0283853   | -1.23995 |
| Helz          | NM_198298    | 0.0037915   | -1.23996 |
| Tfpi          | NM_001177319 | 0.0429657   | -1.24002 |
| 9030420J04Rik | NM_027823    | 0.0133775   | -1.24031 |
| Ndst1         | NM_008306    | 0.0145063   | -1.24034 |
| Nude          | NM_010948    | 0.00659419  | -1.24038 |
| Flcn          | NM_146018    | 0.0320664   | -1.24048 |
| Ctnnd1        | NM_001085448 | 0.0329653   | -1.24049 |
| Exoc4         | NM_009148    | 0.00667324  | -1.24057 |
| Ctdsp2        | NM_001113470 | 0.0323633   | -1.24059 |
| Cox7a1        | NM_009944    | 0.00181434  | -1.24083 |
| Insc          | NM_173767    | 0.0277406   | -1.24109 |
| Fbxo7         | NM_153195    | 0.0232921   | -1.24121 |
| Myo18a        | NM_011586    | 0.0481635   | -1.2413  |
| B9d2          | NM_172148    | 0.0103096   | -1.24149 |
| 1810049H13Rik | NM_025560    | 0.0254905   | -1.24152 |
| Smtn          | NM_001159284 | 0.0447971   | -1.24171 |
| AA536887      | ---          | 0.0140971   | -1.24173 |
| Btrc          | NM_001037758 | 0.022422    | -1.24188 |
| Sel1l         | NM_001039089 | 0.00875071  | -1.24219 |
| 5730419I09Rik | NM_001109688 | 0.00536186  | -1.2422  |
| Aph1b         | NM_177583    | 0.00928595  | -1.24246 |

|               |              |             |          |
|---------------|--------------|-------------|----------|
| Rnf38         | NM_001038993 | 0.0271842   | -1.24296 |
| N4bp1         | NM_030563    | 0.0428093   | -1.24309 |
| Slc24a6       | NM_001177594 | 0.0319425   | -1.24327 |
| Sfmbt1        | NM_001166531 | 0.00850926  | -1.24361 |
| Ndufs2        | NM_153064    | 0.00306424  | -1.24366 |
| Slc25a29      | NM_181328    | 0.0474682   | -1.24366 |
| Rbm19         | NM_028762    | 0.0270752   | -1.2437  |
| Gna13         | NM_010303    | 0.0482021   | -1.24402 |
| Nckipsd       | NM_030729    | 0.0226023   | -1.24422 |
| Fadd          | NM_010175    | 0.0127152   | -1.24426 |
| Igh-6         | ---          | 0.00846918  | -1.24432 |
| Scarb2        | NM_007644    | 0.0108062   | -1.24449 |
| Rps6kb2       | NM_021485    | 0.026279    | -1.24456 |
| Pold3         | NM_133692    | 0.0403296   | -1.24462 |
| Ptdss2        | NM_013782    | 0.00647005  | -1.24475 |
| Gm9780        | NM_207229    | 0.00483133  | -1.24485 |
| Plcg1         | NM_021280    | 0.0274447   | -1.24496 |
| Gm12824       | NM_001085549 | 0.0122629   | -1.24499 |
| Tapbp1        | NM_145391    | 0.0228222   | -1.24515 |
| Ddb1          | NM_015735    | 0.0397987   | -1.24519 |
| Klc4          | NM_029091    | 0.0115536   | -1.24534 |
| Sh3bp4        | NM_133816    | 0.0156608   | -1.2454  |
| B3galt1       | NM_001081204 | 0.0111751   | -1.24547 |
| Vps13a        | NM_173028    | 0.0360807   | -1.24571 |
| Mrm1          | NM_145433    | 0.0274327   | -1.24628 |
| 1190003J15Rik | NM_029821    | 0.030037    | -1.24655 |
| Eif4b         | NM_145625    | 0.00102817  | -1.24665 |
| Hyou1         | NM_021395    | 0.0420483   | -1.24671 |
| Pkn1          | NM_013641    | 0.001956    | -1.24686 |
| Git2          | NM_001077359 | 0.00912314  | -1.24698 |
| Ick           | NM_001163780 | 0.024843    | -1.247   |
| Znf512b       | NM_001164597 | 0.001028    | -1.24717 |
| Fam117a       | NM_172543    | 0.0212633   | -1.24718 |
| Ywhaz         | NM_011740    | 0.00133804  | -1.24724 |
| Arf1          | NM_001130408 | 0.0345132   | -1.24729 |
| Ddo           | NM_027442    | 0.0128616   | -1.2474  |
| ---           | ---          | 0.0443771   | -1.24745 |
| Dock5         | NM_177780    | 0.000487651 | -1.24746 |
| Slc47a1       | NM_026183    | 0.0161207   | -1.24749 |
| Cldnd1        | NM_171826    | 0.0237594   | -1.24765 |
| Got2          | NM_010325    | 0.0154643   | -1.24775 |
| Sh3rf2        | NM_001146299 | 0.0486088   | -1.24781 |

|               |              |             |          |
|---------------|--------------|-------------|----------|
| Rcc1          | NM_133878    | 0.00172121  | -1.24784 |
| Phb2          | NM_007531    | 0.000975536 | -1.24791 |
| LOC100048050  | NM_001081298 | 0.00870216  | -1.24795 |
| Igsf3         | NM_207205    | 0.0311415   | -1.2483  |
| ---           | ---          | 0.0134182   | -1.24842 |
| 2810427A07Rik | ---          | 0.0315043   | -1.24868 |
| Peo1          | NM_153796    | 0.0149746   | -1.2488  |
| Amotl1        | NM_001081395 | 0.00991298  | -1.24899 |
| Purb          | NM_011221    | 0.0328902   | -1.24899 |
| Slc9a8        | NM_148929    | 0.0453635   | -1.24899 |
| Pik3r6        | NM_001004435 | 0.00115158  | -1.24911 |
| Srprb         | NM_009275    | 0.00892565  | -1.24912 |
| Acs11         | NM_007981    | 0.0367649   | -1.24994 |
| Klhdc9        | NM_001033039 | 0.0234007   | -1.24994 |
| Arhgef11      | NM_001003912 | 0.00201003  | -1.25018 |
| Arid1b        | NM_001085355 | 0.0409681   | -1.25022 |
| Ptdss2        | NM_013782    | 0.0075129   | -1.25031 |
| Tmem106c      | NM_201359    | 0.0111594   | -1.25051 |
| Zfp827        | NM_178267    | 0.0240451   | -1.25092 |
| ---           | ---          | 0.0243009   | -1.25101 |
| Pafah2        | NM_133880    | 0.00301916  | -1.25114 |
| Rnf166        | NM_001033142 | 0.00284639  | -1.25115 |
| ---           | ---          | 0.00841575  | -1.2513  |
| Ak3           | NM_021299    | 0.000638005 | -1.25192 |
| BC004004      | NM_030561    | 0.00827053  | -1.25196 |
| Canx          | NM_001110499 | 0.00325448  | -1.25204 |
| Fam53b        | NM_175268    | 0.00203017  | -1.25238 |
| Dcaf11        | NM_133734    | 0.0159857   | -1.25269 |
| Ywhaz         | NM_011740    | 0.0108419   | -1.25271 |
| Golga2        | NM_001080968 | 0.0207437   | -1.2532  |
| Arhgap9       | NM_146011    | 0.0176228   | -1.2533  |
| Sfrs12        | NM_172592    | 0.0124541   | -1.25352 |
| Heyl          | NM_013905    | 0.0372332   | -1.25361 |
| Mpnd          | NM_026530    | 0.0164598   | -1.25379 |
| Cdk16         | NM_011049    | 0.0266045   | -1.25384 |
| Brd3          | NM_001113573 | 0.00691763  | -1.25398 |
| Phc1          | NM_001042623 | 0.0199871   | -1.25403 |
| Ebf1          | NM_007897    | 0.0131172   | -1.25414 |
| Pard3         | NM_001013580 | 0.0193534   | -1.25423 |
| Phf8          | NM_001113354 | 0.0164666   | -1.25423 |
| Mtus1         | NM_001005863 | 0.0311764   | -1.2543  |
| Sdhc          | NM_025321    | 0.0180593   | -1.25432 |

|               |              |             |          |
|---------------|--------------|-------------|----------|
| Csrnp2        | NM_153407    | 0.0193351   | -1.25438 |
| Phf20         | NM_172674    | 0.0192767   | -1.25466 |
| Plbd2         | NM_023625    | 0.00801766  | -1.25478 |
| Tec           | NM_001113460 | 0.00822335  | -1.2548  |
| Adi1          | NM_134052    | 0.0166429   | -1.25493 |
| ---           | ---          | 0.0207163   | -1.25496 |
| Rnf24         | NM_178607    | 0.0113557   | -1.25497 |
| 9130017K11Rik | ---          | 0.0332548   | -1.25499 |
| Ckm           | NM_007710    | 0.0104599   | -1.25522 |
| ---           | ---          | 0.04268     | -1.25535 |
| Edem2         | NM_145537    | 0.000468544 | -1.25544 |
| Gm10307       | NM_153783    | 0.00865884  | -1.25558 |
| Det1          | NM_029585    | 0.0116686   | -1.25567 |
| Ube2l3        | NM_009456    | 0.0086539   | -1.25575 |
| Akap1         | NM_001042541 | 0.0438315   | -1.25585 |
| Syngn2        | NM_009304    | 0.0401567   | -1.25603 |
| Sema5a        | NM_009154    | 0.0285894   | -1.25607 |
| Tspan18       | NM_183180    | 0.0241456   | -1.25612 |
| Ccs           | NM_016892    | 0.0444089   | -1.25623 |
| Nck1          | NM_010878    | 0.00558138  | -1.25626 |
| Rbms2         | NM_001039080 | 0.00133099  | -1.25636 |
| Parp6         | NM_029922    | 0.00119587  | -1.25638 |
| Ebf2          | NM_010095    | 0.0406462   | -1.25659 |
| Phip          | NM_001081216 | 0.0155869   | -1.25671 |
| Slc16a10      | NM_001114332 | 0.0167024   | -1.25673 |
| Ctsf          | NM_019861    | 0.0476329   | -1.25695 |
| Prr12         | NM_175022    | 0.00305313  | -1.25742 |
| Hspa5         | NM_001163434 | 0.0395483   | -1.25767 |
| Frmd6         | NM_028127    | 0.0126762   | -1.25785 |
| Inpp5e        | NM_033134    | 0.00237772  | -1.25799 |
| Ccbl1         | NM_172404    | 0.0481457   | -1.258   |
| Cntrob        | NM_172560    | 0.0124936   | -1.25817 |
| Eif2ak1       | NM_013557    | 0.0357631   | -1.2583  |
| Bnip1         | NM_172149    | 0.0434809   | -1.25849 |
| Elac1         | NM_053255    | 0.0149037   | -1.25849 |
| Ern1          | NM_023913    | 0.038329    | -1.2589  |
| Fam59a        | NM_001033445 | 0.0255973   | -1.25904 |
| Btc           | NM_007568    | 0.00581627  | -1.25924 |
| ---           | ---          | 0.00781531  | -1.25926 |
| Fars2         | NM_001039189 | 0.0301303   | -1.25953 |
| Epc2          | NM_172663    | 0.00992008  | -1.25953 |
| Myst3         | NM_001081149 | 0.00174354  | -1.25964 |



|               |              |             |          |
|---------------|--------------|-------------|----------|
| Klra21        | NM_053151    | 0.0424679   | -1.25968 |
| Cul7          | NM_025611    | 0.00423531  | -1.25977 |
| H2-K1         | NM_001001892 | 0.0325831   | -1.25979 |
| Pdgfrb        | NM_001146268 | 0.0478011   | -1.25988 |
| Arhgap20      | NM_175535    | 0.0255927   | -1.2599  |
| 9830167H18Rik | XM_910524    | 0.0266014   | -1.26003 |
| Dgkz          | NM_001166597 | 0.0235437   | -1.26044 |
| Fance         | NM_001163819 | 0.00167574  | -1.26049 |
| Helz          | NM_198298    | 0.0253379   | -1.26068 |
| Dand5         | NM_201227    | 0.00164548  | -1.26068 |
| Nat15         | NM_029090    | 4.44E-05    | -1.26092 |
| Ubl7          | NM_001122873 | 0.0151605   | -1.26092 |
| Dnajb9        | NM_013760    | 0.00406386  | -1.26094 |
| 9-Sep         | NM_001113486 | 0.0181583   | -1.26094 |
| Pcif1         | NM_146129    | 0.00339029  | -1.26123 |
| BC018507      | NM_144837    | 0.0354456   | -1.26124 |
| Heatr5b       | NM_001081179 | 0.0105959   | -1.26144 |
| Myo1b         | NM_001161817 | 0.00375     | -1.26161 |
| Mtus1         | NM_001005863 | 0.045652    | -1.2618  |
| Mgst3         | NM_025569    | 0.0254058   | -1.26187 |
| Grin1a        | NM_001164793 | 0.0459063   | -1.2619  |
| Gpr155        | NM_001080707 | 0.0456815   | -1.26193 |
| Auh           | NM_016709    | 0.0251668   | -1.26236 |
| Map3k4        | NM_011948    | 0.00360125  | -1.26237 |
| Ncapd2        | NM_146171    | 0.00576096  | -1.26242 |
| Paqr9         | NM_198414    | 0.0320604   | -1.26268 |
| Trip12        | NM_133975    | 0.00676296  | -1.26271 |
| Gm12824       | NM_001085549 | 0.0153475   | -1.2629  |
| Pwwp2b        | NM_001033206 | 0.0294637   | -1.26342 |
| Tcn2          | NM_001130458 | 0.0162756   | -1.26347 |
| Cyhr1         | NM_019396    | 0.0330932   | -1.2635  |
| Tab1          | NM_025609    | 0.00760946  | -1.26356 |
| Plscr4        | NM_178711    | 0.0146142   | -1.26364 |
| Poldip3       | NM_178627    | 0.0285933   | -1.26375 |
| Il28ra        | NM_174851    | 0.0343666   | -1.26383 |
| Dnajc28       | NM_001099738 | 0.0475895   | -1.26398 |
| Adcy9         | NM_009624    | 0.00676469  | -1.26419 |
| Pitpm2        | NM_011256    | 0.0109214   | -1.26438 |
| LOC100047579  | NM_175507    | 0.00761202  | -1.26438 |
| Gigyf2        | NM_001110212 | 0.00151979  | -1.26447 |
| Adamts3       | NM_001081401 | 0.000322604 | -1.26451 |
| ---           | ---          | 0.00144294  | -1.26462 |

|               |              |             |          |
|---------------|--------------|-------------|----------|
| Noc31         | NM_021315    | 0.0107778   | -1.26485 |
| Ppif          | NM_134084    | 0.0147888   | -1.26492 |
| Agpat2        | NM_026212    | 0.0280697   | -1.26516 |
| Eif2c4        | NM_153177    | 0.0219278   | -1.26517 |
| Ptpn3         | NM_011207    | 0.00855763  | -1.26526 |
| Plekho2       | NM_153119    | 0.00806736  | -1.26539 |
| Flot2         | NM_001040403 | 0.0377125   | -1.26557 |
| 3930402G23Rik | NR_030715    | 0.000654315 | -1.26576 |
| Rab11b        | NM_008997    | 0.00703565  | -1.2659  |
| Prkce         | NM_011104    | 0.0327101   | -1.26613 |
| Lamc1         | NM_010683    | 0.00325257  | -1.26646 |
| ---           | ---          | 0.0312054   | -1.26646 |
| Kpna6         | NM_008468    | 4.27E-05    | -1.26656 |
| Gpc4          | NM_008150    | 0.0307554   | -1.26674 |
| Mbtd1         | NM_134012    | 0.0109543   | -1.26687 |
| Hint3         | NM_025798    | 0.0114421   | -1.26688 |
| Rab13         | NM_001042499 | 0.0315323   | -1.26703 |
| N4bp2         | NM_001024917 | 0.0062454   | -1.26704 |
| Mpp7          | NM_001081287 | 0.035113    | -1.26704 |
| Xbp1          | NM_013842    | 0.0207521   | -1.26705 |
| Flot2         | NM_001040403 | 0.00760534  | -1.26712 |
| Tbc1d13       | NM_146252    | 0.00451228  | -1.26716 |
| Saps3         | NM_001164159 | 0.00949294  | -1.26733 |
| Detn1         | NM_007835    | 0.0194776   | -1.26743 |
| Sdhc          | NM_025321    | 0.0183699   | -1.26745 |
| Urgcp         | NM_001077661 | 0.0202451   | -1.26757 |
| Tpi1          | NM_009415    | 3.33E-05    | -1.2677  |
| Kif13b        | NM_001081177 | 0.000653558 | -1.2678  |
| Epb4.115      | NM_001113416 | 0.0225228   | -1.268   |
| Rabgef1       | NM_019983    | 0.0119404   | -1.26806 |
| Lamb1-1       | NM_008482    | 0.0362931   | -1.26812 |
| Rnf216        | NM_080561    | 0.0106471   | -1.26824 |
| Ddo           | NM_027442    | 0.0345262   | -1.26843 |
| Bpnt1         | NM_011794    | 0.0182716   | -1.26844 |
| Mul1          | NM_026689    | 0.0320027   | -1.26872 |
| 1600021P15Rik | NM_177718    | 0.0395221   | -1.26876 |
| Ppp2r5d       | NM_009358    | 0.0153872   | -1.2689  |
| Myo1e         | NM_181072    | 0.0484015   | -1.26903 |
| Ralgps2       | NM_001159965 | 0.000245257 | -1.26906 |
| LOC100044376  | XR_030576    | 0.0421307   | -1.26909 |
| ---           | ---          | 0.0423469   | -1.26922 |
| Slc25a39      | NM_026542    | 0.0400877   | -1.26924 |

|               |              |             |          |
|---------------|--------------|-------------|----------|
| Gzmm          | NM_008504    | 0.043762    | -1.26929 |
| Rfxap         | NM_133231    | 0.0224378   | -1.26929 |
| Sorl1         | NM_011436    | 0.040068    | -1.26941 |
| Gmppa         | NM_133708    | 0.0366668   | -1.26953 |
| Ncapd2        | NM_146171    | 0.0355732   | -1.26953 |
| Osbp2         | NM_152818    | 0.00489355  | -1.26968 |
| Fkbp8         | NM_001111066 | 0.00813068  | -1.2701  |
| Tmem201       | NM_001025106 | 0.015494    | -1.27013 |
| Cmtm6         | NM_026036    | 0.00146743  | -1.27037 |
| Mapt          | NM_001038609 | 0.0450029   | -1.27056 |
| Gfra1         | NM_010279    | 0.0427743   | -1.2706  |
| Gstm1         | NM_010358    | 0.0131716   | -1.2709  |
| Prss36        | NM_001081374 | 0.00784214  | -1.27092 |
| St3gal5       | NM_001035228 | 0.0480837   | -1.27101 |
| Phf21a        | NM_001109690 | 0.00233836  | -1.27104 |
| Pthr2         | NM_001098810 | 0.0259104   | -1.27123 |
| Dedd          | NM_001128609 | 0.030562    | -1.27143 |
| 5730480H06Rik | ---          | 0.0181134   | -1.2716  |
| Tomm40l       | NM_001037170 | 0.00165273  | -1.27226 |
| Scmh1         | NM_001159630 | 0.000810893 | -1.27233 |
| Cpxm2         | NM_018867    | 0.0367559   | -1.27249 |
| Etnk1         | NM_029250    | 0.0040603   | -1.27262 |
| Adck2         | NM_178873    | 0.0169356   | -1.27262 |
| Prss23        | NM_029614    | 0.0270718   | -1.27265 |
| Prkag1        | NM_016781    | 0.00150168  | -1.27269 |
| Pltp          | NM_011125    | 0.0404211   | -1.27287 |
| Syt11         | NM_018804    | 0.0241325   | -1.27288 |
| Camsap1       | NM_001115076 | 0.036452    | -1.27295 |
| Vdac1         | NM_011694    | 0.00644738  | -1.27302 |
| Wars          | NM_001164314 | 0.00933581  | -1.27323 |
| Suox          | NM_173733    | 0.0153367   | -1.27345 |
| Hcfc1r1       | NM_181821    | 0.0184147   | -1.27346 |
| Prpf8         | NM_138659    | 0.0371527   | -1.2736  |
| Akt1s1        | NM_026270    | 0.0328839   | -1.27361 |
| R3hdm2        | NM_001168292 | 0.0462654   | -1.27403 |
| Man1b1        | NM_001029983 | 0.0284005   | -1.27429 |
| Zfr           | NM_011767    | 0.0103805   | -1.27456 |
| Rrbp1         | NM_024281    | 0.0144743   | -1.27458 |
| L3mbtl3       | NM_172787    | 0.0245689   | -1.27509 |
| Tinagl1       | NM_001168333 | 0.0401363   | -1.27516 |
| Ldb2          | NM_001077398 | 0.046716    | -1.27519 |
| Helz          | NM_198298    | 0.0340093   | -1.27541 |

|               |              |             |          |
|---------------|--------------|-------------|----------|
| Chmp4b        | NM_029362    | 0.00225531  | -1.27547 |
| Cblb          | NM_001033238 | 0.0226635   | -1.27553 |
| Phb2          | NM_007531    | 0.00192044  | -1.27555 |
| Rab11fip2     | NM_001033172 | 0.0196847   | -1.27555 |
| Atrnl1        | NM_181415    | 0.00446634  | -1.27559 |
| Nfia          | NM_001122952 | 0.00593834  | -1.27569 |
| Ints7         | NM_178632    | 0.000333915 | -1.27573 |
| Ing4          | NM_133345    | 0.0349773   | -1.27577 |
| Rgmb          | NM_178615    | 0.0232715   | -1.27599 |
| Oxnad1        | NM_145460    | 0.00536633  | -1.27606 |
| Ssbp3         | NM_023672    | 0.00736665  | -1.2763  |
| BC052040      | NM_001145898 | 0.0402804   | -1.27642 |
| Klf6          | NM_011803    | 0.0458866   | -1.2765  |
| Snap29        | NM_023348    | 0.00291666  | -1.27655 |
| Stx4a         | NM_009294    | 0.00752649  | -1.27661 |
| Rsfl          | NM_001081267 | 0.0153915   | -1.27663 |
| Mtor          | NM_020009    | 0.0154249   | -1.27665 |
| Slc25a30      | NM_026232    | 0.0281476   | -1.2768  |
| Myo6          | NM_001039546 | 0.00314771  | -1.27685 |
| A130082M07Rik | XM_001471582 | 0.0179454   | -1.27685 |
| Kifc3         | NM_001145831 | 0.0300338   | -1.27686 |
| Tmem120b      | NM_001039723 | 0.00659055  | -1.27696 |
| Coro6         | NM_139128    | 0.0253151   | -1.27717 |
| Zfp46         | NM_009557    | 0.00140579  | -1.27744 |
| Dgcr2         | NM_001109750 | 0.022918    | -1.27755 |
| Ube2h         | NM_001169576 | 0.01549     | -1.27759 |
| ---           | ---          | 0.005561    | -1.27768 |
| Osbpl6        | NM_145525    | 0.0331469   | -1.2781  |
| ---           | ---          | 0.0148635   | -1.27828 |
| Letm1         | NM_019694    | 0.0312545   | -1.27837 |
| Tgfbr3        | NM_011578    | 0.00643716  | -1.27852 |
| Dhrs13        | NM_183286    | 0.0351674   | -1.2788  |
| Il10rb        | NM_008349    | 0.0030661   | -1.27919 |
| Ylpm1         | NM_178363    | 0.016399    | -1.27921 |
| Zbtb8a        | NM_028603    | 0.0222598   | -1.27924 |
| Gm447         | NM_001007590 | 0.0117288   | -1.27939 |
| Homer2        | NM_001164086 | 0.00956927  | -1.27961 |
| C230096C10Rik | NM_001039200 | 0.00246655  | -1.28002 |
| Pacs2         | NM_001081170 | 0.0181194   | -1.28003 |
| Arhgef17      | NM_001081116 | 0.0442111   | -1.28004 |
| Tcl1b3        | NM_013772    | 0.0125758   | -1.28064 |
| 5530402H23Rik | ---          | 0.0403425   | -1.28087 |

|               |              |             |          |
|---------------|--------------|-------------|----------|
| Slc25a19      | NM_026071    | 0.033666    | -1.28146 |
| Telo2         | NM_001163661 | 0.0198032   | -1.28177 |
| Phactr2       | NM_001033257 | 0.0272706   | -1.2819  |
| Ywhae         | NM_009536    | 0.00558237  | -1.28195 |
| Hadh          | NM_008212    | 0.000432675 | -1.28203 |
| Klhl8         | NM_178741    | 0.00374969  | -1.28204 |
| Eltf1         | NM_133222    | 0.0404969   | -1.28213 |
| Ppara         | NM_001113418 | 0.0499591   | -1.28214 |
| Trim25        | NM_009546    | 0.000364874 | -1.28224 |
| Pcmd1         | NM_183028    | 0.00520618  | -1.28227 |
| Fam69b        | NM_019833    | 0.0261141   | -1.28243 |
| Ralgap1       | NM_001003719 | 0.0268064   | -1.28259 |
| Slc9a3r2      | NM_023055    | 0.0250475   | -1.28274 |
| Ppm1b         | NM_001159496 | 0.0436173   | -1.28282 |
| Actb          | NM_007393    | 0.0191086   | -1.28283 |
| Mia3          | NM_177389    | 0.000635828 | -1.28285 |
| AW125324      | ---          | 0.0345631   | -1.28288 |
| Ssh2          | NM_177710    | 0.0163749   | -1.28296 |
| Crat          | NM_007760    | 0.0220454   | -1.28302 |
| Sel1l         | NM_001039089 | 0.0124317   | -1.28317 |
| Fktn          | NM_139309    | 0.00396333  | -1.28383 |
| 9030617O03Rik | NM_145448    | 0.0442305   | -1.28413 |
| Edem3         | NM_001039644 | 0.000618651 | -1.28422 |
| Lpcat3        | NM_145130    | 0.0100395   | -1.28453 |
| Tmem140       | NM_197986    | 0.0423175   | -1.28462 |
| 1110029L17Rik | ---          | 0.0122922   | -1.28521 |
| Pitpnc1       | NM_145823    | 0.0259445   | -1.28556 |
| Btrc          | NM_001037758 | 0.0189621   | -1.28558 |
| Cd1d1         | NM_007639    | 0.0277058   | -1.28566 |
| Amz2          | NM_025275    | 0.0128381   | -1.28567 |
| 2310058N22Rik | ---          | 0.0149939   | -1.2858  |
| ---           | ---          | 0.0245418   | -1.28581 |
| Smg7          | NM_001005507 | 0.00849464  | -1.28589 |
| Cobll1        | NM_027225    | 0.000650162 | -1.28605 |
| Ensa          | NM_001026212 | 0.0366774   | -1.28616 |
| Atg2b         | NM_029654    | 0.0310887   | -1.2863  |
| A230051G13Rik | NM_173785    | 0.0284615   | -1.28649 |
| LOC665506     | XM_977361    | 0.0263379   | -1.28671 |
| Slc25a11      | NM_024211    | 0.0181949   | -1.28678 |
| Rrp1          | NM_010925    | 0.00422085  | -1.28711 |
| Anp32e        | NM_023210    | 0.00445616  | -1.28713 |
| Prkar2a       | NM_008924    | 0.00469075  | -1.28718 |

|               |              |             |          |
|---------------|--------------|-------------|----------|
| Ttyh2         | NM_053273    | 0.0272268   | -1.28743 |
| Alg2          | NM_019998    | 0.0144749   | -1.28748 |
| Exoc8         | NM_198103    | 0.00725788  | -1.28795 |
| Disp1         | NM_026866    | 0.0494241   | -1.28821 |
| Mavs          | NM_144888    | 0.00204391  | -1.28824 |
| P2ry1         | NM_008772    | 0.0490785   | -1.2884  |
| Zfp161        | NM_009547    | 0.0494973   | -1.28858 |
| Trafd1        | NM_001163470 | 0.00112628  | -1.28875 |
| Gtpbp1        | NM_013818    | 0.014721    | -1.28878 |
| Tmem80        | NM_001141950 | 0.0391935   | -1.28879 |
| 6330416G13Rik | NM_144905    | 0.0159355   | -1.28911 |
| Parp12        | NM_172893    | 0.0408522   | -1.28922 |
| Foxn3         | NM_183186    | 0.00150902  | -1.28924 |
| Mta1          | NM_054081    | 0.041363    | -1.28942 |
| Evc           | NM_021292    | 0.026807    | -1.28946 |
| 4632418H02Rik | ---          | 0.0354092   | -1.28963 |
| Dpp8          | NM_028906    | 0.00186448  | -1.28983 |
| Prps2         | NM_026662    | 0.029163    | -1.28984 |
| 4930402H24Rik | NM_029432    | 0.0136269   | -1.29013 |
| Bmp1          | NM_009755    | 0.00489938  | -1.29039 |
| Tor1aip1      | NM_001160018 | 0.0111478   | -1.29046 |
| Ophn1         | NM_052976    | 0.0317449   | -1.29048 |
| Dennd3        | NM_001081066 | 0.0103635   | -1.29063 |
| Abcd1         | NM_007435    | 0.00208407  | -1.29086 |
| Snrk          | NM_001164572 | 0.0197855   | -1.29105 |
| Trip11        | NM_028446    | 0.00513525  | -1.29105 |
| Gnpat         | NM_010322    | 0.00481912  | -1.29107 |
| Gramd4        | NM_172611    | 0.0280349   | -1.29112 |
| Parp1         | NM_007415    | 0.0121691   | -1.29118 |
| Plekha2       | NM_031257    | 0.00048144  | -1.29131 |
| Chd8          | NM_201637    | 0.00939163  | -1.29151 |
| 6330408A02Rik | NM_177312    | 0.00241497  | -1.29202 |
| Cyba          | NM_007806    | 0.0144802   | -1.29205 |
| Mapk3         | NM_011952    | 0.00164143  | -1.2921  |
| Nit2          | NM_023175    | 0.00239945  | -1.2922  |
| Klh14         | NM_172781    | 0.0212073   | -1.29222 |
| Eepd1         | NM_026189    | 0.0276589   | -1.2923  |
| Cds2          | NM_138651    | 0.000168656 | -1.29234 |
| Oas2          | NM_145227    | 0.0243751   | -1.29251 |
| Slc16a9       | NM_025807    | 0.00978113  | -1.29266 |
| Fblim1        | NM_001163256 | 0.0175742   | -1.29276 |
| Mbd1          | NM_013594    | 0.00429316  | -1.29278 |

|               |              |             |          |
|---------------|--------------|-------------|----------|
| Hcfc1r1       | NM_181821    | 0.00435123  | -1.29286 |
| Dst           | NM_133833    | 0.0191215   | -1.29312 |
| Cc2d2a        | NM_172274    | 0.000963252 | -1.29368 |
| Acy1          | NM_025371    | 0.0270275   | -1.29378 |
| Mkrl          | NM_018810    | 0.0301253   | -1.29382 |
| Fam71e1       | NM_028169    | 0.00472765  | -1.29385 |
| Fam175a       | NM_172405    | 0.00405331  | -1.29416 |
| Abhd11        | NM_145215    | 0.0162731   | -1.29428 |
| Arrb1         | NM_177231    | 0.0284368   | -1.29449 |
| 2310061I04Rik | NM_001033630 | 0.00791314  | -1.29456 |
| 1700113I22Rik | NM_026865    | 0.00481981  | -1.29496 |
| Suclg2        | NM_011507    | 0.0165968   | -1.29539 |
| Ecsit         | NM_012029    | 0.00453376  | -1.29546 |
| Pfkl          | NM_008826    | 0.0350359   | -1.29556 |
| Trip10        | NM_134125    | 0.00897249  | -1.29559 |
| Tle3          | NM_001083927 | 0.0226576   | -1.29562 |
| Ampd3         | NM_009667    | 0.0122465   | -1.29598 |
| Map2k6        | NM_011943    | 0.00576036  | -1.2961  |
| 1700113I22Rik | NM_026865    | 0.0186017   | -1.29623 |
| Ncor1         | NM_011308    | 0.00251043  | -1.29643 |
| BC013712      | NM_001033308 | 0.0454255   | -1.29667 |
| 2700089E24Rik | NM_001163445 | 0.0342154   | -1.29668 |
| Zfp385b       | NM_001113399 | 0.030116    | -1.29681 |
| Entpd5        | NM_001026214 | 0.0358342   | -1.29709 |
| Bcl9          | NM_029933    | 0.00202062  | -1.29715 |
| Shmt2         | NM_028230    | 0.0391168   | -1.2972  |
| Gm10786       | ---          | 0.00860997  | -1.29729 |
| Stc2          | NM_011491    | 0.00487291  | -1.29741 |
| Hspa9         | NM_010481    | 0.000152502 | -1.29743 |
| Nsf           | NM_008740    | 0.00856499  | -1.29768 |
| Btbd3         | NM_001025431 | 0.0427042   | -1.29776 |
| Iqsec2        | NM_001005475 | 0.00299399  | -1.2979  |
| C030014I23Rik | ---          | 0.0203427   | -1.29824 |
| Cbl           | NM_007619    | 0.0249668   | -1.29856 |
| Zdhhc3        | NM_026917    | 0.0445803   | -1.29881 |
| Zfp62         | NM_001024846 | 0.0217001   | -1.29897 |
| Adar          | NM_001038587 | 0.00405748  | -1.29899 |
| Ruvbl2        | NM_011304    | 0.00741202  | -1.299   |
| Wars          | NM_001164314 | 0.0104933   | -1.29903 |
| Asb7          | NM_080443    | 0.00172257  | -1.29921 |
| Dtx4          | NM_172442    | 0.0141093   | -1.29927 |
| Zmat2         | NM_025594    | 0.00946614  | -1.29953 |

|               |              |             |          |
|---------------|--------------|-------------|----------|
| C730029A08Rik | ---          | 0.00772737  | -1.29965 |
| Zhx3          | NM_177263    | 0.000349436 | -1.29969 |
| Aplp2         | NM_001102455 | 0.00805172  | -1.30011 |
| Csnk2b        | NM_009975    | 0.0225127   | -1.30012 |
| Pnpo          | NM_134021    | 0.00147169  | -1.30023 |
| Hgsnat        | NM_029884    | 0.00834281  | -1.30024 |
| 1700021K19Rik | NM_172615    | 0.0131464   | -1.30034 |
| Arfrp1        | NM_001165991 | 0.000817702 | -1.30041 |
| Nr1h2         | NM_009473    | 0.0018264   | -1.30088 |
| Rnf150        | NM_177378    | 0.00865118  | -1.30096 |
| Slc20a2       | NM_011394    | 0.0184299   | -1.30097 |
| Arhgef18      | NM_133962    | 0.00349319  | -1.30151 |
| P2rx5         | NM_033321    | 0.0309353   | -1.30158 |
| H2-K1         | NM_001001892 | 0.00765082  | -1.30186 |
| Arhgef19      | NM_172520    | 0.0372117   | -1.30201 |
| Cdc14b        | NM_001122989 | 0.0186913   | -1.30211 |
| P2rx4         | NM_011026    | 0.0298387   | -1.30222 |
| Aplp2         | NM_001102455 | 0.00980258  | -1.30232 |
| Bsg           | NM_001077184 | 0.00527947  | -1.30237 |
| Tgfb1         | NM_009369    | 0.0367562   | -1.30256 |
| Alox5         | NM_009662    | 0.0418938   | -1.30283 |
| Grb2          | NM_008163    | 0.0137754   | -1.30309 |
| Crat          | NM_007760    | 0.00710378  | -1.30315 |
| Kctd5         | NM_027008    | 0.00875899  | -1.30316 |
| Cry1          | NM_007771    | 0.0129986   | -1.30363 |
| D0H4S114      | NM_001109988 | 0.0247871   | -1.30365 |
| Cyb5b         | NM_025558    | 0.00253294  | -1.30365 |
| Ap1m1         | NM_007456    | 0.000774919 | -1.30417 |
| Fsd2          | NM_172904    | 0.00212352  | -1.30433 |
| Mmaa          | NM_133823    | 0.0203696   | -1.30444 |
| Neur14        | NM_001013414 | 0.0432515   | -1.30464 |
| Tnfrsf21      | NM_178589    | 0.0211962   | -1.30471 |
| Pdgfrb        | NM_001146268 | 0.0410153   | -1.30479 |
| Card6         | NM_001163138 | 0.013791    | -1.30481 |
| Pacsin3       | NM_028733    | 0.0497307   | -1.30498 |
| Aifm2         | NM_001039194 | 0.0031527   | -1.30509 |
| Scly          | NM_016717    | 0.0153381   | -1.30522 |
| 5430417C01Rik | ---          | 0.0455561   | -1.30544 |
| Vps37a        | NM_033560    | 0.0146925   | -1.30556 |
| LOC100045148  | NM_001130149 | 0.00676724  | -1.30559 |
| Prpf19        | NM_134129    | 0.00255654  | -1.3057  |
| 1300001I01Rik | NM_001081158 | 0.0327697   | -1.30573 |



|               |              |            |          |
|---------------|--------------|------------|----------|
| Hyou1         | NM_021395    | 0.0299614  | -1.30583 |
| Pank1         | NM_001114339 | 0.00244488 | -1.3059  |
| Ebf1          | NM_007897    | 0.00374379 | -1.306   |
| Ifi2711       | NM_026790    | 0.0258833  | -1.30603 |
| Tnik          | NM_001163007 | 0.00391989 | -1.30606 |
| Mrpl14        | NM_026732    | 0.03271    | -1.30628 |
| Frrs1         | NM_001113478 | 0.0265689  | -1.30632 |
| Tmem98        | NM_029537    | 0.0104175  | -1.30636 |
| Trex1         | NM_001012236 | 0.0059216  | -1.30636 |
| Dlg1          | NM_007862    | 0.0159044  | -1.30643 |
| Chka          | NM_001025566 | 0.0151298  | -1.30663 |
| Ptbp1         | NM_001077363 | 7.46E-05   | -1.30688 |
| Pard3         | NM_001013580 | 0.0394097  | -1.30689 |
| ---           | ---          | 0.00509127 | -1.30698 |
| Sun1          | NM_024451    | 0.00727921 | -1.30704 |
| Kctd20        | NM_025888    | 0.0301391  | -1.30751 |
| Litaf         | NM_019980    | 0.00940539 | -1.30776 |
| 9430016H08Rik | NM_001081181 | 0.0104935  | -1.3081  |
| 2810004N23Rik | NM_025615    | 0.00865899 | -1.30817 |
| Cnot10        | NM_153585    | 0.00622214 | -1.30842 |
| Katnal1       | NM_153572    | 0.00869717 | -1.30852 |
| Hadh          | NM_008212    | 0.0105463  | -1.30853 |
| Wdr5          | NM_080848    | 0.00816528 | -1.30863 |
| Syt11         | NM_018804    | 0.0190293  | -1.30874 |
| Sumo3         | NM_019929    | 0.00758843 | -1.30879 |
| Smardc1       | NM_031842    | 0.00388313 | -1.30881 |
| Hcfc1         | NM_008224    | 0.00790246 | -1.30898 |
| ---           | ---          | 0.0165749  | -1.30908 |
| Wdr55         | NM_026464    | 0.008726   | -1.30921 |
| Pigo          | NM_020035    | 0.00843853 | -1.30938 |
| A930005H10Rik | NR_015487    | 0.0247101  | -1.30974 |
| Ganab         | NM_008060    | 0.0349985  | -1.30997 |
| Calm3         | NM_007590    | 0.0164852  | -1.31    |
| Tlcd2         | NM_027249    | 0.0468112  | -1.31017 |
| Pent          | NM_008787    | 0.0175933  | -1.31029 |
| Exosc5        | NM_138586    | 0.038574   | -1.31051 |
| Appl2         | NM_145220    | 0.0269926  | -1.31092 |
| Capzb         | NM_001037761 | 0.0091318  | -1.31119 |
| Isoc2b        | NM_026158    | 0.0188118  | -1.31132 |
| Pent          | NM_008787    | 0.0127583  | -1.31149 |
| Psme1         | NM_011189    | 0.0228789  | -1.31153 |
| Rptor         | NM_028898    | 0.0187373  | -1.31173 |

|               |              |             |          |
|---------------|--------------|-------------|----------|
| Stard8        | NM_199018    | 0.00135263  | -1.3118  |
| Svil          | NM_153153    | 0.0106521   | -1.3119  |
| Svil          | NM_153153    | 0.00212759  | -1.312   |
| Ppte7         | NM_177242    | 0.00587612  | -1.31212 |
| 1110012J17Rik | NM_001114098 | 0.0387703   | -1.31247 |
| Zfp712        | NM_001166218 | 0.0140842   | -1.31302 |
| Lcmt2         | NM_177846    | 0.0324684   | -1.31315 |
| Srd5a1        | NM_175283    | 0.011601    | -1.31325 |
| Dnmt3a        | NM_007872    | 0.0240775   | -1.31335 |
| Zfp451        | NM_133817    | 0.0359213   | -1.31344 |
| Cnot7         | NM_011135    | 0.0090581   | -1.31363 |
| Aco1          | NM_007386    | 0.0225335   | -1.31383 |
| 2610036D13Rik | NM_029282    | 0.00359828  | -1.31396 |
| 1300010F03Rik | NM_027906    | 0.0105527   | -1.31414 |
| Abcf3         | NM_013852    | 0.0159135   | -1.31456 |
| Ppp2r4        | NM_138748    | 0.00404587  | -1.31474 |
| Rap1gap       | NM_001081155 | 0.0449593   | -1.31486 |
| Opa3          | NM_207525    | 0.00236197  | -1.31516 |
| Itpkc         | NM_181593    | 0.00799999  | -1.31517 |
| Tbc1d1        | NM_019636    | 0.0134253   | -1.31525 |
| Cyp2j6        | NM_010008    | 0.0486136   | -1.31537 |
| Tspan2        | NM_027533    | 0.0431327   | -1.31539 |
| Gna12         | NM_010302    | 0.0022676   | -1.3155  |
| Ank2          | NM_001034168 | 0.00386998  | -1.31578 |
| Yipf5         | NM_023311    | 0.0196004   | -1.31584 |
| Ralgapa2      | NM_001033348 | 0.00304097  | -1.31588 |
| Polr3d        | NM_001164082 | 0.0147904   | -1.31588 |
| Cyp51         | NM_020010    | 0.0246117   | -1.31614 |
| AA408213      | ---          | 0.038627    | -1.31627 |
| Anks1         | NM_181413    | 0.0237724   | -1.31638 |
| Lpcat1        | NM_145376    | 0.0153139   | -1.3164  |
| Agtpbp1       | NM_001048008 | 0.000268423 | -1.31647 |
| Stxbp5        | NM_001081344 | 0.0197074   | -1.31676 |
| Map1lc3b      | NM_026160    | 0.0166722   | -1.31679 |
| Cdc123        | NM_133837    | 0.0405928   | -1.3168  |
| Mthfr         | NM_001161798 | 0.0140637   | -1.31684 |
| Kbtbd12       | NM_001142724 | 0.0360451   | -1.31709 |
| Gstp1         | NM_013541    | 0.00157679  | -1.31727 |
| Ifi2711       | NM_026790    | 0.0100619   | -1.3174  |
| Pde2a         | NM_001008548 | 0.0228557   | -1.31747 |
| Cyth1         | NM_001112699 | 0.00270383  | -1.31749 |
| Nars          | NM_001142950 | 0.00910286  | -1.31755 |

|               |              |             |          |
|---------------|--------------|-------------|----------|
| 2310047B19Rik | NM_025870    | 0.0260644   | -1.31761 |
| Lysmd4        | NM_175215    | 0.0148627   | -1.31769 |
| Csnk1d        | NM_027874    | 0.0188785   | -1.31777 |
| Naa40         | NM_027643    | 0.0229051   | -1.31775 |
| Dpep1         | NM_007876    | 0.0157654   | -1.31783 |
| Dennd4b       | NM_201407    | 0.00148107  | -1.31833 |
| Cmb1          | NM_181588    | 0.0439288   | -1.31851 |
| E330009J07Rik | NM_175528    | 0.00178666  | -1.31872 |
| Nutf2         | NM_026532    | 0.0056307   | -1.31875 |
| Myst4         | NM_017479    | 0.000588164 | -1.31876 |
| Dlc1          | NM_015802    | 0.018083    | -1.31879 |
| Wdtd1         | NM_199306    | 0.0190018   | -1.3188  |
| Slc25a26      | NM_026255    | 0.0433501   | -1.319   |
| ---           | ---          | 0.000364686 | -1.31904 |
| Nebp2         | NM_026554    | 0.0344734   | -1.31923 |
| Tanc1         | NM_198294    | 0.00319266  | -1.31934 |
| Qser1         | NM_001123327 | 0.025       | -1.31939 |
| Srebf2        | NM_033218    | 0.00319428  | -1.31958 |
| Brd8          | NM_030147    | 0.0139303   | -1.3197  |
| Alas1         | NM_020559    | 0.0494251   | -1.32003 |
| Dtx3l         | NM_001013371 | 0.0247946   | -1.32075 |
| E430010N07Rik | ---          | 0.0173675   | -1.32114 |
| Hist3h2a      | NM_178218    | 0.000772461 | -1.32128 |
| Usp9x         | NM_009481    | 0.0179861   | -1.32138 |
| Ccng2         | NM_007635    | 0.021525    | -1.32153 |
| Fbxl20        | NM_028149    | 0.0244045   | -1.32156 |
| Entpd5        | NM_001026214 | 0.0247516   | -1.32157 |
| Chd7          | NM_001081417 | 0.014157    | -1.32158 |
| Obscn         | NM_001003914 | 0.00216535  | -1.3216  |
| Pramef8       | NM_172877    | 0.00697893  | -1.32169 |
| Larp4b        | NM_172585    | 0.00348148  | -1.32194 |
| Slc36a1       | NM_153139    | 0.0053935   | -1.32201 |
| Parm1         | NM_145562    | 0.0187406   | -1.32207 |
| Gns           | NM_029364    | 0.0102307   | -1.32228 |
| LOC676870     | NM_008783    | 0.00117784  | -1.32235 |
| Tpk1          | NM_013861    | 0.0301373   | -1.3227  |
| Adamts13      | XM_194370    | 0.00562361  | -1.32279 |
| Ssbp3         | NM_023672    | 0.00532772  | -1.32287 |
| 4930422I07Rik | NM_001142943 | 0.022407    | -1.32295 |
| Acvrl1        | NM_009612    | 0.00413056  | -1.32315 |
| Slc25a19      | NM_026071    | 0.00968998  | -1.32316 |
| Isyna1        | NM_023627    | 0.0102164   | -1.32329 |

|               |              |            |          |
|---------------|--------------|------------|----------|
| Rnf169        | NM_175388    | 0.00313167 | -1.32359 |
| Irx1          | NM_010573    | 0.0437018  | -1.32383 |
| 2610528E23Rik | NM_025599    | 0.0172219  | -1.3241  |
| Iqsec1        | NM_001134383 | 0.0348793  | -1.32429 |
| Egln1         | NM_053207    | 0.0227614  | -1.32454 |
| Pdp2          | NM_001024606 | 0.025397   | -1.32465 |
| Asb13         | NM_080857    | 0.002595   | -1.32482 |
| Camta2        | NM_178116    | 0.0383826  | -1.32494 |
| LOC671957     | NM_001024712 | 0.00996083 | -1.32619 |
| Rcsd1         | NM_001038846 | 0.00311606 | -1.32633 |
| Clip4         | NM_030179    | 0.011132   | -1.3264  |
| Plxna1        | NM_008881    | 0.00713315 | -1.32652 |
| Prlr          | NM_011169    | 0.0187185  | -1.32654 |
| Parp11        | NM_181402    | 0.0257379  | -1.3266  |
| Prpf39        | NM_177806    | 0.00108288 | -1.32678 |
| Gpatch8       | NM_001159492 | 0.00988627 | -1.32728 |
| Unc119b       | NM_175352    | 0.0094236  | -1.32737 |
| Lhpp          | NM_029609    | 0.0286038  | -1.32746 |
| Tex261        | NM_009357    | 0.0254415  | -1.32769 |
| Lass4         | NM_026058    | 0.00954488 | -1.32846 |
| Alg8          | NM_199035    | 0.0119603  | -1.32872 |
| Ehd1          | NM_010119    | 0.00453315 | -1.32918 |
| Zyg11b        | NM_001033634 | 0.020923   | -1.32938 |
| Tmcc3         | NM_001168684 | 0.0056185  | -1.32939 |
| ---           | ---          | 0.0034888  | -1.32949 |
| Pdzd8         | NM_001033222 | 0.0146313  | -1.3297  |
| 1810044D09Rik | ---          | 0.0271711  | -1.32975 |
| Calr          | NM_007591    | 0.00338351 | -1.32978 |
| 5730410E15Rik | NM_001032727 | 0.0333512  | -1.32979 |
| Hspa5         | NM_001163434 | 0.00679457 | -1.33021 |
| Cybb          | NM_007807    | 0.0491225  | -1.33044 |
| Pcnx13        | NM_144868    | 0.0284027  | -1.33098 |
| Zfp462        | NM_172867    | 0.0331175  | -1.33098 |
| ---           | ---          | 0.00882951 | -1.33127 |
| Tmem229b      | NM_001170401 | 0.0173704  | -1.33134 |
| Mtmt6         | NM_144843    | 0.0176999  | -1.33137 |
| Iqsec1        | NM_001134383 | 0.00846683 | -1.33137 |
| Grip2         | NM_001159507 | 0.0261135  | -1.33152 |
| Pex26         | NM_028730    | 0.0406362  | -1.33155 |
| Synj2         | NM_001113351 | 0.0047515  | -1.33183 |
| Rpap1         | NM_001163701 | 0.00676756 | -1.33187 |
| Dapk1         | NM_029653    | 0.0127567  | -1.33222 |

|          |              |             |          |
|----------|--------------|-------------|----------|
| Cited2   | NM_010828    | 0.0409968   | -1.33229 |
| ---      | ---          | 0.0452042   | -1.33245 |
| Shmt2    | NM_028230    | 0.0123467   | -1.33251 |
| Bcl2l13  | NM_153516    | 0.00771867  | -1.3326  |
| Tspan13  | NM_025359    | 0.000713697 | -1.33275 |
| H2-Ke2   | NM_010385    | 0.00799142  | -1.33289 |
| ---      | ---          | 0.0193716   | -1.33326 |
| Dtx3l    | NM_001013371 | 0.0213853   | -1.33329 |
| Ncoa1    | NM_010881    | 0.0130063   | -1.33361 |
| Tspan15  | NM_197996    | 0.00268986  | -1.33363 |
| Rcor3    | NM_144814    | 0.00456425  | -1.33378 |
| Nsun2    | NM_145354    | 0.0126827   | -1.33386 |
| Cgnl1    | NM_026599    | 0.0102435   | -1.33421 |
| Gmppa    | NM_133708    | 0.00565953  | -1.33425 |
| Nap1l4   | NM_008672    | 0.00102213  | -1.33431 |
| Nsmaf    | NM_010945    | 0.00506955  | -1.33431 |
| Ube2h    | NM_001169576 | 0.0031145   | -1.33449 |
| ---      | ---          | 0.0391305   | -1.33457 |
| Kctd12b  | NM_175429    | 0.0189546   | -1.33458 |
| Lbh      | NM_029999    | 0.0131585   | -1.33477 |
| Tacc2    | NM_001004468 | 0.032607    | -1.33511 |
| Eef1a2   | NM_007906    | 0.0232131   | -1.33539 |
| Elmo2    | NM_080287    | 0.00633067  | -1.3354  |
| Pcid2    | NM_178708    | 0.00598996  | -1.33542 |
| Mcoln1   | NM_053177    | 0.00525288  | -1.33558 |
| Pou2f1   | NM_011137    | 0.00331416  | -1.3356  |
| Angptl6  | NM_145154    | 0.00176621  | -1.33561 |
| Nacc2    | NM_001037098 | 0.00729782  | -1.33568 |
| Frem2    | NM_172862    | 0.0202495   | -1.33585 |
| Cmya5    | NM_023821    | 0.0075677   | -1.33597 |
| Fryl     | NM_028194    | 0.0292471   | -1.33605 |
| Smr2     | NM_021289    | 0.00226614  | -1.33633 |
| Dnaja3   | NM_001135112 | 0.0478807   | -1.33638 |
| ---      | ---          | 0.0138361   | -1.33642 |
| Entpd5   | NM_001026214 | 0.0200607   | -1.33645 |
| Rhot2    | NM_145999    | 0.0111456   | -1.33651 |
| Myo1b    | NM_001161817 | 0.00331235  | -1.33673 |
| Impa2    | NM_053261    | 0.0309009   | -1.33688 |
| Mettl7a1 | NM_027334    | 0.0338997   | -1.33694 |
| Sobp     | NM_175407    | 0.0110205   | -1.33701 |
| Plce1    | NM_019588    | 0.0107426   | -1.33705 |
| Ncoa2    | NM_001077695 | 0.0310184   | -1.33738 |

|               |              |             |          |
|---------------|--------------|-------------|----------|
| Sh3bp5        | NM_011894    | 0.00716153  | -1.33753 |
| H2afb3        | XM_619451    | 0.0176262   | -1.3376  |
| Ppp5c         | NM_011155    | 0.0132165   | -1.33773 |
| Mapt          | NM_001038609 | 0.0221978   | -1.33859 |
| Samm50        | NM_178614    | 0.0021607   | -1.33961 |
| Rnf122        | NM_175136    | 0.00356334  | -1.33985 |
| Fasn          | NM_007988    | 0.0290668   | -1.34018 |
| H2-K1         | NM_001001892 | 0.0238108   | -1.34027 |
| Reps1         | NM_001111065 | 0.00126892  | -1.34028 |
| Mertk         | NM_008587    | 0.00282434  | -1.34122 |
| Lsm12         | NM_172947    | 0.0023539   | -1.34122 |
| Ptgds         | NM_008963    | 0.00782979  | -1.3415  |
| Eef2          | NM_007907    | 0.0302538   | -1.3417  |
| Egfl7         | NM_001164564 | 0.00881837  | -1.34222 |
| A2bp1         | NM_021477    | 0.023771    | -1.34275 |
| Clip4         | NM_030179    | 0.0291115   | -1.34279 |
| Herpud1       | NM_022331    | 0.0458026   | -1.34292 |
| Tuba8         | NM_017379    | 0.022755    | -1.34294 |
| Crtc3         | NM_173863    | 0.0254858   | -1.34326 |
| Taf10         | NM_020024    | 0.028527    | -1.3433  |
| Kri1          | NM_145416    | 0.0130328   | -1.34351 |
| Wdr81         | NM_138950    | 0.0130965   | -1.344   |
| Pank1         | NM_001114339 | 0.0325686   | -1.34449 |
| Pum1          | NM_001159603 | 0.00328716  | -1.34453 |
| Zdhhc14       | NM_146073    | 0.00561544  | -1.34465 |
| Map3k4        | NM_011948    | 0.00547994  | -1.34489 |
| 4932433N03Rik | ---          | 0.00654437  | -1.34493 |
| Rnf167        | NM_027445    | 0.0135363   | -1.34533 |
| Atg2a         | NM_194348    | 0.0484367   | -1.34593 |
| Prodh         | NM_011172    | 0.0422417   | -1.34601 |
| 2510009E07Rik | NM_001001881 | 0.0251236   | -1.34616 |
| Dhrs3         | NM_001172424 | 0.0100859   | -1.34631 |
| Smad3         | NM_016769    | 0.00335731  | -1.34695 |
| BC026590      | NM_001081420 | 0.016118    | -1.34706 |
| Poll          | NM_020032    | 0.0016958   | -1.3472  |
| Ptdss2        | NM_013782    | 0.0426824   | -1.34721 |
| Cnst          | NM_146105    | 0.0127859   | -1.34722 |
| Trappc5       | NM_025701    | 0.0115296   | -1.34723 |
| LOC100047441  | NM_028722    | 0.0279501   | -1.34783 |
| Pomt2         | NM_153415    | 0.00223735  | -1.34795 |
| Sspn          | NM_010656    | 0.000906253 | -1.34839 |
| Dlst          | NM_030225    | 0.00998435  | -1.34895 |

|               |              |             |          |
|---------------|--------------|-------------|----------|
| 2310051F07Rik | ---          | 0.00692489  | -1.34899 |
| Trim14        | NM_029077    | 0.0373381   | -1.34926 |
| Adi1          | NM_134052    | 0.00203886  | -1.34949 |
| Dusp23        | NM_026725    | 0.0471576   | -1.34951 |
| Rere          | NM_001085492 | 0.0226629   | -1.34965 |
| Mccc2         | NM_030026    | 0.0449488   | -1.34989 |
| Dnajc3        | NM_008929    | 0.00462133  | -1.35007 |
| Spg11         | NM_145531    | 0.0166398   | -1.35019 |
| Cttnbp2nl     | NM_001163332 | 0.00342384  | -1.35021 |
| Wnk2          | NM_029361    | 0.036579    | -1.35029 |
| Map1lc3a      | NM_025735    | 0.00135169  | -1.35091 |
| Mgll          | NM_001166249 | 0.038061    | -1.35091 |
| Kcna7         | NM_010596    | 0.0016641   | -1.35092 |
| Inadl         | NM_001005784 | 0.000840928 | -1.351   |
| Abcc9         | NM_001044720 | 0.00643126  | -1.35126 |
| Blnk          | NM_008528    | 0.00481498  | -1.35137 |
| Tmem143       | NM_144801    | 0.0122099   | -1.35173 |
| Lman2         | NM_025828    | 0.00297194  | -1.35206 |
| Slc12a6       | NM_133648    | 0.000895588 | -1.3523  |
| Dnajc3        | NM_008929    | 0.0460174   | -1.35253 |
| Ppapdc3       | NM_145521    | 0.0224141   | -1.35259 |
| Stat1         | NM_009283    | 0.045698    | -1.3528  |
| Rilpl1        | NM_021430    | 0.0134665   | -1.35311 |
| Sec16a        | NM_153125    | 0.0115037   | -1.35341 |
| Rgs12         | NM_001163512 | 0.00118781  | -1.35371 |
| Notch3        | NM_008716    | 0.0290831   | -1.35401 |
| Eif4g3        | NM_172703    | 0.00975747  | -1.35427 |
| Mef2a         | NM_001033713 | 0.000139886 | -1.35433 |
| Hspd1         | NM_010477    | 0.000405882 | -1.35448 |
| Epb4.113      | NM_013813    | 0.0298685   | -1.35455 |
| Adi1          | NM_134052    | 0.00255731  | -1.35472 |
| Dapk1         | NM_029653    | 0.0293254   | -1.35475 |
| Cd19          | NM_009844    | 0.00703637  | -1.35513 |
| ---           | ---          | 0.0160283   | -1.35524 |
| Smap2         | NM_133716    | 0.0412732   | -1.35525 |
| Cdk18         | NM_008795    | 0.0158018   | -1.35555 |
| H2-D1         | NM_010380    | 0.0456453   | -1.35558 |
| Arid5b        | NM_023598    | 0.00880825  | -1.35567 |
| ---           | ---          | 0.00768144  | -1.35577 |
| Cpeb3         | NM_198300    | 0.005289    | -1.35615 |
| Fto           | NM_011936    | 0.00447197  | -1.35622 |
| Sp100         | NM_013673    | 0.0396889   | -1.35629 |

|               |              |             |          |
|---------------|--------------|-------------|----------|
| Erap1         | NM_030711    | 0.00270022  | -1.35645 |
| Atp1a2        | NM_178405    | 0.00685761  | -1.35693 |
| Akt1s1        | NM_026270    | 0.0366522   | -1.35714 |
| LOC100046744  | NM_175229    | 0.0322782   | -1.35721 |
| ---           | ---          | 0.0121158   | -1.35734 |
| Rhpn2         | NM_027897    | 0.0170773   | -1.35745 |
| Clasp1        | NM_001081276 | 0.00770951  | -1.3582  |
| H2afb3        | NM_172620    | 0.000482591 | -1.35824 |
| 1700020C11Rik | NM_026443    | 0.00200843  | -1.35853 |
| Ccdc127       | NM_001168658 | 0.0212723   | -1.35855 |
| Ogfod2        | NM_025671    | 0.00310947  | -1.35859 |
| Rapgef4       | NM_019688    | 0.0263414   | -1.3586  |
| Slc25a35      | NM_028048    | 0.0231995   | -1.35861 |
| Cbx6          | NM_028763    | 0.00666256  | -1.35877 |
| Prpf19        | NM_134129    | 0.000502522 | -1.35882 |
| Gmppa         | NM_133708    | 0.00386157  | -1.35904 |
| Smg6          | NM_001002764 | 0.0271503   | -1.35941 |
| Npr2          | NM_173788    | 0.00152663  | -1.35979 |
| Cnot10        | NM_153585    | 0.0393441   | -1.35994 |
| Pds5a         | NM_001081321 | 0.0209588   | -1.35994 |
| Cpd           | NM_007754    | 0.00584526  | -1.36017 |
| Gns           | NM_029364    | 0.0103214   | -1.36023 |
| Dhx37         | NM_203319    | 0.00481491  | -1.36046 |
| Phf17         | NM_001130184 | 0.00138484  | -1.36065 |
| Dcps          | NM_027030    | 0.00108315  | -1.36081 |
| Rorc          | NM_011281    | 0.0372737   | -1.36092 |
| ---           | ---          | 0.0226461   | -1.36104 |
| Mll3          | NM_001081383 | 0.0303652   | -1.3613  |
| Supt7l        | NM_028150    | 9.06E-05    | -1.36163 |
| Entpd5        | NM_001026214 | 0.0320412   | -1.36195 |
| Kenq1         | NM_008434    | 0.00910487  | -1.36209 |
| Rgl1          | NM_016846    | 0.0121927   | -1.36211 |
| Fbl           | NM_007991    | 0.0124041   | -1.36221 |
| Scpep1        | NM_029023    | 0.0166973   | -1.36247 |
| Gorasp2       | NM_027352    | 0.0263362   | -1.36252 |
| Gas6          | NM_019521    | 0.0381763   | -1.36266 |
| Higd1c        | NM_001002900 | 0.0461096   | -1.36278 |
| Cc2d1b        | NM_177045    | 0.00158202  | -1.36282 |
| Gpd2          | NM_001145820 | 0.00209828  | -1.36292 |
| BC038331      | ---          | 0.00308128  | -1.36331 |
| Pom121        | NM_148932    | 0.0407502   | -1.36376 |
| Pitpnc1       | NM_145823    | 0.00255164  | -1.36402 |



|               |              |             |          |
|---------------|--------------|-------------|----------|
| Fam120b       | NM_024203    | 0.0103814   | -1.36424 |
| Rhobtb2       | NM_153514    | 0.0024679   | -1.36426 |
| Lama3         | NM_010680    | 0.00323909  | -1.3644  |
| Lamb1-1       | NM_008482    | 0.00489288  | -1.3647  |
| Nid1          | NM_010917    | 0.021865    | -1.36502 |
| Impa2         | NM_053261    | 0.0480126   | -1.36586 |
| Nmnat3        | NM_144533    | 0.0106527   | -1.36633 |
| Zfp691        | NM_001145935 | 0.00192534  | -1.3664  |
| Mettl1        | NM_010792    | 0.0210593   | -1.36658 |
| LOC100045163  | NM_025806    | 0.00976244  | -1.36669 |
| Kdm4a         | NM_001161823 | 0.0181004   | -1.36679 |
| Prkce         | NM_011104    | 0.0441918   | -1.36689 |
| Rnf125        | NM_026301    | 1.04E-06    | -1.36709 |
| Magix         | NM_018832    | 0.0369657   | -1.36709 |
| Tyk2          | NM_018793    | 0.0440671   | -1.3677  |
| Ttc28         | NM_024477    | 0.0467544   | -1.36783 |
| Nfya          | NM_001110832 | 0.00311022  | -1.36784 |
| Pkm2          | NM_011099    | 0.00642302  | -1.3679  |
| Dock4         | NM_172803    | 0.00946717  | -1.36821 |
| Ube2i         | NM_001177609 | 0.00630928  | -1.36822 |
| Sars2         | NM_023637    | 0.0250669   | -1.36837 |
| Adipor1       | NM_028320    | 0.00120699  | -1.3685  |
| ---           | ---          | 0.0102152   | -1.36859 |
| Rtn4ip1       | NM_130892    | 0.00399486  | -1.36863 |
| Helb          | NM_080446    | 0.00319423  | -1.36872 |
| 2310015A10Rik | NR_033514    | 0.0151618   | -1.36875 |
| Pfk1          | NM_008826    | 0.00399865  | -1.36876 |
| Pramef8       | NM_172877    | 0.0124231   | -1.36884 |
| Fam160a1      | NM_172682    | 0.00663388  | -1.36903 |
| Dctd          | NM_001161515 | 0.0225055   | -1.36911 |
| Egfr          | NM_007912    | 0.0283781   | -1.36912 |
| Ywhae         | NM_009536    | 0.00309597  | -1.36957 |
| Suds3         | NM_001122666 | 0.000658326 | -1.36966 |
| Thy1          | NM_009382    | 0.0135252   | -1.36989 |
| Tuba8         | NM_017379    | 0.0207278   | -1.37002 |
| Abtb2         | NM_178890    | 0.00281118  | -1.37003 |
| Notch3        | NM_008716    | 0.0148063   | -1.37036 |
| Mta2          | NM_011842    | 0.0293334   | -1.37043 |
| Dnajb2        | NM_001159883 | 0.0206525   | -1.37048 |
| Alpk2         | NM_001037294 | 0.0395805   | -1.37077 |
| Bat2l         | NM_001159634 | 0.0162171   | -1.37126 |
| Acot7         | NM_001146057 | 0.00807137  | -1.37149 |

|               |              |             |          |
|---------------|--------------|-------------|----------|
| Zbtb20        | NM_019778    | 0.0204858   | -1.37181 |
| Whsc1         | NM_001081102 | 0.0113063   | -1.37188 |
| Vapb          | NM_019806    | 0.0108314   | -1.37194 |
| 0610009O20Rik | NM_024179    | 0.00281949  | -1.37231 |
| Stox2         | NM_001114311 | 0.00402867  | -1.37243 |
| Drap1         | NM_024176    | 0.0310057   | -1.37278 |
| Sbno1         | NM_001081203 | 0.00378676  | -1.37285 |
| Glb1          | NM_009752    | 0.0139607   | -1.37322 |
| Gpam          | NM_008149    | 0.000731377 | -1.37351 |
| AW987390      | ---          | 0.000509863 | -1.37367 |
| Slc44a2       | NM_152808    | 0.0153654   | -1.37415 |
| Plin4         | NM_020568    | 0.00849229  | -1.37436 |
| Cds2          | NM_138651    | 0.0111786   | -1.37479 |
| Ube2z         | NM_172300    | 0.0173225   | -1.37496 |
| Rangrf        | NM_021329    | 0.00951718  | -1.37514 |
| Ncoa1         | NM_010881    | 0.0095902   | -1.37537 |
| Apol7a        | NM_001164640 | 0.0169102   | -1.3757  |
| H2-D1         | NM_010380    | 0.0482554   | -1.376   |
| Coro1b        | NM_011778    | 0.00416526  | -1.37617 |
| Cdh4          | NM_009867    | 0.00536552  | -1.37723 |
| Nbas          | NM_027706    | 0.00219407  | -1.37731 |
| Adck5         | NM_172960    | 0.00115045  | -1.37761 |
| Nsg1          | NM_010942    | 0.00461979  | -1.37764 |
| Ggct          | NM_026637    | 0.00799804  | -1.3778  |
| ---           | ---          | 0.0147863   | -1.37792 |
| Hist3h2a      | NM_178218    | 0.0110767   | -1.37806 |
| Atp1a2        | NM_178405    | 0.00508534  | -1.37818 |
| Jkamp         | NM_024205    | 0.0306976   | -1.37826 |
| Slc45a4       | NM_001033219 | 0.00711328  | -1.37863 |
| Calr          | NM_007591    | 0.00278143  | -1.37894 |
| Kenj3         | NM_008426    | 0.0164876   | -1.37902 |
| Tsku          | NM_001024619 | 0.0273306   | -1.37917 |
| ---           | ---          | 0.0376692   | -1.37918 |
| Dip2c         | NM_001081426 | 0.000884066 | -1.37936 |
| Siae          | NM_011734    | 0.000581755 | -1.37958 |
| Lims2         | NM_144862    | 0.0126285   | -1.37993 |
| Klf12         | NM_010636    | 0.0159941   | -1.38048 |
| Entpd5        | NM_001026214 | 0.0328702   | -1.38051 |
| ---           | ---          | 0.000892996 | -1.38072 |
| ---           | ---          | 0.0133508   | -1.38092 |
| 4930406D14Rik | ---          | 0.0218074   | -1.38103 |
| Mmab          | NM_029956    | 0.0227949   | -1.38118 |

|               |              |             |          |
|---------------|--------------|-------------|----------|
| 6230424C14Rik | ---          | 0.00260932  | -1.38234 |
| Ttl           | NM_027192    | 0.00835344  | -1.38234 |
| ---           | ---          | 0.0064043   | -1.38279 |
| ---           | ---          | 0.0354201   | -1.38296 |
| A930026I22Rik | ---          | 0.0147237   | -1.38315 |
| Atp11a        | NM_015804    | 0.00609242  | -1.38317 |
| 9330129D05Rik | NM_178799    | 0.0232045   | -1.38325 |
| Slc25a42      | NM_001007570 | 0.00291543  | -1.38329 |
| Pitpnb        | NM_019640    | 0.000143315 | -1.38334 |
| ---           | ---          | 0.0434252   | -1.38351 |
| Ttl           | NM_027192    | 0.0029614   | -1.38352 |
| Plin3         | NM_025836    | 0.0027069   | -1.38373 |
| Ddx58         | NM_172689    | 0.0217213   | -1.38375 |
| Ei24          | NM_007915    | 0.0131216   | -1.38416 |
| Zfp827        | NM_178267    | 0.0210923   | -1.38491 |
| Naprt1        | NM_172607    | 0.0116761   | -1.38493 |
| U2af1         | NM_001163769 | 0.00736654  | -1.38529 |
| Serpinh1      | NM_001111043 | 0.0272665   | -1.38569 |
| Wdr48         | NM_026236    | 0.0310731   | -1.38572 |
| Pfkfb4        | NM_173019    | 0.0283354   | -1.38618 |
| Mapre2        | NM_001162941 | 0.0175058   | -1.38627 |
| Aldh5a1       | NM_172532    | 0.0164429   | -1.38635 |
| Rtn2          | NM_001025364 | 0.0453997   | -1.38694 |
| Inpp1         | NM_008384    | 0.00807822  | -1.38714 |
| Tsc22d3       | NM_001077364 | 0.0377719   | -1.38722 |
| ---           | ---          | 0.00147687  | -1.3875  |
| Fat4          | NM_183221    | 0.00186399  | -1.38762 |
| Trp53         | NM_001127233 | 0.0208471   | -1.38776 |
| Tmem116       | NM_001161626 | 0.0312466   | -1.38813 |
| D1Ert448e     | ---          | 0.000143433 | -1.38815 |
| Sympk         | NM_026605    | 0.0474358   | -1.38845 |
| Crip2         | NM_024223    | 0.00241622  | -1.38899 |
| LOC100046672  | NM_001164314 | 0.000433852 | -1.38968 |
| Opa3          | NM_207525    | 0.00253827  | -1.38969 |
| Ppp5c         | NM_011155    | 0.0152028   | -1.39042 |
| Thumpd1       | NM_145585    | 0.000548695 | -1.39046 |
| Slc31a2       | NM_025286    | 0.00552093  | -1.39093 |
| Lonrf2        | NM_001029878 | 0.0185609   | -1.39102 |
| Kcnd3         | NM_001039347 | 0.0142106   | -1.39166 |
| Clpb          | NM_009191    | 0.0126795   | -1.39179 |
| Rundc1        | NM_172566    | 0.000707057 | -1.39269 |
| Trim54        | NM_021447    | 0.0409855   | -1.39289 |

|               |              |             |          |
|---------------|--------------|-------------|----------|
| Srebf2        | NM_033218    | 0.010713    | -1.39297 |
| Mrps2         | NM_001166031 | 0.0263642   | -1.39323 |
| Slc22a5       | NM_011396    | 0.00230673  | -1.39348 |
| Zfp828        | NM_181854    | 0.000114341 | -1.39369 |
| H6pd          | NM_173371    | 0.0372271   | -1.39456 |
| BC006779      | NM_183162    | 0.0177936   | -1.39486 |
| Parp1         | NM_007415    | 0.00916506  | -1.39538 |
| Ak2           | NM_001033966 | 0.000536701 | -1.39551 |
| Rfwd3         | NM_146218    | 0.00645246  | -1.39557 |
| Huwe1         | NM_021523    | 0.00156728  | -1.39573 |
| Epn2          | NM_010148    | 0.00113256  | -1.39613 |
| Pm20d1        | NM_178079    | 0.0263845   | -1.39637 |
| Top1mt        | NM_028404    | 0.0389604   | -1.39655 |
| Slc25a26      | NM_026255    | 0.00580738  | -1.39669 |
| Mmp15         | NM_008609    | 0.0364449   | -1.39677 |
| Arap3         | NM_139206    | 0.039339    | -1.397   |
| Tmcc3         | NM_001168684 | 0.00102218  | -1.39723 |
| Sgpl1         | NM_009163    | 0.0317473   | -1.39736 |
| A1452195      | ---          | 0.0185712   | -1.39812 |
| Otud5         | NM_138604    | 0.00822144  | -1.39819 |
| Rab11b        | NM_008997    | 6.04E-05    | -1.39823 |
| Cnot6l        | NM_144910    | 0.0224129   | -1.39837 |
| Usf1          | NM_009480    | 0.0108999   | -1.39844 |
| Dapk2         | NM_010019    | 0.00732499  | -1.39906 |
| Arfrp1        | NM_001165991 | 0.00172183  | -1.39912 |
| Cdc37l1       | NM_025950    | 0.0162793   | -1.39936 |
| Suclg2        | NM_011507    | 0.000975165 | -1.39941 |
| Pygm          | NM_011224    | 0.00518376  | -1.39945 |
| Mpped2        | NM_001143683 | 0.0136392   | -1.39948 |
| Ttc17         | NM_183106    | 0.00839588  | -1.39954 |
| Zfp238        | NM_001012330 | 0.001711176 | -1.39957 |
| Pfas          | NM_001159519 | 0.0230426   | -1.39981 |
| Fyco1         | NM_001110253 | 0.00112668  | -1.40022 |
| Actb          | NM_007393    | 0.0233699   | -1.40033 |
| D14Ert449e    | NM_025311    | 0.0270456   | -1.40059 |
| Gtf2i         | NM_001080746 | 0.0346627   | -1.40067 |
| 1810012P15Rik | NM_001076681 | 0.0373789   | -1.40106 |
| Rph3al        | NM_029548    | 0.00655871  | -1.40135 |
| Tssc4         | NM_001115085 | 0.0318071   | -1.40143 |
| Stard13       | NM_001163493 | 0.0033602   | -1.40152 |
| Vezf1         | NM_016686    | 0.0354082   | -1.40157 |
| ---           | ---          | 0.000992389 | -1.40172 |

|               |              |             |          |
|---------------|--------------|-------------|----------|
| Ank1          | NM_001110783 | 0.0076895   | -1.40193 |
| Usp19         | NM_001168371 | 0.0244933   | -1.40226 |
| Emilin2       | NM_145158    | 0.0149402   | -1.40291 |
| Ddit4l        | NM_030143    | 0.0174844   | -1.40301 |
| Sash1         | NM_175155    | 0.026049    | -1.40331 |
| Sec16a        | NM_153125    | 0.00224333  | -1.40405 |
| ---           | ---          | 0.0441393   | -1.40418 |
| Ino80d        | NM_001081436 | 4.98E-05    | -1.40478 |
| Lmod3         | NM_001081157 | 0.00179792  | -1.40522 |
| Fbxo31        | NM_133765    | 0.00242011  | -1.4058  |
| Pfkfb2        | NM_001162415 | 0.0336547   | -1.40585 |
| Zcchc2        | NM_001122675 | 0.02991     | -1.40614 |
| Abcc9         | NM_001044720 | 0.01838     | -1.4062  |
| Fbxw2         | NM_001164768 | 0.00784878  | -1.40621 |
| Sox6          | NM_001025559 | 0.0340779   | -1.40667 |
| Mrpl37        | NM_025500    | 0.00483947  | -1.40686 |
| Cyhr1         | NM_019396    | 0.0310266   | -1.40708 |
| Usp19         | NM_001168371 | 0.000423738 | -1.40743 |
| Lpcat1        | NM_145376    | 0.00905112  | -1.40759 |
| Glb1          | NM_009752    | 0.000316509 | -1.40802 |
| Tgfb1         | NM_011577    | 0.0360245   | -1.40861 |
| Atp6ap1       | NM_018794    | 7.97E-05    | -1.40899 |
| Rad1          | NM_011232    | 0.0479336   | -1.40909 |
| Mast4         | NM_175171    | 0.0156104   | -1.40918 |
| Fkbp1         | NM_019873    | 0.0125737   | -1.40931 |
| Stip1         | NM_016737    | 0.000761319 | -1.40983 |
| Hivep2        | NM_010437    | 0.0206808   | -1.41077 |
| LOC100048559  | NM_001078167 | 0.0226263   | -1.41107 |
| Zhx2          | NM_199449    | 0.00989964  | -1.41196 |
| Epn2          | NM_010148    | 0.00397218  | -1.41248 |
| Ddc           | NM_016672    | 0.0451866   | -1.4128  |
| Gys1          | NM_030678    | 0.0281075   | -1.41321 |
| Synj2         | NM_001113351 | 0.00361601  | -1.41348 |
| 4632415K11Rik | NM_028883    | 0.00102399  | -1.41384 |
| Adprh1        | NM_172750    | 0.000397081 | -1.4148  |
| H1f0          | NM_008197    | 0.00102014  | -1.41522 |
| Gatsl2        | NM_030719    | 0.00741421  | -1.41541 |
| Fat4          | NM_183221    | 0.0108382   | -1.41609 |
| Fktn          | NM_139309    | 0.00365311  | -1.41635 |
| Ap1ar         | NM_145964    | 0.0292118   | -1.41655 |
| Spnb1         | NM_013675    | 0.000942466 | -1.4167  |
| 2310051F07Rik | ---          | 0.00180154  | -1.41684 |

|               |              |             |          |
|---------------|--------------|-------------|----------|
| Pxmp2         | NM_008993    | 0.0224919   | -1.41711 |
| Cyb5d2        | NM_001024926 | 0.000984415 | -1.41716 |
| Sort1         | NM_019972    | 0.000142475 | -1.41718 |
| Aplnr         | NM_011784    | 0.0201988   | -1.41746 |
| ---           | ---          | 0.039954    | -1.41782 |
| Rsad2         | NM_021384    | 0.0341396   | -1.41797 |
| Cpeb3         | NM_198300    | 0.00376542  | -1.41806 |
| Vps72         | NM_009336    | 0.0152086   | -1.41823 |
| Cars2         | NM_024248    | 0.0363488   | -1.41864 |
| Pnmal2        | NM_001099636 | 7.27E-05    | -1.41871 |
| Anxa6         | NM_001110211 | 0.0018473   | -1.41884 |
| Cln6          | NM_001033175 | 0.00340825  | -1.41895 |
| Rasa3         | NM_009025    | 0.0180468   | -1.41903 |
| Ppm1l         | NM_178726    | 0.00884895  | -1.4193  |
| LOC100046932  | NM_001081092 | 0.0196679   | -1.41934 |
| Rilpl1        | NM_021430    | 0.00287465  | -1.41958 |
| Gna12         | NM_010302    | 0.0104454   | -1.4206  |
| 9930017N22Rik | ---          | 0.0105547   | -1.42089 |
| Tmem51        | NM_145402    | 0.00399988  | -1.42102 |
| Zbtb20        | NM_019778    | 0.00163398  | -1.42112 |
| Qsox2         | NM_153559    | 0.000480902 | -1.4215  |
| Ppara         | NM_001113418 | 0.0146596   | -1.42163 |
| Cmtm6         | NM_026036    | 0.0209049   | -1.4226  |
| Ppip5k1       | NM_178795    | 0.0297286   | -1.42266 |
| A2bp1         | NM_021477    | 0.048743    | -1.42274 |
| Rmnd1         | NM_025343    | 0.0161108   | -1.42322 |
| Ubc           | NM_019639    | 0.0123868   | -1.4242  |
| Ndufa4l2      | NM_001098789 | 0.00122018  | -1.42447 |
| Mlec          | NM_175403    | 0.000970911 | -1.42484 |
| LOC671957     | NM_001024712 | 0.0080087   | -1.42484 |
| Jarid2        | NM_021878    | 0.000486975 | -1.42489 |
| Reep1         | NM_178608    | 0.00188817  | -1.4256  |
| Dnajc18       | NM_029669    | 0.0317104   | -1.42669 |
| Klf9          | NM_010638    | 0.0198109   | -1.42697 |
| Fbxo21        | NM_145564    | 0.00191697  | -1.42701 |
| 5430405G05Rik | NM_001160363 | 0.0486226   | -1.42731 |
| Pm20d1        | NM_178079    | 0.00164637  | -1.42822 |
| Nqo2          | NM_001163239 | 0.000471477 | -1.42828 |
| Cdc14b        | NM_001122989 | 0.000807584 | -1.42832 |
| Atp2b1        | NM_026482    | 0.0111543   | -1.42847 |
| Gtf2a1        | NM_031391    | 0.00528134  | -1.42854 |
| Acsl3         | NM_001033606 | 0.0350992   | -1.42913 |

|               |              |             |          |
|---------------|--------------|-------------|----------|
| St5           | NM_001001326 | 0.000376237 | -1.42931 |
| Apln          | NM_013912    | 0.0253505   | -1.42983 |
| Klf7          | NM_033563    | 0.00514712  | -1.43068 |
| Ehd2          | NM_153068    | 0.0109416   | -1.43102 |
| 4921531C22Rik | ---          | 0.000339825 | -1.43135 |
| Csrp1         | NM_007791    | 0.048268    | -1.43165 |
| Pik3r6        | NM_001004435 | 0.00357862  | -1.43175 |
| A1131651      | ---          | 0.0341507   | -1.43249 |
| Vapb          | NM_019806    | 0.0079575   | -1.4331  |
| D4Wsu53e      | NM_023665    | 0.0295273   | -1.43339 |
| Tecr          | NM_027179    | 0.00409238  | -1.43355 |
| 8030497I03Rik | ---          | 0.0354643   | -1.43365 |
| Cfl1          | NM_007687    | 0.00665578  | -1.43397 |
| Ak3           | NM_021299    | 8.46E-05    | -1.43459 |
| Cxcr4         | NM_009911    | 0.0429821   | -1.43471 |
| Bmf           | NM_138313    | 0.0128481   | -1.43544 |
| Hadha         | NM_178878    | 0.0102454   | -1.43545 |
| Ilvbl         | NM_173751    | 0.00702935  | -1.43572 |
| ---           | ---          | 0.000891676 | -1.43621 |
| Scfd1         | NM_029825    | 0.00905042  | -1.43679 |
| Zfp787        | NM_001013012 | 0.00970511  | -1.43712 |
| Lynx1         | NM_011838    | 0.00306075  | -1.43724 |
| Actb          | NM_007393    | 0.00992769  | -1.43768 |
| Ccdc56        | NM_026618    | 0.042156    | -1.43781 |
| Gcat          | NM_001161712 | 0.0408665   | -1.43798 |
| 9930024M15Rik | ---          | 0.0272984   | -1.4383  |
| Emp2          | NM_007929    | 0.000654428 | -1.43846 |
| Flcn          | NM_146018    | 0.000591764 | -1.43924 |
| Polr1b        | NM_009086    | 0.000400244 | -1.43984 |
| Gnptab        | NM_001004164 | 0.0310132   | -1.44072 |
| Stk38         | NM_134115    | 0.000568783 | -1.44079 |
| Cox10         | NM_178379    | 0.0267921   | -1.44109 |
| Smardc2       | NM_001130187 | 0.00760308  | -1.44112 |
| Rell1         | NM_145923    | 0.00145964  | -1.44145 |
| Ergic1        | NM_026170    | 0.0248402   | -1.44238 |
| Oaz2          | NM_010952    | 0.0119041   | -1.44344 |
| Msrb2         | NM_029619    | 0.0277405   | -1.44358 |
| Lmtk2         | NM_001081109 | 0.0115439   | -1.44376 |
| MacroD2       | NM_001013802 | 0.000691707 | -1.44424 |
| Deaf4         | NM_001165256 | 0.00244658  | -1.44495 |
| Slc16a10      | NM_001114332 | 0.000405557 | -1.44583 |
| Lgi1          | NM_020278    | 0.0349351   | -1.4465  |

|               |              |             |          |
|---------------|--------------|-------------|----------|
| Tubgcp4       | NM_153387    | 0.0210668   | -1.44727 |
| Pla2g15       | NM_133792    | 0.0108225   | -1.44748 |
| Flad1         | NM_177041    | 0.000722393 | -1.4475  |
| Slc20a2       | NM_011394    | 0.00139118  | -1.44771 |
| Mpdu1         | NM_011900    | 0.00944768  | -1.44931 |
| Ctsb          | NM_007798    | 0.0078444   | -1.44961 |
| Cxcr7         | NM_007722    | 0.00158849  | -1.44972 |
| Zbtb12        | NM_198886    | 0.03257     | -1.45037 |
| Fnde5         | NM_027402    | 0.000566206 | -1.45038 |
| Kdr           | NM_010612    | 0.0301022   | -1.45117 |
| Snrpd3        | NM_026095    | 0.0106448   | -1.45176 |
| Mcoln1        | NM_053177    | 0.00559748  | -1.45197 |
| Galnt12       | NM_030166    | 0.00264631  | -1.45212 |
| Snx5          | NM_024225    | 0.00350461  | -1.4534  |
| Mrpl19        | NM_026490    | 0.00253902  | -1.45367 |
| Slc38a3       | NM_023805    | 0.00450874  | -1.4538  |
| Ahsa1         | NM_146036    | 0.00221328  | -1.45388 |
| 2410137M14Rik | NM_029747    | 0.00594176  | -1.45395 |
| Ube2b         | NM_009458    | 0.0376003   | -1.45439 |
| Aen           | NM_001162939 | 0.00742636  | -1.45473 |
| Depdc5        | NM_001025426 | 0.00192162  | -1.45506 |
| Slc24a3       | NM_053195    | 0.020587    | -1.45559 |
| 2310061I04Rik | NM_001033630 | 0.000872693 | -1.45579 |
| Dync1h1       | NM_030238    | 0.0144007   | -1.45605 |
| Anapc1        | NM_008569    | 0.00502748  | -1.45608 |
| Calr          | NM_007591    | 0.00156093  | -1.45619 |
| Dgcr6         | NM_010047    | 0.00661377  | -1.45623 |
| Cpd           | NM_007754    | 0.0482424   | -1.45675 |
| Rab3a         | NM_001166399 | 0.00905675  | -1.45694 |
| E130203B14Rik | NM_178791    | 0.000514668 | -1.45702 |
| Ccdc47        | NM_026009    | 0.0234352   | -1.45724 |
| Pggt1b        | NM_172627    | 0.00485854  | -1.45731 |
| Sepw1         | NM_009156    | 0.0143577   | -1.45756 |
| Cyb5r3        | NM_029787    | 0.0111097   | -1.45793 |
| Foxs1         | NM_010226    | 0.00959771  | -1.45811 |
| Abcf1         | NM_013854    | 0.0111097   | -1.45815 |
| AU020206      | ---          | 0.00252487  | -1.45817 |
| Zfp536        | NM_172385    | 0.0258601   | -1.4583  |
| ---           | ---          | 0.0123835   | -1.45868 |
| Nth1          | NM_008743    | 0.0190825   | -1.45887 |
| Akap1         | NM_001042541 | 0.000362309 | -1.45977 |
| Isoc1         | NM_025478    | 0.00110045  | -1.46037 |



|               |              |             |          |
|---------------|--------------|-------------|----------|
| Ankrd50       | NM_001033198 | 0.00121403  | -1.46094 |
| Mall          | NM_145532    | 0.0295026   | -1.46096 |
| Polr3gl       | NM_027241    | 0.00285363  | -1.46166 |
| Fastk         | NM_023229    | 0.000744647 | -1.46168 |
| Nhsl1         | NM_001163592 | 0.000949727 | -1.46248 |
| Syt11         | NM_018804    | 0.00306851  | -1.46251 |
| A130040M12Rik | NR_002860    | 0.0203544   | -1.4626  |
| 2810046L04Rik | NM_173382    | 0.0217808   | -1.46268 |
| Adcy9         | NM_009624    | 0.00305001  | -1.46284 |
| Zfp319        | NM_024467    | 0.0417731   | -1.46348 |
| ---           | ---          | 0.0438166   | -1.46463 |
| Rab17         | NM_001159725 | 0.0417558   | -1.46626 |
| Nceh1         | NM_178772    | 6.50E-05    | -1.46637 |
| Acaa1a        | NM_130864    | 0.0158947   | -1.46701 |
| Ldlr          | NM_010700    | 0.00655873  | -1.4679  |
| Ogdh          | NM_010956    | 0.00506309  | -1.46808 |
| Ets2          | NM_011809    | 0.0173348   | -1.46837 |
| Ppp5c         | NM_011155    | 0.00422202  | -1.46843 |
| Arid1a        | NM_001080819 | 0.00364716  | -1.46845 |
| Ptgr2         | NM_029880    | 0.00116089  | -1.4685  |
| Orai3         | NM_198424    | 9.09E-05    | -1.46942 |
| Sc5d          | NM_172769    | 0.0068031   | -1.47073 |
| LOC100048105  | NM_019639    | 0.013735    | -1.47101 |
| Tap1          | NM_001161730 | 0.0394765   | -1.47149 |
| Pgam2         | NM_018870    | 0.0059095   | -1.47197 |
| D930001B02    | ---          | 0.0111856   | -1.47296 |
| Mier1         | NM_001039081 | 0.0311729   | -1.47326 |
| Srrm4         | NM_026886    | 0.00848325  | -1.47338 |
| Alg3          | NM_145939    | 0.00654761  | -1.47344 |
| Pde1c         | NM_001025568 | 0.0228053   | -1.47396 |
| Adamts9       | NM_175314    | 0.00700968  | -1.4741  |
| Mcc           | NM_001085373 | 0.0477766   | -1.47463 |
| Rab6b         | NM_173781    | 0.0155923   | -1.47506 |
| Fbxo32        | NM_026346    | 0.0128381   | -1.47643 |
| Ly6e          | NM_001164036 | 0.0355938   | -1.47695 |
| A130022J15Rik | NM_175313    | 0.00716672  | -1.47696 |
| Dpep1         | NM_007876    | 0.00454641  | -1.47761 |
| Eif2ak2       | NM_011163    | 0.00564201  | -1.47775 |
| Sos1          | NM_009231    | 0.000196546 | -1.47838 |
| Kctd7         | NM_172509    | 0.0303143   | -1.47851 |
| Pxdn          | NM_181395    | 0.00411033  | -1.47861 |
| Ccdc56        | NM_026618    | 0.041332    | -1.47867 |

|               |              |             |          |
|---------------|--------------|-------------|----------|
| Adamts12      | NM_175501    | 0.00153789  | -1.4793  |
| Syt7          | NM_018801    | 0.00465883  | -1.47971 |
| Cdh5          | NM_009868    | 0.0353363   | -1.4806  |
| Pik3ip1       | NM_178149    | 0.0414224   | -1.48164 |
| Dgke          | NM_019505    | 0.0097224   | -1.48187 |
| Vamp3         | NM_009498    | 0.00918162  | -1.48201 |
| Gtf3c2        | NM_027901    | 0.00980646  | -1.48295 |
| Tln2          | NM_001081242 | 0.00428643  | -1.48317 |
| Prkd3         | NM_001171004 | 4.28E-05    | -1.48333 |
| Suv420h2      | NM_001115018 | 0.0254415   | -1.4835  |
| D930015E06Rik | NM_172681    | 0.0113697   | -1.48374 |
| Egfl7         | NM_001164564 | 0.0204793   | -1.48395 |
| Tecr          | NM_027179    | 0.0022697   | -1.48404 |
| Capzb         | NM_001037761 | 0.0139251   | -1.48461 |
| Zfp784        | NM_001039532 | 0.0121553   | -1.48531 |
| Ctnnd1        | NM_001085448 | 0.0127487   | -1.48774 |
| ---           | ---          | 0.0217952   | -1.48836 |
| ---           | ---          | 0.0129649   | -1.48869 |
| Ctnnb1        | NM_001165902 | 0.00839778  | -1.48924 |
| Irf2bp2       | NM_001164598 | 0.0157368   | -1.48927 |
| Gpr182        | NM_007412    | 0.0158186   | -1.48939 |
| H2-K1         | NM_001001892 | 0.0152618   | -1.49019 |
| Mtmr4         | NM_133215    | 0.00241519  | -1.49019 |
| Cd38          | NM_007646    | 0.00243942  | -1.49108 |
| Calcoco1      | NM_026192    | 0.0115475   | -1.49129 |
| Gent2         | NM_008105    | 0.0157903   | -1.49185 |
| Nampt         | NM_021524    | 0.0330621   | -1.49249 |
| Sox6          | NM_001025559 | 0.0323446   | -1.49276 |
| Akr1c14       | NM_134072    | 0.011875    | -1.49282 |
| ---           | ---          | 0.00134411  | -1.49298 |
| Hspa12a       | NM_175199    | 0.000268542 | -1.49333 |
| Btd           | NM_025295    | 0.00315777  | -1.49342 |
| ---           | ---          | 0.00551571  | -1.49426 |
| Hdac11        | NM_144919    | 0.00218326  | -1.49508 |
| ---           | ---          | 0.000814311 | -1.49551 |
| Stom          | NM_013515    | 0.000464231 | -1.49605 |
| Tspan18       | NM_183180    | 0.00424414  | -1.49653 |
| Anapc5        | NM_001042491 | 0.0328589   | -1.49703 |
| Snrnp70       | NM_009224    | 0.0289117   | -1.49742 |
| Uqcrc1        | NM_025407    | 0.00177703  | -1.49745 |
| Myocd         | NM_145136    | 0.0260089   | -1.49803 |
| Tnxb          | NM_031176    | 0.0005987   | -1.49804 |

|               |              |             |          |
|---------------|--------------|-------------|----------|
| ---           | ---          | 0.0073281   | -1.49813 |
| Atf6          | NM_001081304 | 0.000295034 | -1.49817 |
| Arhgap9       | NM_146011    | 0.0302099   | -1.49986 |
| Etl4          | NM_001081006 | 0.00962954  | -1.5003  |
| Rab13         | NM_026677    | 0.0176402   | -1.50121 |
| Hnrnpul2      | NM_001081196 | 0.0163239   | -1.50147 |
| Slc2a12       | NM_178934    | 0.000367095 | -1.5017  |
| Zfp445        | NM_173364    | 0.00984059  | -1.50182 |
| Rgs5          | NM_009063    | 0.0130675   | -1.50183 |
| Zdhhc2        | NM_178395    | 0.02809     | -1.50278 |
| Ubc           | NM_019639    | 0.00415739  | -1.50288 |
| Zadh2         | NM_146090    | 0.0053209   | -1.50309 |
| Mccc2         | NM_030026    | 0.0347276   | -1.50316 |
| Ubc           | NM_019639    | 0.00238656  | -1.50373 |
| Adcy5         | NM_001012765 | 0.0161804   | -1.50396 |
| H2-D1         | NM_001001892 | 0.0158497   | -1.50473 |
| Prdm1         | NM_007548    | 0.0408966   | -1.50525 |
| D19Ert409e    | ---          | 0.0158735   | -1.50607 |
| Rgmb          | NM_178615    | 0.00133235  | -1.507   |
| Nr3c2         | NM_001083906 | 0.00323189  | -1.50735 |
| Pcdh12        | NM_017378    | 0.0213752   | -1.50948 |
| Fxyd2         | NM_007503    | 0.00364181  | -1.51002 |
| ---           | ---          | 0.037358    | -1.51012 |
| ---           | ---          | 0.0265202   | -1.51196 |
| BC023105      | XM_001471580 | 0.0417964   | -1.51259 |
| Ccp1          | NM_001114328 | 0.00868044  | -1.51333 |
| Mettl7a1      | NM_027334    | 0.00353287  | -1.5135  |
| LOC100044968  | XM_001473421 | 0.000579759 | -1.51359 |
| Cd82          | NM_001136055 | 0.007964    | -1.51438 |
| Glg1          | NM_009149    | 0.00622977  | -1.51441 |
| Preb          | NM_016703    | 0.000920814 | -1.51524 |
| Mgat5         | NM_145128    | 0.0143264   | -1.5159  |
| Rmnd5a        | NM_024288    | 0.000574655 | -1.51597 |
| 1810012P15Rik | NM_001076681 | 0.00608845  | -1.51622 |
| Tnfsf12       | NM_001034097 | 0.0224728   | -1.51733 |
| ---           | ---          | 0.00101651  | -1.51764 |
| Pygb          | NM_153781    | 0.0093128   | -1.51897 |
| Zfpm2         | NM_011766    | 0.000291243 | -1.51952 |
| Elt1          | NM_133222    | 0.00393442  | -1.51959 |
| Atp5g1        | NM_001161419 | 0.00146842  | -1.51994 |
| Bves          | NM_024285    | 6.65E-06    | -1.52011 |
| Bcl2l11       | NM_009754    | 0.00145585  | -1.52034 |

|               |              |             |          |
|---------------|--------------|-------------|----------|
| ---           | ---          | 0.0143199   | -1.52051 |
| Lipe          | NM_001039507 | 0.01057     | -1.52068 |
| ---           | ---          | 0.00366845  | -1.52143 |
| Ccdc71        | NM_133744    | 0.00151604  | -1.52216 |
| Ctsl          | NM_009984    | 0.0133872   | -1.52369 |
| Cmtm8         | NM_027294    | 0.00829298  | -1.5241  |
| Abcc9         | NM_001044720 | 0.00413988  | -1.52414 |
| Scd2          | NM_009128    | 0.0063595   | -1.52435 |
| 4833441D16Rik | ---          | 0.0292325   | -1.52451 |
| Retsat        | NM_026159    | 0.00322127  | -1.5251  |
| Sirpa         | NM_001177646 | 0.0134847   | -1.52647 |
| Ptgds         | NM_008963    | 0.0148868   | -1.52691 |
| Ubr2          | NM_001177374 | 0.00504625  | -1.52721 |
| Lrrc1         | NM_001146048 | 0.000766222 | -1.5274  |
| Lpin1         | NM_001130412 | 0.00693038  | -1.5278  |
| Plekhh1       | NM_181073    | 0.00698067  | -1.5285  |
| Gm9780        | NM_207229    | 0.000316179 | -1.52972 |
| Il17d         | NM_145837    | 0.0393675   | -1.53289 |
| Slc38a9       | NM_178746    | 0.0112273   | -1.53335 |
| Irf7          | NM_016850    | 0.0357349   | -1.53352 |
| Stom          | NM_013515    | 0.000603643 | -1.53406 |
| ---           | ---          | 0.0261524   | -1.53408 |
| St6galnac6    | NM_001025310 | 0.0109201   | -1.53421 |
| Ebf3          | NM_001113414 | 0.0317506   | -1.53446 |
| Map3k5        | NM_008580    | 0.00619739  | -1.53479 |
| 11-Sep        | NM_001009818 | 0.00868533  | -1.53528 |
| Mmp15         | NM_008609    | 0.0029684   | -1.53536 |
| Mgea5         | NM_023799    | 0.00964555  | -1.53561 |
| Tnfsf10       | NM_009425    | 0.0175131   | -1.53565 |
| Erc1          | NM_053204    | 0.000164098 | -1.53567 |
| Brd1          | NM_001033274 | 0.0276727   | -1.53632 |
| Cabc1         | NM_001163290 | 0.00279541  | -1.53703 |
| Cxcl12        | NM_001012477 | 0.025441    | -1.53706 |
| ---           | ---          | 0.00088414  | -1.5372  |
| Slc35b1       | NM_016752    | 0.000259509 | -1.53749 |
| Galm          | NM_176963    | 8.57E-05    | -1.53752 |
| Egfl7         | NM_001164564 | 0.044344    | -1.53794 |
| Sdr39u1       | NM_001082975 | 0.00526293  | -1.53826 |
| Ctnnb1        | NM_001165902 | 0.01227     | -1.53936 |
| 6330416G13Rik | NM_144905    | 0.00123641  | -1.53941 |
| Arpc4         | NM_001170485 | 0.00594451  | -1.54065 |
| Foxp1         | NM_053202    | 0.0167702   | -1.54172 |

|               |              |             |          |
|---------------|--------------|-------------|----------|
| ---           | ---          | 0.00760444  | -1.5428  |
| Kcnip2        | NM_030716    | 0.00559022  | -1.54324 |
| Aldh1l2       | NM_153543    | 0.0394539   | -1.54343 |
| Acad9         | NM_172678    | 0.00836779  | -1.54472 |
| Dnaic1        | NM_175138    | 0.0251717   | -1.54621 |
| Ehd1          | NM_010119    | 0.0262713   | -1.54678 |
| ---           | ---          | 0.0330026   | -1.54703 |
| Cyfp2         | NM_133769    | 0.00178024  | -1.54896 |
| Snx8          | NM_172277    | 0.028893    | -1.54945 |
| Arhgap28      | NM_172964    | 0.00261831  | -1.54992 |
| ---           | ---          | 0.0155696   | -1.55004 |
| Gpr107        | NM_178760    | 0.000694599 | -1.5513  |
| Rtn4ip1       | NM_130892    | 0.000888902 | -1.55317 |
| Rps6ka2       | NM_011299    | 0.00434175  | -1.55331 |
| Nav2          | NM_001111016 | 0.00081504  | -1.5537  |
| Jph2          | NM_021566    | 0.0334531   | -1.55395 |
| E030016H06Rik | ---          | 0.0367808   | -1.55403 |
| Agap1         | NM_001037136 | 0.0180014   | -1.55445 |
| Meis2         | NM_001136072 | 2.99E-05    | -1.55648 |
| Lgals3bp      | NM_011150    | 0.0124584   | -1.5569  |
| Hist2h3c2     | NM_054045    | 0.00568462  | -1.55813 |
| Pcdh17        | NM_001013753 | 0.0103454   | -1.56006 |
| ---           | ---          | 0.00516267  | -1.5601  |
| ---           | ---          | 0.00200526  | -1.5612  |
| Agpat4        | NM_026644    | 0.00232839  | -1.56128 |
| BC003266      | NM_030252    | 0.0398044   | -1.56129 |
| Irf2bp2       | NM_001164598 | 0.015365    | -1.56256 |
| Gnptab        | NM_001004164 | 0.00281155  | -1.56302 |
| Ube2d1        | NM_145420    | 0.000571851 | -1.56344 |
| Rab8a         | NM_023126    | 0.00111159  | -1.56371 |
| Hrc           | NM_010473    | 0.000511387 | -1.56428 |
| Rprd2         | NM_001081293 | 0.00712848  | -1.56438 |
| Dcakd         | NM_026551    | 0.0168391   | -1.5644  |
| Acot1         | NM_012006    | 0.0231209   | -1.56479 |
| Gstm1         | NM_010358    | 0.0141603   | -1.56484 |
| Elf1          | NM_007920    | 0.00264754  | -1.56488 |
| Ntm           | NM_172290    | 0.00394002  | -1.56526 |
| Mylk4         | NM_001166030 | 0.00401445  | -1.56659 |
| ---           | ---          | 0.0216268   | -1.56824 |
| Dhrs4         | NM_001037938 | 0.0137146   | -1.56921 |
| Vash1         | NM_177354    | 0.00152668  | -1.5705  |
| Srrm4         | NM_026886    | 0.0394738   | -1.57054 |

|               |              |             |          |
|---------------|--------------|-------------|----------|
| Cadm4         | NM_153112    | 0.000681619 | -1.57099 |
| Gpr124        | NM_054044    | 0.00799549  | -1.5724  |
| Doc2g         | NM_021791    | 0.00490321  | -1.574   |
| Gstm1         | NM_010358    | 0.023908    | -1.57413 |
| Arl2bp        | NM_024191    | 0.000748548 | -1.57413 |
| Scd2          | NM_009128    | 0.00100403  | -1.57474 |
| ---           | ---          | 0.0499662   | -1.57479 |
| Pde2a         | NM_001008548 | 0.00380232  | -1.57682 |
| Hspb8         | NM_030704    | 0.0140074   | -1.57737 |
| A1413194      | NM_201373    | 0.00593352  | -1.57776 |
| Rsad2         | NM_021384    | 0.0214416   | -1.57929 |
| Gstm1         | NM_010358    | 0.0169666   | -1.57943 |
| Bach2         | NM_001109661 | 0.00843179  | -1.57973 |
| Slc2a4        | NM_009204    | 0.00312826  | -1.5798  |
| Sae1          | NM_019748    | 0.00139999  | -1.58004 |
| Vtn           | NM_011707    | 0.0152909   | -1.58106 |
| Rap1gap2      | NM_001015046 | 0.000369149 | -1.58395 |
| Rxrg          | NM_001159731 | 0.00461759  | -1.58472 |
| Spsb1         | NM_029035    | 0.00586797  | -1.58688 |
| Acss1         | NM_080575    | 0.00728218  | -1.5875  |
| Wnt5a         | NM_009524    | 0.0338183   | -1.5879  |
| Plxdc1        | NM_001163608 | 0.00475746  | -1.58809 |
| Ldhd          | NM_027570    | 0.00646198  | -1.58926 |
| ---           | ---          | 0.00490455  | -1.58933 |
| Foxp1         | NM_053202    | 0.0193001   | -1.58953 |
| Ankrd33b      | NM_001164441 | 0.0031589   | -1.59161 |
| C030008P14Rik | ---          | 0.0121062   | -1.59266 |
| Ash2l         | NM_001080793 | 8.66E-06    | -1.59328 |
| Mgl1          | NM_001166249 | 0.0184468   | -1.59534 |
| Ppif          | NM_134084    | 0.00199721  | -1.5959  |
| Prdm16        | NM_001177995 | 0.00172176  | -1.59617 |
| Pdk2          | NM_133667    | 0.00173764  | -1.59649 |
| Thoc3         | NM_028597    | 0.000667828 | -1.59674 |
| Pltp          | NM_011125    | 0.00498905  | -1.59737 |
| Sqle          | NM_009270    | 0.0018813   | -1.59738 |
| Pigg          | NM_001081234 | 0.00453576  | -1.59911 |
| Bckdha        | NM_007533    | 0.011259    | -1.59951 |
| Rdh5          | NM_134006    | 0.00172975  | -1.59978 |
| Sod3          | NM_011435    | 0.00369981  | -1.6001  |
| Trim25        | NM_009546    | 9.60E-06    | -1.60018 |
| Bach2         | NM_001109661 | 0.00327095  | -1.60204 |
| Gm5806        | NM_011561    | 0.0326631   | -1.60322 |

|               |              |             |          |
|---------------|--------------|-------------|----------|
| Rasip1        | NM_028544    | 0.0114027   | -1.60454 |
| Pank3         | NM_145962    | 0.0186852   | -1.60509 |
| Haus2         | NM_025475    | 0.0484309   | -1.60542 |
| Dnaic1        | NM_175138    | 0.0166788   | -1.6065  |
| Stat1         | NM_009283    | 0.00192725  | -1.6072  |
| H2-DMa        | NM_010386    | 0.00616718  | -1.60736 |
| Mpa2l         | NM_194336    | 0.0205046   | -1.60746 |
| ---           | ---          | 0.0244326   | -1.60769 |
| Adam19        | NM_009616    | 0.000118515 | -1.60798 |
| Mbnl3         | NM_134163    | 0.00229751  | -1.61052 |
| ---           | ---          | 0.02071     | -1.61084 |
| Zc3h13        | NM_026083    | 0.0484803   | -1.61116 |
| Efr3b         | NM_001082483 | 0.00245448  | -1.61195 |
| Frmd5         | NM_172673    | 0.00186215  | -1.61233 |
| Ss18          | NM_001161369 | 0.0123001   | -1.61239 |
| Lrtm1         | NM_176920    | 0.0419693   | -1.61283 |
| H2-L          | ---          | 0.00829539  | -1.61413 |
| 2810416G20Rik | XM_001474539 | 0.00227241  | -1.61449 |
| Actr3b        | NM_001004365 | 0.00214654  | -1.61507 |
| Osbp16        | NM_145525    | 0.00388735  | -1.61522 |
| Egfl7         | NM_001164564 | 0.0413194   | -1.61596 |
| Psm13         | NM_011875    | 0.0344571   | -1.61746 |
| Rom1          | NM_009073    | 0.0203194   | -1.61773 |
| Arpc1b        | NM_023142    | 0.00911764  | -1.6188  |
| Egflam        | NM_178748    | 0.0256308   | -1.61931 |
| Zdhhc3        | NM_026917    | 0.0216128   | -1.62102 |
| Slc26a6       | NM_134420    | 0.00369809  | -1.62114 |
| Ogfr          | NM_031373    | 0.00257477  | -1.62352 |
| Parp14        | NM_001039530 | 0.00559239  | -1.62591 |
| Eif4e2        | NM_001039169 | 0.00375606  | -1.62643 |
| Ror1          | NM_013845    | 0.00531192  | -1.62749 |
| Elk3          | NM_013508    | 0.0464969   | -1.62876 |
| Cdc42         | NM_009861    | 0.019901    | -1.63079 |
| Rad52         | NM_001166381 | 0.00132951  | -1.63193 |
| Picalm        | NM_146194    | 0.0169554   | -1.63238 |
| Coro6         | NM_139128    | 0.00852084  | -1.63315 |
| Blmh          | NM_178645    | 0.0252743   | -1.63634 |
| Kenip2        | NM_030716    | 0.000821934 | -1.63721 |
| Eepd1         | NM_026189    | 0.00612887  | -1.63721 |
| Lrrc68        | NM_199149    | 0.0117517   | -1.63743 |
| Klc1          | NM_001025360 | 0.0149528   | -1.63873 |
| H2-D1         | NM_010380    | 0.00513005  | -1.64075 |

|               |              |             |          |
|---------------|--------------|-------------|----------|
| ---           | ---          | 0.0072999   | -1.64285 |
| Lynx1         | NM_011838    | 0.000118533 | -1.64385 |
| Auts2         | NM_177047    | 0.0328919   | -1.64493 |
| Rgs5          | NM_009063    | 0.0459098   | -1.64635 |
| Nav3          | NM_001081035 | 0.000734611 | -1.64681 |
| Med12l        | NM_177855    | 0.00229999  | -1.64844 |
| Spred1        | NM_033524    | 0.00762254  | -1.64849 |
| Ppm1l         | NM_178726    | 0.0193305   | -1.64871 |
| Mgea5         | NM_023799    | 0.00780183  | -1.64904 |
| Entpd4        | NM_026174    | 0.00360461  | -1.65147 |
| Kcnj3         | NM_008426    | 0.00120375  | -1.65183 |
| Parp10        | NM_001163540 | 0.00386599  | -1.65312 |
| 1110003O08Rik | ---          | 0.00529129  | -1.654   |
| H2-Q6         | NM_207648    | 0.0187088   | -1.65622 |
| Stat1         | NM_009283    | 0.000918067 | -1.65701 |
| Foxj2         | NM_021899    | 0.00714745  | -1.65724 |
| Neo1          | NM_001042752 | 0.00115424  | -1.65731 |
| Robld3        | NM_031248    | 0.000850403 | -1.65873 |
| Myom2         | NM_008664    | 0.0104113   | -1.65881 |
| ---           | ---          | 0.0125265   | -1.66056 |
| Itgb6         | NM_001159564 | 0.00479422  | -1.66079 |
| Hdac4         | NM_207225    | 0.00378249  | -1.66328 |
| Cyr61         | NM_010516    | 0.00561384  | -1.6665  |
| Neo1          | NM_001042752 | 0.00678999  | -1.66892 |
| Pi16          | NM_023734    | 0.02818     | -1.6701  |
| Cpm           | NM_027468    | 0.00151142  | -1.67035 |
| Mreg          | NM_001005423 | 0.000706781 | -1.67409 |
| Tkt           | NM_009388    | 0.0101195   | -1.67546 |
| Numa1         | NM_133947    | 0.0406735   | -1.67722 |
| Scara5        | NM_001168318 | 0.0355889   | -1.67773 |
| Nlrc5         | NM_001033207 | 0.0245646   | -1.67974 |
| Vtn           | NM_011707    | 0.0159089   | -1.68095 |
| Higd1c        | NM_001002900 | 0.0065544   | -1.68174 |
| Clip4         | NM_030179    | 0.0052143   | -1.68181 |
| Rprd2         | NM_001081293 | 0.00148236  | -1.68404 |
| H2-D1         | NM_010380    | 0.00632815  | -1.68487 |
| Meis2         | NM_001136072 | 0.00023934  | -1.68549 |
| Col5a3        | NM_016919    | 0.015365    | -1.68559 |
| Auts2         | NM_177047    | 0.00471028  | -1.68713 |
| Tbc1d4        | NM_001081278 | 0.000750675 | -1.68747 |
| Ube2g2        | NM_019803    | 0.02623     | -1.68839 |
| D14Ert436e    | NM_172599    | 0.0181674   | -1.68886 |



|               |              |             |          |
|---------------|--------------|-------------|----------|
| Prmt1         | NM_019830    | 0.00489246  | -1.69032 |
| Eif2b5        | NM_172265    | 0.0228407   | -1.69106 |
| Stat5a        | NM_001164062 | 0.0130321   | -1.69394 |
| LOC100047628  | XM_001476664 | 0.0444453   | -1.69558 |
| Hmox1         | NM_010442    | 0.0017071   | -1.69565 |
| Ergic1        | NM_026170    | 0.0159529   | -1.69591 |
| Tet1          | NM_027384    | 0.000511054 | -1.69728 |
| Pim1          | NM_008842    | 0.0234607   | -1.69768 |
| Fkbp2         | NM_001166368 | 0.0391407   | -1.69824 |
| Rpl3l         | NM_001163945 | 0.00959291  | -1.69971 |
| Rcan2         | NM_030598    | 0.0246597   | -1.70025 |
| Epha4         | NM_007936    | 0.00833211  | -1.70224 |
| Osgin2        | NM_145950    | 0.00150373  | -1.7028  |
| Pik3r3        | NM_181585    | 0.0484465   | -1.70389 |
| Hmcn1         | NM_001024720 | 4.61E-05    | -1.70511 |
| Sf3b1         | NM_031179    | 0.0012884   | -1.70626 |
| Keap1         | NM_001110305 | 0.0459274   | -1.70714 |
| 2310050B05Rik | NR_015477    | 0.0219168   | -1.7101  |
| Egf           | NM_010113    | 0.00447668  | -1.71064 |
| Dhrs4         | NM_001037938 | 0.00297344  | -1.71219 |
| H2-D1         | NM_010380    | 0.0178961   | -1.71302 |
| Fahd1         | NM_023480    | 0.000993605 | -1.71324 |
| Arhgef17      | NM_001081116 | 0.00312866  | -1.71348 |
| Hcls1         | NM_008225    | 0.0127407   | -1.71523 |
| H2-Aa         | NM_010378    | 0.0393835   | -1.71652 |
| Clic1         | NM_033444    | 0.0139475   | -1.71675 |
| Trim63        | NM_001039048 | 0.000153779 | -1.72435 |
| Ephb1         | NM_001168296 | 0.000566139 | -1.72875 |
| Cd93          | NM_010740    | 0.0047061   | -1.73097 |
| Map3k5        | NM_008580    | 3.31E-05    | -1.7323  |
| 2900057H02Rik | NM_144801    | 0.0082588   | -1.73325 |
| Tbx3          | NM_011535    | 0.0337948   | -1.7349  |
| ---           | ---          | 0.00695962  | -1.7415  |
| Abcb1a        | NM_011076    | 0.00382734  | -1.74188 |
| Cdk16         | NM_011049    | 0.00767624  | -1.74326 |
| Ndrp2         | NM_001145959 | 0.00352565  | -1.74562 |
| Irgm2         | NM_019440    | 0.0282024   | -1.74915 |
| Sdf2l1        | NM_022324    | 0.0368639   | -1.74998 |
| Dgat2         | NM_026384    | 0.000287331 | -1.75633 |
| Tkt           | NM_009388    | 0.00544651  | -1.75788 |
| Eml2          | NM_001162996 | 0.00402017  | -1.75842 |
| Fbxo30        | NM_001168297 | 0.00124224  | -1.76051 |

|               |              |             |          |
|---------------|--------------|-------------|----------|
| Acaa1a        | NM_130864    | 0.00495563  | -1.76096 |
| Mtmr4         | NM_133215    | 0.0153591   | -1.76124 |
| Cd93          | NM_010740    | 0.00252662  | -1.76491 |
| Jun           | NM_010591    | 0.0397132   | -1.76544 |
| Asxl1         | NM_001039939 | 0.00044485  | -1.76591 |
| Ptgr2         | NM_029880    | 4.94E-05    | -1.76627 |
| 2310010M20Rik | NM_183283    | 0.00378286  | -1.76686 |
| Adcy6         | NM_007405    | 0.00841609  | -1.7719  |
| Tmem87b       | NM_028248    | 0.0185774   | -1.7749  |
| Fkbp4         | NM_010219    | 0.000340345 | -1.78253 |
| 1500003O03Rik | NM_019769    | 0.0357178   | -1.78849 |
| Asb15         | NM_080847    | 7.93E-05    | -1.78967 |
| Usf1          | NM_009480    | 0.00357687  | -1.79648 |
| Snrnp200      | NM_177214    | 0.000218096 | -1.80045 |
| ---           | ---          | 0.00136766  | -1.80167 |
| ---           | ---          | 0.00206138  | -1.80194 |
| Lrtm1         | NM_176920    | 0.00977367  | -1.80456 |
| A930018M24Rik | XM_907235    | 0.00012225  | -1.80699 |
| Cenpb         | NM_007682    | 0.0184882   | -1.80755 |
| Acads         | NM_007383    | 0.0149046   | -1.80976 |
| Ramp1         | NM_001168392 | 0.035027    | -1.81024 |
| Haus2         | NM_025475    | 0.0227394   | -1.81276 |
| Rorc          | NM_011281    | 0.00048157  | -1.8138  |
| Foxo4         | NM_018789    | 0.000221959 | -1.81654 |
| Tmem101       | NM_029649    | 0.0252676   | -1.81679 |
| Agpat3        | NM_053014    | 9.01E-07    | -1.81834 |
| Ndst1         | NM_008306    | 0.0314837   | -1.82235 |
| D1Bwg0212e    | NM_028043    | 0.00420802  | -1.82506 |
| H2-Q7         | NM_010394    | 0.0188093   | -1.83039 |
| St3gal4       | NM_009178    | 0.00712683  | -1.83481 |
| Rsad2         | NM_021384    | 0.0102274   | -1.83559 |
| Ypel2         | NM_001005341 | 0.000274559 | -1.83622 |
| Npas2         | NM_008719    | 6.63E-06    | -1.8366  |
| Slc2a4        | NM_009204    | 0.0129911   | -1.83693 |
| Aplnr         | NM_011784    | 0.0250297   | -1.8423  |
| Tap2          | NM_011530    | 8.88E-05    | -1.84402 |
| Rc3h2         | NM_001100591 | 0.0166904   | -1.84561 |
| Asb10         | NM_080444    | 0.000819592 | -1.84723 |
| Ung           | NM_001040691 | 0.00304766  | -1.84879 |
| Adam19        | NM_009616    | 7.73E-05    | -1.8493  |
| ---           | ---          | 0.017121    | -1.84998 |
| Prpf19        | NM_134129    | 0.0419174   | -1.85004 |

|           |              |             |          |
|-----------|--------------|-------------|----------|
| Ppil1     | NM_026845    | 0.00101911  | -1.8581  |
| Gmps      | NM_001033300 | 0.000471573 | -1.8592  |
| Kat5      | NM_178637    | 0.0153171   | -1.86103 |
| Prdm16    | NM_001177995 | 0.00425908  | -1.86174 |
| Zc3h7b    | NM_001081016 | 0.000870876 | -1.86195 |
| Ypel2     | NM_001005341 | 0.000146839 | -1.86584 |
| Bcl2l11   | NM_009754    | 0.000150608 | -1.86729 |
| Cyfp2     | NM_133769    | 0.00185616  | -1.86887 |
| Shroom4   | NM_001040459 | 0.0121409   | -1.86928 |
| D7Wsu130e | ---          | 0.0017655   | -1.87532 |
| Nfrkb     | NM_172766    | 9.52E-05    | -1.87934 |
| S1pr3     | NM_010101    | 6.96E-05    | -1.87981 |
| Pfdn2     | NM_011070    | 0.0263454   | -1.88179 |
| Blmh      | NM_178645    | 0.00269972  | -1.88182 |
| Zdhhc21   | NM_026647    | 0.000533152 | -1.88537 |
| Tmx1      | NM_028339    | 0.00481008  | -1.89109 |
| Msh2      | NM_008628    | 5.00E-05    | -1.89204 |
| Samd4     | NM_001037221 | 0.0309984   | -1.89216 |
| Erh       | NM_007951    | 0.0014046   | -1.89339 |
| Klf9      | NM_010638    | 0.000375782 | -1.89508 |
| ---       | ---          | 0.00155281  | -1.89566 |
| ---       | ---          | 0.01571     | -1.8975  |
| Scn4b     | NM_001013390 | 0.00729742  | -1.89965 |
| Plekhf1   | NM_024413    | 0.00196212  | -1.90187 |
| Fnip2     | NM_001162999 | 0.00114962  | -1.90513 |
| ---       | ---          | 0.00962477  | -1.90847 |
| Rnf114    | NM_030743    | 0.00448281  | -1.91496 |
| Slc29a1   | NM_022880    | 1.68E-05    | -1.92057 |
| Gm5806    | NM_011561    | 0.0179194   | -1.92277 |
| Ap2b1     | NM_001035854 | 0.000210223 | -1.92336 |
| Dhrs7c    | NM_001013013 | 0.0019034   | -1.92465 |
| ---       | ---          | 0.0219165   | -1.93001 |
| H2-Aa     | NM_010378    | 0.0148307   | -1.93171 |
| Dynll2    | NM_001168471 | 0.00239072  | -1.93387 |
| Ddit4     | NM_029083    | 0.023037    | -1.93414 |
| Igtp      | NM_018738    | 0.0128853   | -1.94103 |
| Gnb3      | NM_013530    | 0.00220121  | -1.94207 |
| Psap      | NM_001146120 | 0.00249184  | -1.94765 |
| H1f0      | NM_008197    | 0.0027706   | -1.9493  |
| Kcnd2     | NM_019697    | 0.000448674 | -1.95391 |
| H2-Aa     | NM_010378    | 0.0123902   | -1.96053 |
| Mpa2l     | NM_194336    | 0.00409675  | -1.96253 |

|               |              |             |          |
|---------------|--------------|-------------|----------|
| Stt3a         | NM_008408    | 0.00214881  | -1.96358 |
| Rrp1          | NM_010925    | 8.34E-05    | -1.96854 |
| H2-Eb1        | NM_010382    | 0.0154686   | -1.96927 |
| Zfp58         | NM_001007575 | 0.0134145   | -1.97447 |
| Zkscan3       | NM_001145778 | 0.0169677   | -1.97468 |
| Gpt2          | NM_173866    | 0.00245275  | -1.97697 |
| Slc44a2       | NM_152808    | 0.000659571 | -1.97721 |
| Entpd4        | NM_026174    | 0.000209014 | -1.98324 |
| LOC100046232  | NM_017373    | 5.75E-05    | -1.98955 |
| ---           | ---          | 7.95E-05    | -1.98959 |
| Mapk8         | NM_016700    | 4.16E-06    | -1.99131 |
| ---           | ---          | 0.0227128   | -1.99258 |
| Rsrc2         | NM_001005523 | 0.000663754 | -1.99435 |
| Gm5806        | NM_011561    | 0.0054979   | -1.99471 |
| Fus           | NM_139149    | 0.0113199   | -2.01162 |
| Ano10         | NM_133979    | 0.000388875 | -2.01296 |
| Rad23b        | NM_009011    | 0.0217376   | -2.01521 |
| 2900010J23Rik | NM_175190    | 0.00362826  | -2.02099 |
| Sae1          | NM_019748    | 0.0147727   | -2.02689 |
| Dgat2         | NM_026384    | 0.000728399 | -2.03016 |
| Eif3a         | NM_010123    | 0.0138834   | -2.03042 |
| Gm9706        | NM_015783    | 0.00264273  | -2.03506 |
| Slc23a2       | NM_018824    | 0.00345281  | -2.03787 |
| Gm10883       | XM_001476664 | 0.0239873   | -2.0408  |
| Dnaje9        | NM_134081    | 0.00036892  | -2.04409 |
| Kidins220     | NM_001081378 | 0.0130085   | -2.05126 |
| Acacb         | NM_133904    | 0.00771457  | -2.05506 |
| Ddx5          | NM_007840    | 0.000954706 | -2.06289 |
| Kat5          | NM_178637    | 0.0222402   | -2.06512 |
| 5830411K21Rik | ---          | 0.00974817  | -2.0733  |
| ---           | ---          | 0.000771951 | -2.07443 |
| Agpat3        | NM_053014    | 0.000900907 | -2.07534 |
| Tmtc2         | NM_177368    | 0.00054051  | -2.07636 |
| Cflar         | NM_009805    | 0.00353718  | -2.07822 |
| Serinc3       | NM_012032    | 0.00437515  | -2.09055 |
| 2610507B11Rik | NM_001002004 | 0.021738    | -2.0975  |
| Foxn3         | NM_183186    | 0.000120913 | -2.10075 |
| Efcab2        | NM_026626    | 0.0106562   | -2.10314 |
| Tmed9         | NM_026211    | 0.000117269 | -2.11047 |
| Mga           | NM_001164274 | 0.00134759  | -2.11464 |
| Marcks        | NM_008538    | 0.0257702   | -2.11921 |
| Rbak          | NM_001045482 | 1.77E-05    | -2.12099 |

|               |              |             |          |
|---------------|--------------|-------------|----------|
| Psmc13        | NM_011875    | 0.0314329   | -2.12978 |
| Hnrnpul2      | NM_001081196 | 0.0016462   | -2.13282 |
| Epha4         | NM_007936    | 0.000807462 | -2.14475 |
| Aldh2         | NM_009656    | 0.00369367  | -2.14486 |
| Vps13d        | NM_001128198 | 0.00720389  | -2.15995 |
| Cd74          | NM_001042605 | 0.00473024  | -2.16169 |
| Plxnb1        | NM_172775    | 0.000368156 | -2.16897 |
| Igh-2         | ---          | 0.0180221   | -2.18314 |
| Trappc3       | NM_013718    | 8.19E-05    | -2.19004 |
| Metrn         | NM_133719    | 0.00103354  | -2.19322 |
| Ttll1         | NM_178869    | 0.00393064  | -2.19777 |
| ---           | ---          | 0.000256622 | -2.20244 |
| Pdia3         | NM_007952    | 0.0217276   | -2.2069  |
| Psap          | NM_001146120 | 0.00300431  | -2.21016 |
| Igh-2         | ---          | 0.0103566   | -2.25789 |
| Abcb1a        | NM_011076    | 3.05E-05    | -2.26555 |
| Ing3          | NM_023626    | 0.00692437  | -2.2712  |
| Mtmt4         | NM_133215    | 0.0144374   | -2.28767 |
| H2-Ab1        | NM_207105    | 0.00267653  | -2.31345 |
| Numa1         | NM_133947    | 0.0158274   | -2.31444 |
| Arntl         | NM_007489    | 0.000730075 | -2.31756 |
| H2-Aa         | NM_010378    | 0.0134895   | -2.33492 |
| Tbc1d24       | NM_001163847 | 0.000224813 | -2.34297 |
| Oaz2          | NM_010952    | 0.0100785   | -2.34331 |
| Aen           | NM_001162939 | 0.00184821  | -2.36658 |
| Eif2c4        | NM_153177    | 0.00246199  | -2.37359 |
| 2310042D19Rik | NM_172417    | 0.015031    | -2.38637 |
| Tnpo3         | NM_177296    | 0.000786304 | -2.42082 |
| ---           | ---          | 0.00198954  | -2.43346 |
| Bax           | NM_007527    | 0.000356533 | -2.44666 |
| C1qtnf9       | NM_183175    | 0.0159956   | -2.4592  |
| Sh3bp5        | NM_011894    | 0.00739239  | -2.46957 |
| Slc35e3       | NM_029875    | 0.0033182   | -2.4811  |
| Sema4c        | NM_001126047 | 0.000212782 | -2.5418  |
| H2-Ab1        | NM_207105    | 0.00133003  | -2.54382 |
| Tnpo3         | NM_177296    | 0.000160943 | -2.56794 |
| Prnd          | NM_001126338 | 0.00489888  | -2.59052 |
| Dnajc7        | NM_019795    | 2.01E-05    | -2.59939 |
| Utp6          | NM_144826    | 0.00718457  | -2.7639  |
| Entpd4        | NM_026174    | 3.18E-05    | -2.76517 |
| Vapb          | NM_019806    | 0.00465291  | -2.78192 |
| Bst2          | NM_198095    | 0.00111361  | -2.89103 |

|         |              |             |          |
|---------|--------------|-------------|----------|
| H2-Ab1  | NM_207105    | 0.00100727  | -2.8924  |
| Atp1a2  | NM_178405    | 0.00856213  | -2.95698 |
| Eif4e2  | NM_001039169 | 0.00613319  | -2.98729 |
| Plekhg1 | NM_001033253 | 0.00280654  | -3.01088 |
| Cyp39a1 | NM_018887    | 0.00602601  | -3.07282 |
| Vti1b   | NM_016800    | 1.41E-06    | -3.11634 |
| Gm10336 | ---          | 0.00118854  | -3.81666 |
| Pigk    | NM_025662    | 0.00100476  | -4.61898 |
| Ces3    | NM_053200    | 2.21295E-05 | -6.84752 |

## Signal Regulatory Protein- $\alpha$ Protects Against Cardiac Hypertrophy Via the Disruption of Toll-Like Receptor 4 Signaling

Ding-Sheng Jiang, Xiao-Fei Zhang, Lu Gao, Jing Zong, Heng Zhou, Yu Liu, Yan Zhang, Zhou-Yan Bian, Li-Hua Zhu, Guo-Chang Fan, Xiao-Dong Zhang and Hongliang Li

*Hypertension*. 2014;63:96-104; originally published online October 7, 2013;

doi: 10.1161/HYPERTENSIONAHA.113.01506

*Hypertension* is published by the American Heart Association, 7272 Greenville Avenue, Dallas, TX 75231  
Copyright © 2013 American Heart Association, Inc. All rights reserved.

Print ISSN: 0194-911X. Online ISSN: 1524-4563

The online version of this article, along with updated information and services, is located on the World Wide Web at:

<http://hyper.ahajournals.org/content/63/1/96>

Data Supplement (unedited) at:

<http://hyper.ahajournals.org/content/suppl/2013/10/07/HYPERTENSIONAHA.113.01506.DC1.html>

**Permissions:** Requests for permissions to reproduce figures, tables, or portions of articles originally published in *Hypertension* can be obtained via RightsLink, a service of the Copyright Clearance Center, not the Editorial Office. Once the online version of the published article for which permission is being requested is located, click Request Permissions in the middle column of the Web page under Services. Further information about this process is available in the [Permissions and Rights Question and Answer](#) document.

**Reprints:** Information about reprints can be found online at:  
<http://www.lww.com/reprints>

**Subscriptions:** Information about subscribing to *Hypertension* is online at:  
<http://hyper.ahajournals.org/subscriptions/>
